# Supplementary material for: 2-Aryl-1,3,4-trifluoro-6,7,10,11-tetrakis(alkoxy)triphenylene: a remarkable and highly inclusive mesomorphic platform
Source: Royal Society of Chemistry journal article supplement (doi:10.1039/d3tc02569a), 2023-01-01
Supplement: d3tc02569a1.pdf [file d3tc02569a1.pdf]

Supporting Information

**2-Aryl-1,3,4-trifluoro-6,7,10,11-tetrakis(alkoxy)triphenylene: a  
remarkable and highly inclusive mesomorphic platform**

Hui-Min Pan,<sup>a</sup> Jiao He,<sup>a</sup> Wen-Hao Yu,<sup>a</sup> Ping Hu,<sup>a</sup> Bi-Qin Wang,<sup>a</sup> Ke-Qing Zhao,<sup>\*a</sup> and Bertrand Donnio<sup>\*c</sup>

**Contents**

1. Materials and Methods
2. Synthesis and Characterization
3. NMR
4. HRMS
5. X-ray Crystallography
6. TGA
7. POM
8. DSC
9. S/WAXS
10. DFT
11. TOF

## 1. Materials and Methods

**Chemicals.** All commercially available starting materials were used directly without further purification. The solvents of air- and moisture-sensitive reactions were carefully distilled from appropriate drying agents before use.

**Experimental.** Air- and moisture-sensitive reactions were assembled on a Schlenk vacuum line using oven-dried glassware with a Teflon screw cap under Ar atmosphere. Air- and moisture-sensitive liquids and solutions were transferred by syringe. Reactions were stirred using Teflon-coated magnetic stir bars. Elevated temperatures were maintained using Thermostat-controlled air baths. Organic solutions were concentrated using a rotary evaporator with a diaphragm vacuum pump.

**Analytical.**  $^{19}\text{F}$ -NMR/ $^1\text{H}$ -NMR/ $^{13}\text{C}$ -NMR spectra were recorded using a Varian UNITY INOVA 400/100 MHz spectrometer in  $\text{CDCl}_3$ , and TMS as the internal standard. High-resolution mass spectra (HRMS) spectra were recorded at the Fourier Transform ion cyclotron resonance mass spectrometer (7.0T FTICR-MS) made by IonSpec (Varian now) with MALDI as the ion source. Elemental analyses (EA) were performed on a Vario MicroSelect (Elementar Company, German). The thermal gravimetric analysis (TGA) was measured on a TA-TGA Q500 instrument with heating rate of 10 or 20  $^\circ\text{C}/\text{min}$  in  $\text{N}_2$  atmosphere. The phase transition temperatures and enthalpy changes were investigated using a TA-DSC Q100 differential scanning calorimeter (DSC) under  $\text{N}_2$  atmosphere with heating or cooling rate of 10  $^\circ\text{C}/\text{min}$ . Liquid crystalline optical textures were observed on a Polarized Optical Microscope (POM) on an Olympus BH2 Polarized Optical Microscope equipped with a Mettler FP82HT hot-stages of which temperatures were controlled by XPR-201 and Mettler FP90. Temperature-variation SAXS (small-angle X-ray scattering) and WAXS (wide-angle X-ray scattering) experiments on Rigaku Smart lab. UV/Vis. absorption spectra were recorded on a Perkin Elmer Lambda 950 spectrophotometer at room temperature. Fluorescence was measured on a HORIBA Fluoromax-4p, and the quantum yields were measured by a HORIB-F-3029 Integrating Sphere, HORIBA, Kyoto, Japan. Crystal structure was measured on a Rigaku XtalAB Synergy R, DW system.

Photocurrent time-of-flight (TOF) technique uses  $\text{N}_2$  gas laser (KEN-1520, Usho, 600 ps pulse width,  $\lambda = 337 \text{ nm}$ ) and hot stage to measure compound electron and hole mobilities. The liquid crystalline sample cell with indium-tin-oxide (ITO) electrodes was mounted on a handmade hot stage, and electric bias was applied by dry cell batteries. The polarity (20 to 50 kV/cm) electric field is applied, a positive or negative charge carriers hopping through the self-organized aligned sample, causing displacement photocurrent, which was detected on a digital oscilloscope (DSO5052A, Agilent Technology) with a commercially available current amplifier (DHPCA-100, FEMTO). Thickness of the cell used for measurements was in range of 15~20  $\mu\text{m}$ .

The cells were filled with the sample in its isotropic liquid state by capillary forces, and then cooled down to the columnar mesophase. POM images showed low-birefringent textures with homeotropic domains, and the laser focused on a spot with homeotropic aligned sample area.

## 2. Synthesis and Characterization

### 2.1 Synthesis of the pentafluorobiphenyl

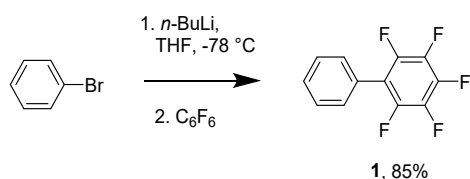

**Scheme S1.** Preparation of the pentafluorobiphenyl.

Bromobenzene (5.00 g, 31.80 mmol) was added in 200 mL reaction tube and THF (30 mL) was added under protection of argon. *n*-Butyllithium (2.5 M in hexane, 63.68 mmol) was slowly injected into the reaction tube with a syringe at -78 °C and the mixture was stirred for 1 h in argon, to prepare the aryl lithium reagent. Under Ar atmosphere perfluorobenzene (11.58 g, 63.74 mmol) was dissolved in THF (20 mL), then aryl lithium reagent was slowly added into the reaction system at 0 °C and stirred at room temperature for 2 h. The reaction mixture was extracted with ether. The combined organic layers were dried over anhydrous MgSO<sub>4</sub> and concentrated in vacuo. Recrystallization with petroleum-ether, white solid **1** was obtained by sublimation and purification at 90-100 °C (6.58 g, yield 85%). <sup>1</sup>H NMR (600 MHz, TMS, CDCl<sub>3</sub>), δ (ppm) 7.52 – 7.45 (m, 3H, ArH), 7.42 (d, *J* = 7.8 Hz, 2H, ArH). <sup>19</sup>F NMR (565 MHz, TMS, CDCl<sub>3</sub>), δ (ppm) -143.22 – -143.30 (m, 2F, ArF), -155.57 – -155.64 (m, 1F, ArF) -162.19 – -162.29 (m, 2F, ArF).

### 2.2 Synthesis of 2,2'-dibromo-4,4',5,5'-tetrakis(alkoxy)-1,1'-biphenyl derivatives, 2Br-BP<sub>*n*</sub>

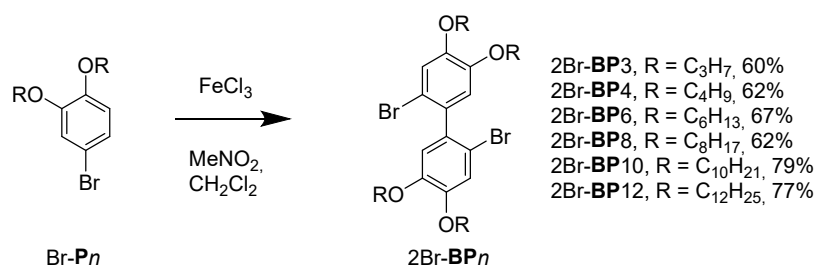

**Scheme S2.** Preparation of the dibromobiphenyls, 2Br-BP<sub>*n*</sub>.

General procedure: To a stirred solution of 1-bromo-3,4-bis(alkoxy)benzene (Br-P<sub>*n*</sub>, 1.0 equiv) in CH<sub>2</sub>Cl<sub>2</sub> (60 mL), a solution of FeCl<sub>3</sub> (2.0 equiv) in CH<sub>3</sub>NO<sub>2</sub> (10 mL) was added. The resulting solution was stirred at room temperature until completion of the reaction. The reaction mixture was quenched with methanol and extracted with dichloromethane. The combined organic layers were dried over anhydrous MgSO<sub>4</sub> and concentrated in vacuo. The residue was purified by column chromatography on silica gel with dichloromethane:petroleum ether (1:4.5) mixture as eluent. Recrystallization with ethanol and methanol gave white solid 2,2'-dibromo-4,4',5,5'-tetrakis(alkoxy)-1,1'-biphenyl 2Br-BP<sub>*n*</sub> (yields 60-80%).

2,2'-Dibromo-4,4',5,5'-tetrakis(propoxy)-1,1'-biphenyl(2Br-BP<sub>3</sub>): Br-P<sub>3</sub> (3.35 mg,

6.15 mmol) was converted to the white solid 2Br-**BP3** (2.01 g, yield 60%). <sup>1</sup>H NMR (400 MHz, TMS, CDCl<sub>3</sub>) δ (ppm) 7.10 (s, 2H, ArH), 6.76 (s, 2H, ArH), 4.02 – 3.94 (m, 8H, OCH<sub>2</sub>), 1.93 – 1.77 (m, 8H, CH<sub>2</sub>), 1.48 – 1.27 (m, 8H, CH<sub>2</sub>), 0.91 – 0.86 (m, 12H, CH<sub>3</sub>).

2,2'-Dibromo-4,4',5,5'-tetrakis(butyloxy)-1,1'-biphenyl (2Br-**BP4**): Br-**P4** (4.68 mg, 7.79 mmol) was converted to the white solid 2Br-**BP4** (2.90 g, yield 62%). <sup>1</sup>H NMR (400 MHz, TMS, CDCl<sub>3</sub>) δ (ppm) 7.10 (s, 2H, ArH), 6.76 (s, 2H, ArH), 4.00 - 3.92 (m, 8H, OCH<sub>2</sub>), 1.93 – 1.77 (m, 8H, CH<sub>2</sub>), 1.08 – 1.00 (m, 12H, CH<sub>3</sub>).

2,2'-Dibromo-4,4',5,5'-tetrakis(hexyloxy)-1,1'-biphenyl (2Br-**BP6**): Br-**P6** (6.64 g, 9.32 mmol) was converted to the white solid 2Br-**BP6** (4.45 g, yield 67%). <sup>1</sup>H NMR (400 MHz, TMS, CDCl<sub>3</sub>) δ (ppm) 7.10 (s, 2H, ArH), 6.76 (s, 2H, ArH), 4.03 – 3.95 (m, 8H, OCH<sub>2</sub>), 1.87 – 1.74 (m, 8H, CH<sub>2</sub>), 1.57 – 1.46 (m, 24H, CH<sub>2</sub>), 1.01 – 0.94 (m, 12H, CH<sub>3</sub>).

2,2'-Dibromo-4,4',5,5'-tetrakis(octyloxy)-1,1'-biphenyl (2Br-**BP8**): Br-**P8** (6.87 g, 8.12 mmol) was converted to the white solid 2Br-**BP8** (4.22 g, yield 62%). <sup>1</sup>H NMR (400 MHz, TMS, CDCl<sub>3</sub>) δ (ppm) 7.10 (s, 2H, ArH), 6.76 (s, 2H, ArH), 4.02 – 3.94 (m, 8H, OCH<sub>2</sub>), 1.93 – 1.77 (m, 8H, CH<sub>2</sub>), 1.50 – 1.31 (m, 40H, CH<sub>2</sub>), 0.93 – 0.87 (m, 12H, CH<sub>3</sub>).

2,2'-Dibromo-4,4',5,5'-tetrakis(decyloxy)-1,1'-biphenyl (2Br-**BP10**): Br-**P10** (7.85 mg, 8.38 mmol) was converted to the white solid 2Br-**BP10** (6.20 g, yield 79%). <sup>1</sup>H NMR (400 MHz, TMS, CDCl<sub>3</sub>) δ (ppm) 7.08 (s, 2H, ArH), 6.75 (s, 2H, ArH), 4.02 – 3.93 (m, 8H, OCH<sub>2</sub>), 1.86 – 1.76 (m, 8H, CH<sub>2</sub>), 1.48 – 1.21 (m, 56H, CH<sub>2</sub>), 0.91 – 0.83 (m, 12H, CH<sub>3</sub>).

2,2'-Dibromo-4,4',5,5'-tetrakis(dodecyloxy)-1,1'-biphenyl (2Br-**BP12**): Br-**P12** (7.01 mg, 6.68 mmol) was converted to the white solid 2Br-**BP12** (5.40 g, yield 77%). <sup>1</sup>H NMR (400 MHz, TMS, CDCl<sub>3</sub>) δ (ppm) 7.08 (s, 2H, ArH), 6.75 (s, 2H, ArH), 4.02 – 3.93 (m, 8H, OCH<sub>2</sub>), 1.86 – 1.76 (m, 8H, CH<sub>2</sub>), 1.48 – 1.21 (m, 72H, CH<sub>2</sub>), 0.91 – 0.83 (m, 12H, CH<sub>3</sub>).

### 2.3 Synthesis of the 2-phenyl-1,3,4-trifluorotriphenylene, **PHO**

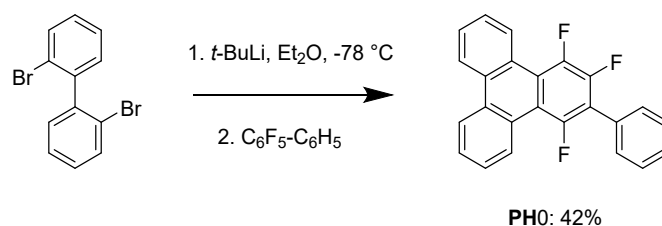

**Scheme S3.** Synthesis of **PHO**.

Under protection of argon, 2,2-dibromobiphenyl (0.30 g, 0.96 mmol) was charged in 50 mL reaction tube and Et<sub>2</sub>O (10 mL) was added. *t*-Butyllithium (1.3 M in Hexane, 3.84 mmol) was slowly injected into the reaction tubes with a syringe at -78 °C and the reaction mixture was stirred at -78 °C for 2 h. Ph-C<sub>6</sub>F<sub>5</sub> (0.54 g, 1.44 mmol) was added and the reaction solution continuing stirred at -78 °C for 0.5 h, then at room temperature for 10 h. The reaction mixture was extracted with dichloromethane. The combined organic layers were dried over anhydrous MgSO<sub>4</sub> and concentrated in vacuo. The crude product was separated and purified by silica gel column chromatography with (dichloromethane:petroleum ether = 1:3) as eluent, recrystallization with ethyl acetate and ethanol gave white solid (0.15 g, yield 42%).



**<sup>1</sup>H NMR** (400 MHz, CDCl<sub>3</sub>) δ (ppm) 9.06 – 9.01 (m, 1H, ArH), 9.00 – 8.95 (m, 1H, ArH), 8.66 – 8.65 (m, 1H, ArH), 8.64 – 8.63 (m, 1H, ArH), 7.76 – 7.47 (m, 9H, ArH). **<sup>19</sup>F NMR** (565 MHz, CDCl<sub>3</sub>) δ (ppm) -113.98 (d, *J* = 14.4 Hz, 1F, ArF), -139.27 (d, *J* = 19.5 Hz, 1F, ArF), -140.51 (t, *J* = 17.3 Hz, 1F, ArF). **<sup>13</sup>C NMR** (151 MHz, CDCl<sub>3</sub>) δ (ppm) 154.10, 152.39, 147.42, 146.78, 145.89, 145.15, 130.80, 130.57, 130.38, 128.74, 128.56, 128.48, 128.48, 128.21, 128.12, 128.01, 127.91, 127.74, 126.59 (d, *J* = 18.6 Hz), 123.20, 120.59 (t, *J* = 5.0 Hz), 126.66 – 126.53 (m), 116.39 (d, *J* = 13.4 Hz). **HRMS (MALDI)** Calcd for C<sub>24</sub>H<sub>13</sub>F<sub>3</sub> [M]<sup>+</sup> *m/z*: 358.0969 (100%), 359.1003 (26.0%), 360.1036 (3.2%); found 358.0964 (100%), 359.0998 (25%), 360.1033 (3.3%).

#### 2.4 Synthesis of the 2-phenyl-1,3,4-trifluoro-6,7,10,11-tetra (alkoxy) triphenylene derivatives, **PH<sub>*n*</sub>**

General procedure: Under protection of argon, 2Br-**BP<sub>*n*</sub>** (1.0 equiv) was added in 50 mL reaction tube and then THF (10 mL) was added. *n*-Butyllithium (2.5 M in Hexane, 4.0 equiv) was slowly injected into the reaction tubes with a syringe at -78 °C and the reaction mixture was stirred at -78 °C for 2 h. C<sub>6</sub>F<sub>5</sub>-C<sub>6</sub>H<sub>5</sub> (4.0 equiv) was added and the reaction solution continuing stirred at -78 °C for 0.5 h, then at room temperature for 10 h. The reaction mixture was extracted with dichloromethane. The combined organic layers were dried over anhydrous MgSO<sub>4</sub> and concentrated in vacuo. The crude product was separated and purified by silica gel column chromatography with (dichloromethane:petroleum ether = 1:3) as eluent, recrystallization with ethyl acetate and ethanol gave white solid **PH<sub>*n*</sub>** (yields 60-90%).

2-Phenyl-1,3,4-trifluoro-6,7,10,11-tetra (propyloxy) triphenylene (**PH3**). 2Br-**BP3** (0.30 g, 0.55 mmol) was converted to the white solid **PH3** (0.23 g, yield 70%). **<sup>1</sup>H NMR** (400 MHz, TMS, CDCl<sub>3</sub>) δ (ppm) 8.50 (d, *J* = 5.6 Hz, 1H, ArH), 8.45 (d, *J* = 6.0 Hz, 1H, ArH), 7.82 (s, 2H, ArH), 7.62 (d, *J* = 7.4 Hz, 2H, ArH), 7.56 (t, *J* = 7.4 Hz, 2H, ArH), 7.51 (t, *J* = 8.0 Hz, 1H, ArH), 4.24 – 4.10 (m, 8H, OCH<sub>2</sub>), 2.03 – 1.91 (m, 8H, CH<sub>2</sub>), 1.18 – 1.07 (m, 12H, CH<sub>3</sub>). **<sup>19</sup>F NMR** (376 MHz, TMS, CDCl<sub>3</sub>) δ (ppm) -115.44 – -116.13 (m, 1F, ArF), -141.73 (d, *J* = 18.6 Hz, 1F, ArF), -142.37 (s, 1F, ArF). **<sup>13</sup>C NMR** (151 MHz, CDCl<sub>3</sub>) δ (ppm) 153.50, 151.83, 149.78, 149.22, 148.60, 148.44, 146.38 – 146.07 (m), 144.80 – 144.45(m), 130.70, 129.16, 128.52, 128.39, 125.46, 124.96, 120.72 – 119.71 (m), 119.71 – 119.29 (m), 116.85 – 110.98 (m), 106.43, 106.10. **HRMS (MALDI)** calcd for C<sub>36</sub>H<sub>37</sub>F<sub>3</sub>O<sub>4</sub> [M]<sup>+</sup> *m/z*: 590.2644 (100%), 591.2677 (38.9%), 592.2711 (7.4%); found 590.2640 (100%), 591.2673 (39%), 592.2707 (7.3%). **Elemental Analysis** (C<sub>36</sub>H<sub>37</sub>F<sub>3</sub>O<sub>4</sub>, MW 590.68): calcd C 73.20%, H 6.31%; found C 73.15%, H 5.85%.

2-Phenyl-1,3,4-trifluoro-6,7,10,11-tetra(butyloxy)triphenylene (**PH4**). 2Br-**BP4** (0.40 g, 0.67 mmol) was converted to the white solid **PH4** (0.38 g, yield 87%). **<sup>1</sup>H NMR** (400 MHz, TMS, CDCl<sub>3</sub>) δ (ppm) 8.50 (d, *J* = 5.7 Hz, 1H, ArH), 8.45 (d, *J* = 6.1 Hz, 1H, ArH), 7.82 (s, 2H, ArH), 7.61 (d, *J* = 7.6 Hz, 2H, ArH), 7.56 (t, *J* = 7.5 Hz, 2H, ArH), 7.49 (t, *J* = 7.2 Hz, 1H, ArH), 4.29 – 4.14 (m, 8H, OCH<sub>2</sub>), 2.00 – 1.83 (m, 8H, CH<sub>2</sub>), 1.65 – 1.51 (m, 8H, CH<sub>2</sub>), 1.10 – 0.94 (m, 12H, CH<sub>3</sub>). **<sup>19</sup>F NMR** (376 MHz, TMS, CDCl<sub>3</sub>) δ (ppm) -115.70 (s, 1F, ArF), -141.74 (d, *J* = 18.9 Hz, 1F, ArF), -142.37 (s, 1F, ArF). **<sup>13</sup>C NMR** (151 MHz, CDCl<sub>3</sub>) δ (ppm) 153.47, 151.84, 149.76, 149.21, 148.59, 148.43, 146.39 – 146.01 (m), 144.72 – 144.43 (m), 130.72, 129.17, 128.50, 128.38, 125.41, 124.93, 120.28 – 119.72

(m), 117.04 – 116.81 (m), 115.59, 111.40 – 110.68 (m), 106.29, 105.96. **HRMS (MALDI)** calcd for  $C_{40}H_{45}F_3O_4$   $[M]^+$  m/z: 646.3270 (100%), 647.3303 (43.3%), 648.3337 (9.1%), 649.3371 (1.3%); found 646.3261 (100%), 647.3294 (53%), 648.3328 (14%), 649.3362 (1%). **Elemental Analysis** ( $C_{40}H_{45}F_3O_4$ , MW 646.33): calcd C 74.28%, H 7.01%; found C 74.10%, H 6.53%.

2-Phenyl-1,3,4-trifluoro-6,7,10,11-tetra(hexyloxy)triphenylene (**PH6**). 2Br-BP6 (0.40 g, 0.56 mmol) was converted to the white solid **PH6** (0.27 g, yield 64%).  **$^1H$  NMR** (400 MHz, TMS,  $CDCl_3$ )  $\delta$  (ppm) 8.49 (d,  $J$  = 5.8 Hz, 1H, ArH), 8.44 (d,  $J$  = 6.1 Hz, 1H, ArH), 7.81 (s, 2H, ArH), 7.61 (d,  $J$  = 7.4 Hz, 2H, ArH), 7.56 (t,  $J$  = 7.5 Hz, 2H, ArH), 7.50 (t, 1H, ArH), 4.29 – 4.17 (m, 6H,  $OCH_2$ ), 4.13 (t,  $J$  = 6.4 Hz, 2H,  $OCH_2$ ), 2.00 – 1.85 (m, 8H,  $CH_2$ ), 1.65 – 1.47 (m, 8H,  $CH_2$ ), 1.42 – 1.34 (m, 16H,  $CH_2$ ), 0.99 – 0.86 (m, 12H,  $CH_3$ ).  **$^{19}F$  NMR** (376 MHz, TMS,  $CDCl_3$ )  $\delta$  (ppm) -115.67 (s, 1F, ArF), -141.76 (d,  $J$  = 19.3, 1F, ArF), -142.35 (s, 1F, ArF).  **$^{13}C$  NMR** (151 MHz,  $CDCl_3$ )  $\delta$  (ppm) 153.51, 151.86, 149.84, 149.27, 148.66, 148.51, 146.46 – 145.59 (m), 144.92 – 144.49 (m), 130.69, 129.16, 128.53, 128.41, 125.50, 124.98, 120.34 – 119.80 (m), 117.16 – 116.88 (m), 115.60, 111.44 – 110.98 (m), 106.46, 106.14. **HRMS (MALDI)** calcd for  $C_{48}H_{61}F_3O_4$   $[M]^+$  m/z: 758.4522 (100%), 759.4555 (51.9%), 760.4589 (13.2%), 761.4623 (2.2%); found 758.4533 (100%), 759.4566 (54%), 760.4600 (15%), 761.4634 (1.5%). **Elemental Analysis** ( $C_{48}H_{61}F_3O_4$ , MW 759.01): calcd C 75.96%, H 8.10%; found C 75.79%, H 7.59%.

2-Phenyl-1,3,4-trifluoro-6,7,10,11-tetra(octyloxy)triphenylene (**PH8**). 2Br-BP8 (0.40 g, 0.48 mmol) was converted to the white solid **PH8** (0.34 g, yield 80%).  **$^1H$  NMR** (400 MHz, TMS,  $CDCl_3$ )  $\delta$  (ppm) 8.49 (m, 1H, ArH), 8.43 (d,  $J$  = 6.3 Hz, 1H, ArH), 7.85 – 7.77 (m, 2H, ArH), 7.62 (d,  $J$  = 7.5 Hz, 2H, ArH), 7.56 (t,  $J$  = 7.4 Hz, 2H, ArH), 7.49 (t,  $J$  = 7.2 Hz, 1H, ArH), 4.29 – 4.17 (m, 6H,  $OCH_2$ ), 4.13 (t,  $J$  = 6.3 Hz, 2H,  $OCH_2$ ), 2.00 – 1.85 (m, 8H,  $CH_2$ ), 1.65 – 1.49 (m, 8H,  $CH_2$ ), 1.46 – 1.22 (m, 32H,  $CH_2$ ), 0.98 – 0.82 (m, 12H,  $CH_3$ ).  **$^{19}F$  NMR** (376 MHz, TMS,  $CDCl_3$ )  $\delta$  (ppm) -115.50 – -116.06 (m, 1F, ArF), -141.77 (d,  $J$  = 12 Hz, 1F, ArF), -142.34 (t,  $J$  = 14.5 Hz, 1F, ArF).  **$^{13}C$  NMR** (151 MHz,  $CDCl_3$ )  $\delta$  (ppm) 153.50, 151.87, 149.83, 149.26, 148.65, 148.50, 146.47 – 146.01 (m), 144.85 – 144.56 (m), 130.70, 129.17, 128.52, 128.40, 125.48, 124.98, 120.35 – 119.79 (m), 117.14 – 116.87(m), 115.58, 111.46 – 110.98 (m), 106.46, 106.13. **HRMS (MALDI)** calcd for  $C_{56}H_{77}F_3O_4$   $[M]^+$  m/z: 870.5774 (100%), 871.5808 (60.6%), 872.5841 (18.0%), 873.5875 (3.5%); found 870.5782 (100%), 871.5829 (65%), 872.5860 (19%), 873.5887 (3.3%). **Elemental Analysis** ( $C_{56}H_{77}F_3O_4$ , MW 871.22): calcd C 77.20%, H 8.91%; found C 77.00%, H 8.42%.

2-Phenyl-1,3,4-trifluoro-6,7,10,11-tetra(decyloxy)triphenylene (**PH10**). 2Br-BP10 (0.40 g, 0.43 mmol) was converted to the white solid **PH10** (0.33 g, yield 79%).  **$^1H$  NMR** (400 MHz, TMS,  $CDCl_3$ )  $\delta$  (ppm) 8.49 (d,  $J$  = 5.9 Hz, 1H, ArH), 8.44 (d,  $J$  = 6.2 Hz, 1H, ArH), 7.82 (d,  $J$  = 1.3 Hz, 2H, ArH), 7.61 (d,  $J$  = 7.5 Hz, 2H, ArH), 7.56 (t,  $J$  = 7.4 Hz, 2H, ArH), 7.50 (t,  $J$  = 8.0 Hz, 1H, ArH), 4.29 – 4.17 (m, 6H,  $OCH_2$ ), 4.13 (t,  $J$  = 6.5 Hz, 2H,  $OCH_2$ ), 2.00 – 1.86 (m, 8H,  $CH_2$ ), 1.60 – 1.48 (m, 8H,  $CH_2$ ), 1.44 – 1.23 (m, 48H,  $CH_2$ ), 0.94 – 0.82 (m, 12H,  $CH_3$ ).  **$^{19}F$  NMR** (376 MHz, TMS,  $CDCl_3$ )  $\delta$  (ppm) -115.68 (t,  $J$  = 12 Hz, 1F, ArF), -141.71 – -141.77 (m, 1F, ArF), -142.19 – -142.47 (m, 1F, ArF).  **$^{13}C$  NMR** (151 MHz,  $CDCl_3$ )  $\delta$  (ppm) 153.51, 151.87, 149.77, 149.22, 148.61, 148.45, 146.35 –

146.03 (m), 144.85 – 144.36 (m), 130.72, 129.18, 128.50, 128.38, 125.42, 124.95, 120.30 – 119.77 (m), 115.62, 111.40 – 111.84 (m), 106.36, 106.02. **HRMS (MALDI)** calcd for  $C_{64}H_{93}F_3O_4$   $[M]^+$   $m/z$ : 982.7026 (100%), 983.7060 (69.2%), 984.7093 (23.6%); found 982.7033 (100%), 983.7067 (81%), 984.7100 (30%). **Elemental Analysis** ( $C_{64}H_{93}F_3O_4$ , MW 983.44): calcd C 78.16%, H 9.53%; found C 78.17%, H 9.43%.

2-Phenyl-1,3,4-trifluoro-6,7,10,11-tetra(dodecyloxy)triphenylene (**PH12**). 2Br-BP12 (0.30 g, 0.29 mmol) was converted to the white solid **PH12** (0.19 g, yield 61%).  **$^1H$  NMR** (400 MHz, TMS,  $CDCl_3$ )  $\delta$  (ppm) 8.47 (d,  $J$  = 5.7 Hz, 1H, ArH), 8.43 (d,  $J$  = 6.2 Hz, 1H, ArH), 7.80 (s, 2H, ArH), 7.62 (d,  $J$  = 7.4 Hz, 2H, ArH), 7.56 (t,  $J$  = 7.4 Hz, 2H, ArH), 7.49 (t,  $J$  = 7.2 Hz, 1H, ArH), 4.27 – 4.17 (m, 6H,  $OCH_2$ ), 4.13 (t,  $J$  = 6.5 Hz, 2H,  $OCH_2$ ), 1.92 (m, 8H,  $CH_2$ ), 1.63 – 1.47 (m, 10H,  $CH_2$ ), 1.43 – 1.24 (m, 62H,  $CH_2$ ), 0.88 (t,  $J$  = 6.6 Hz, 12H,  $CH_3$ ).  **$^{19}F$  NMR** (376 MHz, TMS,  $CDCl_3$ )  $\delta$  (ppm) -115.68 (d,  $J$  = 12 Hz, 1F, ArF), -141.73 (d,  $J$  = 19.7, 1F, ArF), -142.17 – -142.50 (m, 1F, ArF).  **$^{13}C$  NMR** (151 MHz,  $CDCl_3$ )  $\delta$  (ppm) 153.54, 151.89, 149.85, 149.29, 148.68, 148.51, 146.14, 144.49, 130.69, 129.17, 128.54, 128.41, 125.52, 125.00, 120.38 – 119.83(m), 116.96, 115.67, 111.48, 111.26, 106.49, 106.16. **HRMS (MALDI)** calcd for  $C_{72}H_{109}F_3O_4$   $[M]^+$   $m/z$ : 1094.8278 (100%), 1095.8312 (77.9%), 1096.8345 (29.9%), 1097.8379 (7.5%), 1098.8412 (1.4%); found 1094.8256 (100%), 1095.8290 (87%), 1096.8323 (36%), 1097.8357 (9.5%), 1098.8390 (1.6%). **Elemental Analysis** ( $C_{72}H_{109}F_3O_4$ , MW 1095.66): calcd C 78.93%, H 10.03%; found C 79.02%, H 9.91%.

#### 2.5 Synthesis of 2,3,6,7-tetrakis(hexyloxy)-10-phenyltriphenylene, **BP6**

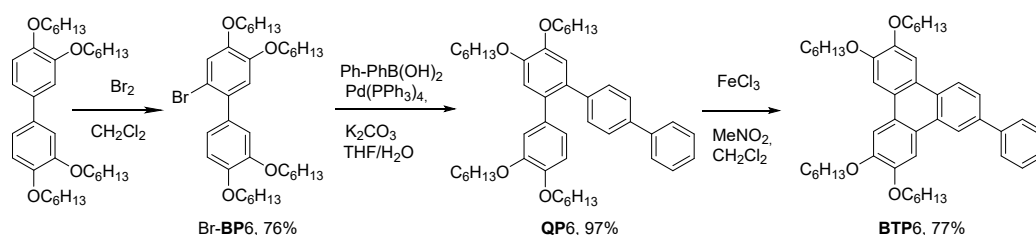

**Scheme S4.** Preparation of **BTP6**.

Synthesis of 2-bromo-3',4,4',5-tetrahexyloxy-1,1'-biphenyl (**Br-BP6**): 3,3',4,4'-tetra(hexyloxy)-1,1'-biphenyl (2.50 g, 4.6 mmol) was dissolved in dry  $CH_2Cl_2$  (100 mL), and bromine (0.77 g, 4.8 mmol) diluted with  $CH_2Cl_2$  was added slowly (1 drop for 2 seconds). The resulting solution was stirred at room temperature until completion of the reaction. The reaction mixture was quenched with aqueous sodium hydrogen sulfite and extracted with dichloromethane. The combined organic layers were dried over anhydrous  $MgSO_4$  and concentrated in vacuum. The crude product was purified by column chromatography on silica gel with (dichloromethane:petroleum ether = 1:2) mixture as eluent. Recrystallized from ethanol and methanol gave white solid (2.20 g, yield 76%).  **$^1H$  NMR** (400 MHz, TMS,  $CDCl_3$ )  $\delta$  (ppm) 7.11 (s, 1H, ArH), 6.95 (s, 1H, ArH), 6.92 – 6.87 (m, 2H, ArH), 6.84 (s, 1H, ArH), 4.05 – 3.94 (m, 8H,  $OCH_2$ ), 1.87 – 1.76 (m, 8H,  $CH_2$ ), 1.49 – 1.44 (m, 8H,  $CH_2$ ), 1.39 – 1.28 (m, 16H,  $CH_2$ ), 0.96 – 0.85 (m, 12H,  $CH_3$ ).

Synthesis of the 3,4,4',5'-tetrakis(hexyloxy)-1,1':2',1'':4'',1'''-quaterphenyl (**QP6**).

Under argon, 4-biphenyl-boric acid (0.19 g, 0.95mmol.), Br-**BP6** (0.40 g, 0.63 mmol),  $K_2CO_3$  (1.74 g, 12.62 mmol.),  $Pd(PPh_3)_4$  (0.07 g, 0.06 mmol), THF (10 mL)/ $H_2O$ (3 mL) were added in a reaction tube. The resulting solution was stirred at 70 °C for 48 h. The reaction mixture was cooled to room temperature and extracted with dichloromethane. The combined organic layers were dried over anhydrous  $MgSO_4$  and concentrated in vacuum. The crude product was separated and purified by silica gel column chromatography with (dichloromethane:petroleum ether = 1:3) as eluent, recrystallization with ethanol and methanol gave white solid **QP6** (0.43 g, yield 97%).  $^1H$  NMR (400 MHz, TMS,  $CDCl_3$ )  $\delta$  (ppm) 7.57 (d,  $J$  = 7.6 Hz, 2H, ArH), 7.50 – 7.38 (m, 4H, ArH), 7.32 (t,  $J$  = 7.3 Hz, 1H, ArH), 7.21 (d,  $J$  = 8.0 Hz, 2H, ArH), 6.98 (s, 2H, ArH), 6.79 (s, 2H, ArH), 6.55 (s, 1H, ArH), 4.13 – 4.03 (m, 4H,  $OCH_2$ ), 3.96 (t,  $J$  = 6.7 Hz, 2H,  $OCH_2$ ), 3.61 (t,  $J$  = 6.7 Hz, 2H,  $OCH_2$ ), 1.89 - 1.76(m, 6H,  $CH_2$ ), 1.59 (d,  $J$  = 14.8 Hz, 2H,  $CH_2$ ), 1.50 - 1.42 (m, 6H,  $CH_2$ ), 1.36 - 1.21 (m, 18H,  $CH_2$ ), 0.99 – 0.78 (m, 12H,  $CH_3$ ).  $^{13}C$  NMR (151 MHz,  $CDCl_3$ )  $\delta$  (ppm) 148.49, 148.23, 147.69, 140.93, 140.80, 138.83, 134.17, 133.05, 132.51, 130.35, 128.75, 127.17, 126.92, 126.59, 121.86, 116.33, 116.03, 116.13, 113.29.

Synthesis of 2,3,6,7-tetrakis(hexyloxy)-10-phenyltriphenylene (**BTP6**). To a stirred solution of **QP6** (0.20 g, 0.28 mmol) was added in 100 mL reaction tube and  $CH_2Cl_2$  (30 mL) was added, a solution of  $FeCl_3$  (0.07 g, 0.42 mmol) in  $CH_3NO_2$  (10 mL) was added. The resulting solution was stirred at room temperature until completion of the reaction. The reaction mixture was quenched with methanol and extracted with dichloromethane. The combined organic layers were dried over anhydrous  $MgSO_4$  and concentrated in vacuo. The residue was purified by column chromatography on silica gel with (dichloromethane:petroleum ether = 1:4.5) mixture as eluent. Recrystallization with ethanol and ethyl acetate gave white solid **BTP6** (0.15 g, yield 77 %).  $^1H$  NMR (400 MHz, TMS,  $CDCl_3$ )  $\delta$  (ppm) 8.63 (s, 1H, ArH), 8.54 (d,  $J$  = 8.4 Hz, 1H, ArH), 8.08 (s, 1H, ArH), 8.03 (s, 1H, ArH), 7.85 (s, 2H, ArH), 7.80 (d,  $J$  = 7.4 Hz, 3H, ArH), 7.54 (t,  $J$  = 7.4 Hz, 2H, ArH), 7.43 (t,  $J$  = 7.1 Hz, 1H, ArH), 4.26 (t,  $J$  = 5.9 Hz, 8H,  $OCH_2$ ), 2.00 – 1.93 (m, 6H,  $CH_2$ ), 1.59 (s, 8H,  $CH_2$ ), 1.41 (d,  $J$  = 2.7 Hz, 14H,  $CH_2$ ), 1.26 (s, 4H,  $CH_2$ ), 0.96 - 0.88 (m, 12H,  $CH_3$ ).  $^{13}C$  NMR (151 MHz,  $CDCl_3$ )  $\delta$  (ppm) 149.53, 141.64, 138.74, 128.91, 127.54, 127.33, 125.23, 124.49, 123.52, 121.43, 107.05. HRMS (MALDI) calcd for  $C_{48}H_{64}O_4$   $[M]^+$  m/z: 704.4805 (100%), 705.4838 (51.9%), 706.4872 (13.2%), 707.4905 (2.2%); found 704.4810 (100%), 705.4840 (49%), 706.4870 (11%), 707.4901 (2%).

## 2.6 Synthesis of 1,2,3,4-tetrafluoro-6,7,10,11-tetrakis(octyloxy)triphenylene, 4F-TP8

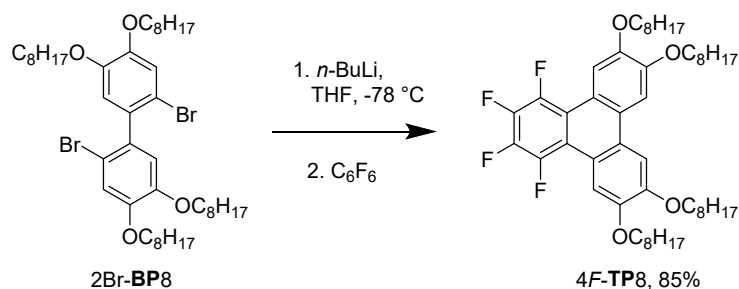

**Scheme S5.** Preparation of the tetrafluorotriphenylenes, 4F-TP8.

2,2'-Dibromo-4,4',5,5'-tetrakis(octyloxy)-1,1'-biphenyl (2Br-**BP8**, 3.00 g, 4.21 mmol) was weighed in 50 mL reaction tubes and solvent THF (10 mL) was added under protection of argon. *n*-Butyllithium (2.5 M hexane, 16.80 mmol) was slowly injected into the reaction tube with a syringe at -78 °C. After reacting for 2 h perfluorobenzene (1.57 g, 8.44 mmol) was added into the reaction mixture and continued to react at -78 °C for 0.5 h, then the resulting solution was stirred at room temperature for 10 h. The reaction mixture was extracted with chloroform, the combined organic layers were dried with anhydrous MgSO<sub>4</sub> and concentrated in vacuo. The crude product was purified by silica gel column chromatography with (dichloromethane:petroleum ether = 1:3) as eluent, recrystallization with ethyl acetate and ethanol gave white solid (2.48 g, yield 85%). <sup>1</sup>H NMR (400 MHz, TMS, CDCl<sub>3</sub>) δ (ppm) 8.35 (s, 2H, ArH), 7.77 (s, 2H, ArH), 4.25 – 4.15 (m, 8H, OCH<sub>2</sub>), 1.99 – 1.89 (m, 8H, CH<sub>2</sub>), 1.62 – 1.51 (m, 10H, CH<sub>2</sub>), 1.47 – 1.30 (m, 30H, CH<sub>2</sub>), 0.90 (t, *J* = 6.8 Hz, 12H, CH<sub>3</sub>). <sup>19</sup>F NMR (565 MHz, TMS, CDCl<sub>3</sub>) δ (ppm) -139.87 (d, *J* = 13.2 Hz, 2F, ArF), -159.69 (t, *J* = 22.8 Hz, 2F, ArF).

### 2.7 Synthesis of 2-aryl-1,3,4-trifluorotriphenylene derivatives

1,2,4-Trifluoro-3-(naphthalen-1-yl)-6,7,10,11-tetrakis(octyloxy)triphenylene (**NAA8**). Under protection of argon, 1-bromonaphthalene (0.10 g, 0.49 mmol) was charged in a 50 mL reaction tube and THF (10 mL) was added. *n*-Butyllithium (2.5 M hexane, 0.97 mmol) was slowly injected into the reaction tube with a syringe at -78 °C and the reaction mixture was stirred at -78 °C for 0.5 h, then continued to react at room temperature for 3 h. 4F-**TP8** (0.20 g, 0.24 mmol) was added and the reaction solution continued under stirring at 55 °C for 10 h. The reaction mixture was cooled to room temperature and extracted with dichloromethane. The combined organic layers were dried over anhydrous MgSO<sub>4</sub> and concentrated in vacuo. The crude product was separated and purified by silica gel column chromatography with (dichloromethane:petroleum ether = 1:3) as eluent; recrystallization with ethyl acetate and ethanol gave white solid (0.17 g, yield 74%). <sup>1</sup>H NMR (400 MHz, TMS, CDCl<sub>3</sub>) δ (ppm) 8.56 (d, *J* = 5.9 Hz, 1H, ArH), 8.42 (d, *J* = 6.3 Hz, 1H, ArH), 8.03 (d, *J* = 7.2 Hz, 1H, ArH), 7.98 (d, *J* = 8.1 Hz, 1H, ArH), 7.85 (s, 2H, ArH), 7.68 – 7.63 (m, 3H, ArH), 7.55 (t, *J* = 7.4 Hz, 1H, ArH), 7.48 (t, *J* = 8 Hz, 1H, ArH), 4.30 – 4.21 (m, 6H, OCH<sub>2</sub>), 4.05 (t, *J* = 6.5 Hz, 2H, OCH<sub>2</sub>), 2.01 – 1.95 (m, 6H, CH<sub>2</sub>), 1.86 – 1.78 (m, 2H, CH<sub>2</sub>), 1.64 – 1.52 (m, 8H, CH<sub>2</sub>), 1.46 – 1.23 (m, 32H, CH<sub>2</sub>), 0.95 – 0.82 (m, 12H, CH<sub>3</sub>). <sup>19</sup>F NMR (565 MHz, TMS, CDCl<sub>3</sub>) δ (ppm) -112.03 (s, 1F, ArF), -138.88 (s, 1F, ArF), -142.18 (s, 1F, ArF). <sup>13</sup>C NMR (151 MHz, CDCl<sub>3</sub>) δ (ppm) 154.13, 152.49, 149.97, 149.35, 148.80, 148.58, 146.17, 145.25, 144.40, 133.65, 132.09, 129.38, 128.93, 128.47, 126.86, 126.73, 126.16, 125.64, 125.41, 125.29, 125.04, 120.33 (d, *J* = 29.6 Hz), 115.74 – 115.36 (m), 111.39 – 111.12 (m), 106.63, 106.23. **HRMS (MALDI)** calcd for C<sub>60</sub>H<sub>79</sub>F<sub>3</sub>O<sub>4</sub> [M]<sup>+</sup> *m/z*: 920.5930 (100.0%), 921.5964 (64.9%), 922.5998 (20.7%); found 920.5936 (100%), 921.5973 (73%). **Elemental Analysis** (C<sub>60</sub>H<sub>79</sub>F<sub>3</sub>O<sub>4</sub>, MW 921.28): calcd C 78.22%, H 8.64%; found C 78.13%, H 8.30%.

1,2,4-Trifluoro-3-(naphthalen-2-yl)-6,7,10,11-tetrakis(octyloxy)triphenylene (**NAB8**). As for **NAA8**: 2-bromonaphthalene (0.10 g, 0.49 mmol), THF (10 mL), *n*-Butyllithium (2.5 M hexane, 0.97 mmol), 4F-**TP8** (0.20 g, 0.24 mmol). Extraction in dichloromethane

and purification by silica gel column chromatography with dichloromethane:petroleum ether = 1:3 as eluent; recrystallization with ethyl acetate and ethanol gave white solid (0.16 g, yield 72%). **<sup>1</sup>H NMR** (400 MHz, TMS, CDCl<sub>3</sub>) δ (ppm) 8.46 (dd, *J* = 15.4, 5.9 Hz, 2H, ArH), 8.11 (s, 1H, ArH), 8.01 (d, *J* = 8.5 Hz, 1H, ArH), 7.95 (dd, *J* = 8.7, 5.3 Hz, 2H, ArH), 7.80 (s, 2H, ArH), 7.71 (d, *J* = 8.3 Hz, 1H, ArH), 7.60 – 7.53 (m, 2H, ArH), 4.29 – 4.09 (m, 8H, OCH<sub>2</sub>), 2.00 – 1.84 (m, 8H, CH<sub>2</sub>), 1.60 – 1.26 (m, 40H, CH<sub>2</sub>), 0.90 – 0.85 (m, 12H, CH<sub>3</sub>). **<sup>19</sup>F NMR** (565 MHz, TMS, CDCl<sub>3</sub>) δ (ppm) -115.30 – -115.61 (m, 1F, ArF) -141.57 (d, *J* = 19.5 Hz, 1F, ArF), -142.22 (t, *J* = 14.4 Hz, 1F, ArF). **<sup>13</sup>C NMR** (151 MHz, CDCl<sub>3</sub>) δ (ppm) 153.70, 152.05, 149.81, 149.26, 148.63, 148.48, 146.20, 144.61, 133.11 (d, *J* = 17.6 Hz), 130.29, 128.33, 127.99 (d, *J* = 26.8 Hz), 127.76, 126.73, 126.63 (d, *J* = 23.2 Hz), 126.37, 125.47, 124.98, 120.58 – 119.82 (m), 116.99, 115.66, 111.46 – 111.22 (m), 106.45 – 106.40 (m), 106.22 (d, *J* = 50.0 Hz). **HRMS (MALDI)** calcd for C<sub>60</sub>H<sub>79</sub>F<sub>3</sub>O<sub>4</sub> [M]<sup>+</sup> *m/z*: 920.5930 (100.0%), 921.5964 (64.9%), 922.5998 (20.7%); found 920.5913 (100%), 921.5973 (73%). **Elemental Analysis** (C<sub>60</sub>H<sub>79</sub>F<sub>3</sub>O<sub>4</sub>, MW 921.28): calcd. C 78.22%, H 8.64%, found C 77.84%, H 8.18%.

1,2,4-Trifluoro-6,7,10,11-tetrakis(octyloxy)-3-(triphenylene-2-yl)triphenylene (**TP8**). As for **NAA8**: 2-bromotriphenylene (0.15 g, 0.49 mmol), THF (10 mL), *n*-Butyllithium (2.5 M hexane, 0.97 mmol), 4F-**TP8** (0.20 g, 0.24 mmol). Extraction in dichloromethane and purification by silica gel column chromatography with (dichloromethane:petroleum ether = 1:3) as eluent; recrystallization with ethyl acetate and ethanol gave white solid (0.18 g, yield 74%). **<sup>1</sup>H NMR** (400 MHz, TMS, CDCl<sub>3</sub>) δ (ppm) 8.92 (s, 1H, ArH), 8.80 – 8.65 (m, 5H, ArH), 8.46 (s, 2H, ArH), 7.89 (d, *J* = 8.1 Hz, 1H, ArH), 7.80 – 7.65 (m, 6H, ArH), 4.29 – 4.08 (m, 8H, OCH<sub>2</sub>), 2.00 – 1.83 (m, 8H, CH<sub>2</sub>), 1.60 – 1.22 (m, 40H, CH<sub>2</sub>), 0.96 – 0.79 (m, 12H, CH<sub>3</sub>). **<sup>19</sup>F NMR** (565 MHz, TMS, CDCl<sub>3</sub>) δ (ppm) -115.42 (d, *J* = 3.3 Hz, 1F, ArF), -141.47 (d, *J* = 18.0 Hz, 1F, ArF), -142.08 (d, *J* = 13.8 Hz, 1F, ArF). **<sup>13</sup>C NMR** (151 MHz, CDCl<sub>3</sub>) δ (ppm) 153.66, 151.99, 149.74, 149.22, 148.58, 148.39, 146.58 – 146.36 (m), 144.96 – 144.53(m), 144.93 (d, *J* = 9.5 Hz), 144.57 (d, *J* = 13.6 Hz), 129.99 (d, *J* = 13.9 Hz), 129.73 (d, *J* = 14.1 Hz), 129.53, 129.35 (d, *J* = 12.2 Hz), 127.91, 127.46 (d, *J* = 11.9 Hz), 127.28, 125.86, 125.41, 124.96, 123.55, 123.42, 123.32 – 123.22 (m), 120.23 – 119.85 (m), 117.04 – 116.76(m), 115.66, 111.38 – 110.78 (m), 106.23, 105.90. **HRMS (MALDI)** calcd for C<sub>68</sub>H<sub>83</sub>F<sub>3</sub>O<sub>4</sub> [M]<sup>+</sup> *m/z*: 1020.6243 (100.0%), 1021.6277 (73.5%), 1022.6311 (26.6%); found 1020.6218 (100%), 1021.6254 (78%). **Elemental Analysis** (C<sub>68</sub>H<sub>83</sub>F<sub>3</sub>O<sub>4</sub>, MW 1021.40): calcd C 79.96%, H 8.19%; found C 79.57%, H 7.92%.

1,2,4-Trifluoro-6,7,10,11-tetrakis(octyloxy)-3-(pyren-1-yl)triphenylene (**PY8**). As for **NAA8**: 1-bromopyrene (0.17 g, 0.61 mmol), THF (10 mL), *n*-Butyllithium (2.5 M hexane, 1.22 mmol), 4F-**TP8** (0.25 g, 0.30 mmol). Extraction in dichloromethane and purification by silica gel column chromatography with (dichloromethane:petroleum ether = 1:3) as eluent, recrystallization with ethyl acetate and ethanol gave white solid (0.24 g, yield 78%). **<sup>1</sup>H NMR** (400 MHz, TMS, CDCl<sub>3</sub>) δ (ppm) 8.58 (d, *J* = 5.7 Hz, 1H, ArH), 8.44 (d, *J* = 6.1 Hz, 1H, ArH), 8.35 (d, *J* = 7.8 Hz, 1H, ArH), 8.27 – 8.14 (m, 5H, ArH), 8.09 – 8.03 (m, 2H, ArH), 7.29 – 7.85 (m, 3H, ArH), 4.31 – 4.24 (m, 6H, OCH<sub>2</sub>), 4.03 (t, *J* = 6.2 Hz, 2H, OCH<sub>2</sub>), 2.03 – 1.93 (m, 6H, CH<sub>2</sub>), 1.83 – 1.76 (m, 2H, CH<sub>2</sub>), 1.63 – 1.52 (m,

8H, CH<sub>2</sub>), 1.43 – 1.18 (m, 32H, CH<sub>2</sub>), 0.95 – 0.86 (m, 9H, CH<sub>3</sub>), 0.80 (d, *J* = 6.9 Hz, 3H, CH<sub>3</sub>). **<sup>19</sup>F NMR** (565 MHz, TMS, CDCl<sub>3</sub>) δ (ppm) -112.03 (d, *J* = 14.0 Hz, 1F, ArF), -138.76 – -138.80 (m, 1F, ArF), -142.07 (t, *J* = 15.1 Hz, 1F, ArF). **<sup>13</sup>C NMR** (151 MHz, CDCl<sub>3</sub>) δ (ppm) 154.21, 152.59, 150.00, 149.36, 148.80, 148.60, 146.17, 145.42, 144.55, 131.82, 131.26, 130.86, 129.93, 128.66, 128.34, 128.18, 127.33, 126.16, 125.64 (d, *J* = 9.2 Hz), 125.45, 125.07, 124.69 (dd, *J* = 31.4, 11.5 Hz), 123.88, 120.52 – 120.26 (m), 116.17 – 115.96 (m), 111.34, 111.14, 106.63, 106.22. **HRMS (MALDI)** calcd for C<sub>66</sub>H<sub>81</sub>F<sub>3</sub>O<sub>4</sub> [M]<sup>+</sup> *m/z*: 994.6087 (100.0%), 995.6121 (71.4%), 996.6154 (25.1%); found 994.6075 (100%), 995.6110 (75%). **Elemental Analysis** (C<sub>66</sub>H<sub>81</sub>F<sub>3</sub>O<sub>4</sub>, MW 995.37): calcd C 79.64%, H 8.20%; found C 79.61%, H 8.06%.

1,2,4-Trifluoro-6,7,10,11-tetrakis(octyloxy)-3-(4-triphenylethylene-yl)triphenylene (**TPE8**). As for **NAA8**: (2-(4-bromophenyl)ethene-1,1,2-triyl)tribenzene (0.25 g, 0.61 mmol), THF (10 mL), *n*-Butyllithium (2.5 M hexane, 1.22 mmol), 4F-TP8 (0.25 g, 0.30 mmol). Extraction in dichloromethane and purification by silica gel column chromatography with dichloromethane:petroleum ether = 1:3 as eluent; recrystallization with ethyl acetate and ethanol gave white solid (0.24 g, yield 75%). **<sup>1</sup>H NMR** (400 MHz, TMS, CDCl<sub>3</sub>) δ (ppm) 8.50 (d, *J* = 5.9 Hz, 1H, ArH), 8.44 (d, *J* = 6.3 Hz, 1H, ArH), 7.83 (s, 2H, ArH), 7.57 – 7.52 (m, 1H, ArH), 7.44 – 7.42 (m, 2H, ArH), 7.38 – 7.27 (m, 5H, ArH), 7.15 – 7.06 (m, 5H, ArH), 7.00 (t, *J* = 6.2 Hz, 3H, ArH), 6.84 – 6.76 (m, 3H, ArH), 4.28 – 4.12 (m, 8H, OCH<sub>2</sub>), 1.99 – 1.85 (m, 8H, CH<sub>2</sub>), 1.57 – 1.27 (m, 40H, CH<sub>2</sub>), 0.95 – 0.83 (m, 12H, CH<sub>3</sub>). **<sup>19</sup>F NMR** (565 MHz, TMS, CDCl<sub>3</sub>) δ (ppm) -115.34 – -115.61 (m, 1F, ArF), -141.25 – -141.48 (m, 1F, ArF), -142.48 (t, *J* = 14.5 Hz, 1F, ArF). **<sup>13</sup>C NMR** (151 MHz, CDCl<sub>3</sub>) δ (ppm) 153.54, 151.87, 149.91, 149.33, 148.65 (d, *J* = 16.4 Hz), 143.98, 143.18, 142.19, 141.12, 140.09, 137.40, 130.81 (d, *J* = 8.5 Hz), 130.16, 129.91 (d, *J* = 21.3 Hz), 129.19 (d, *J* = 8.0 Hz), 127.93, 127.67, 127.50 (d, *J* = 27.8 Hz), 127.06, 126.75, 126.49, 125.57, 125.05, 120.50, 120.28, 119.71, 117.13, 115.66, 111.62, 111.38, 111.18, 106.67, 106.36. **HRMS (MALDI)** calcd for C<sub>76</sub>H<sub>91</sub>F<sub>3</sub>O<sub>4</sub> [M]<sup>+</sup> *m/z*: 1124.6869 (100%), 1125.6903 (82.2%), 1126.6937 (33.3%); found 1124.6863 (100%), 1125.6903 (88%). **Elemental Analysis** (C<sub>76</sub>H<sub>91</sub>F<sub>3</sub>O<sub>4</sub>, MW 1125.56): calcd C 81.10%, H 8.15%; found C 80.87%, H 7.95%.

1,2,4-Trifluoro-6,7,10,11-tetrakis(octyloxy)-3-(benzo[b]thiophene-2-yl)triphenylene (**BT8**). As for **NAA8**: 2-bromobenzo[b]thiophene (0.13 g, 0.61 mmol), THF (10 mL), *n*-Butyllithium (2.5 M hexane, 0.97 mmol), 4F-TP8 (0.25 g, 0.30 mmol). Extraction in dichloromethane and purification by silica gel column chromatography with (dichloromethane:petroleum ether = 1:3) as eluent; recrystallization with ethyl acetate and ethanol gave white solid (0.18 g, yield 63%). **<sup>1</sup>H NMR** (600 MHz, TMS, CDCl<sub>3</sub>) δ (ppm) 8.43 (d, *J* = 5.5 Hz, 2H, ArH), 7.91 (t, *J* = 8.8 Hz, 2H, ArH), 7.84 (s, 1H, ArH), 7.78 (d, *J* = 7.8 Hz, 2H, ArH), 7.45 – 7.38 (m, 2H, ArH), 4.26 – 4.16 (m, 8H, OCH<sub>2</sub>), 1.98 – 1.85 (m, 8H, CH<sub>2</sub>), 1.58 – 1.55 (m, 10H, CH<sub>2</sub>), 1.42 – 1.32 (m, 30H, CH<sub>2</sub>), 0.91 – 0.87 (m, 12H, CH<sub>3</sub>). **<sup>19</sup>F NMR** (565 MHz, TMS, CDCl<sub>3</sub>) δ (ppm) -111.56 (d, *J* = 10.3 Hz, 1F, ArF), -138.50 (d, *J* = 18.5 Hz, 1F, ArF), -141.97 (t, *J* = 13.3 Hz, 1F, ArF). **<sup>13</sup>C NMR** (151 MHz, CDCl<sub>3</sub>) δ (ppm) 154.88, 153.19, 149.64, 148.49, 132.30, 130.74, 129.59, 128.16, 127.49, 127.33, 126.48, 126.15, 125.76, 124.82, 123.77 – 123.59 (m), 120.77, 118.67,

118.19, 112.99 – 111.92 (m), 106.83. **HRMS (MALDI)** calcd for  $C_{58}H_{77}F_3O_4S [M]^+$  m/z: 926.5495 (100%), 927.5528 (62.7%), 928.5562 (19.3%); found 926.5506 (100%), 927.5546 (65%), 928.5580 (21%). **Elemental Analysis** ( $C_{58}H_{77}F_3O_4S$ , MW 927.31): calcd C 75.12%, H 8.37%, S 3.46%; found C 74.69%, H 8.30%, S 3.44%.

### 3. $^1H$ NMR

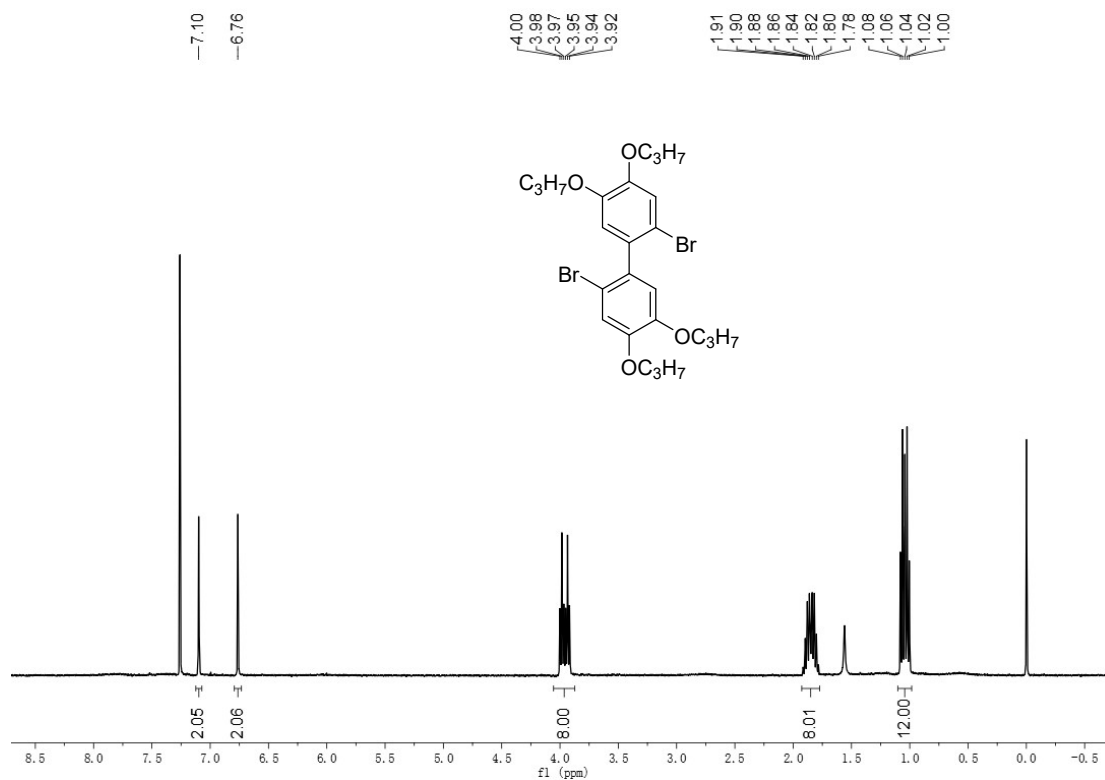

**Figure S1**  $^1H$  NMR ( $CDCl_3$ , 400MHz) spectrum of 2Br-BP3.



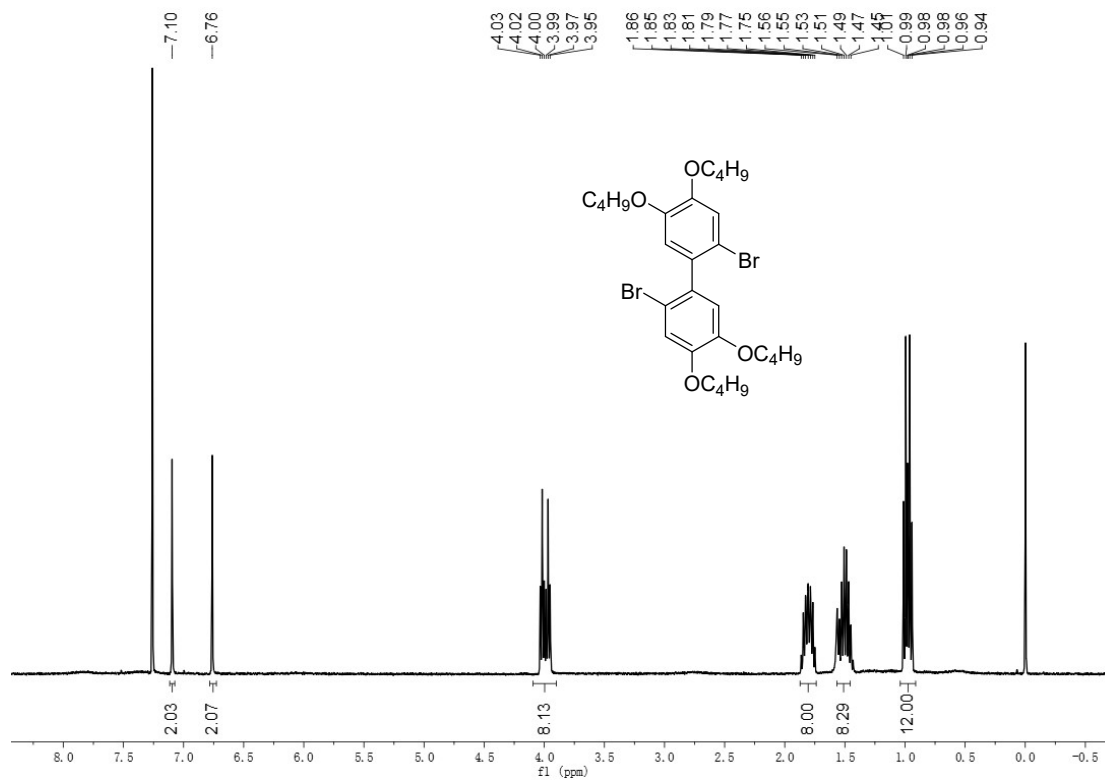

Figure S2  $^1\text{H}$  NMR ( $\text{CDCl}_3$ , 400 MHz) spectrum of 2Br-BP4.

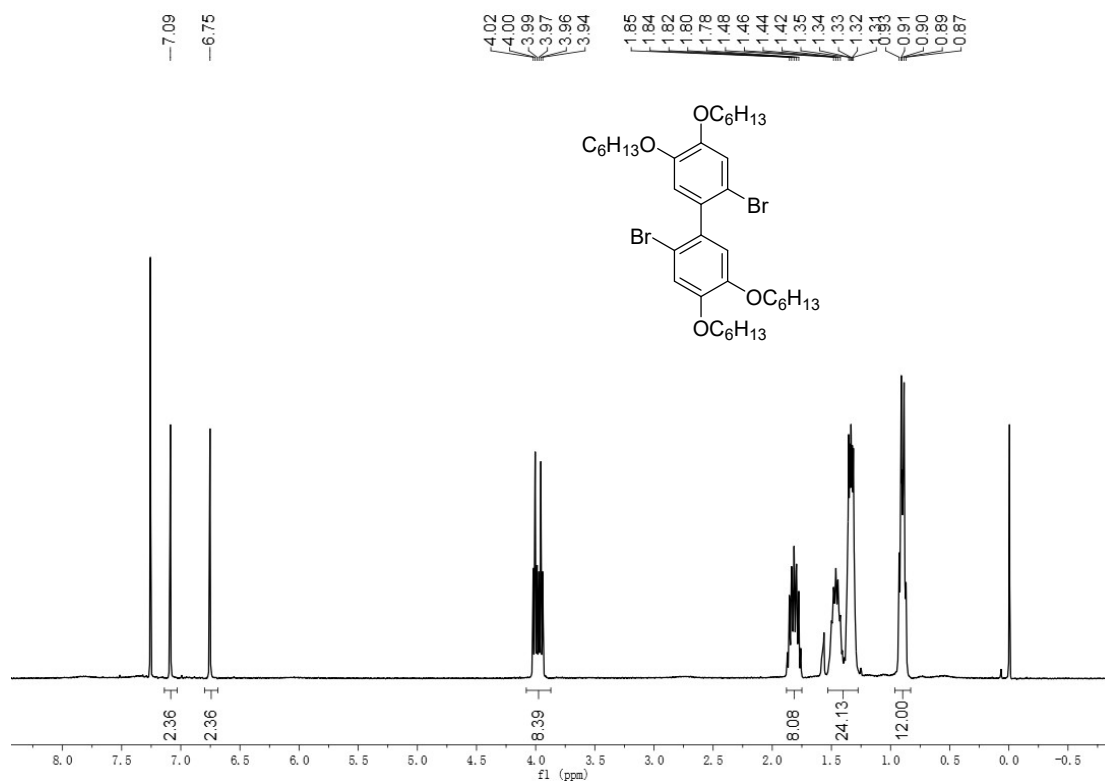

Figure S3  $^1\text{H}$  NMR ( $\text{CDCl}_3$ , 400 MHz) spectrum of 2Br-BP6.

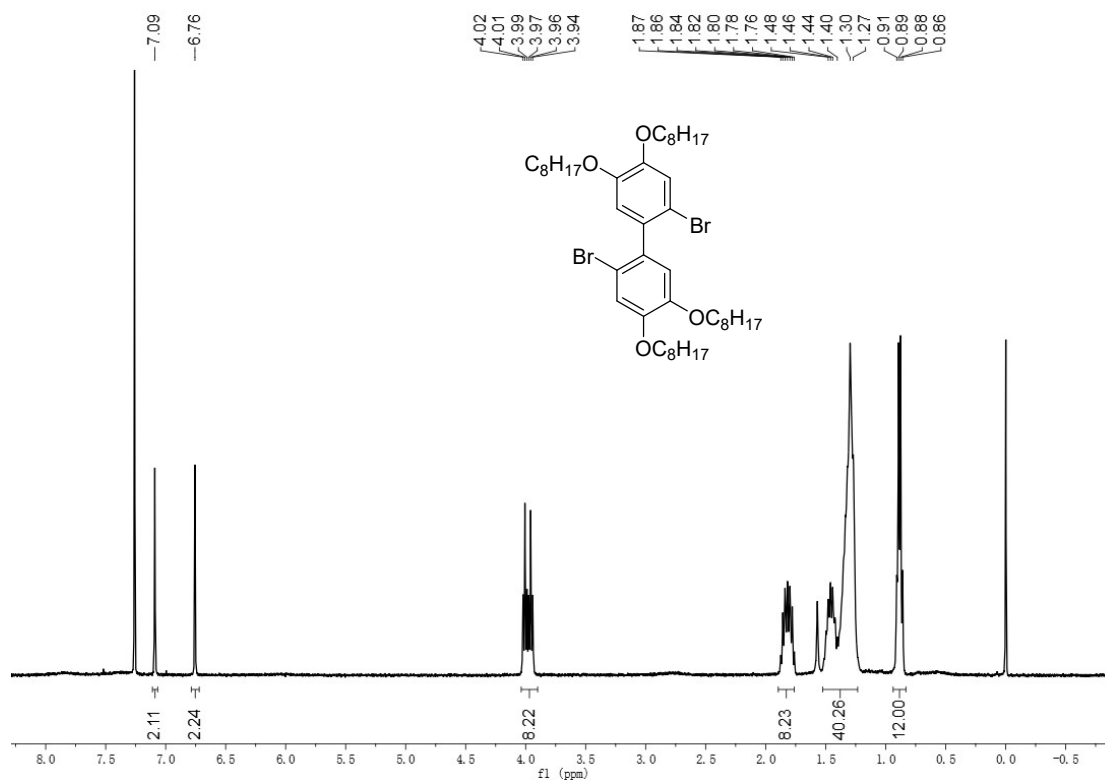

Figure S4  $^1\text{H}$  NMR ( $\text{CDCl}_3$ , 400 MHz) spectrum of 2Br-BP8.

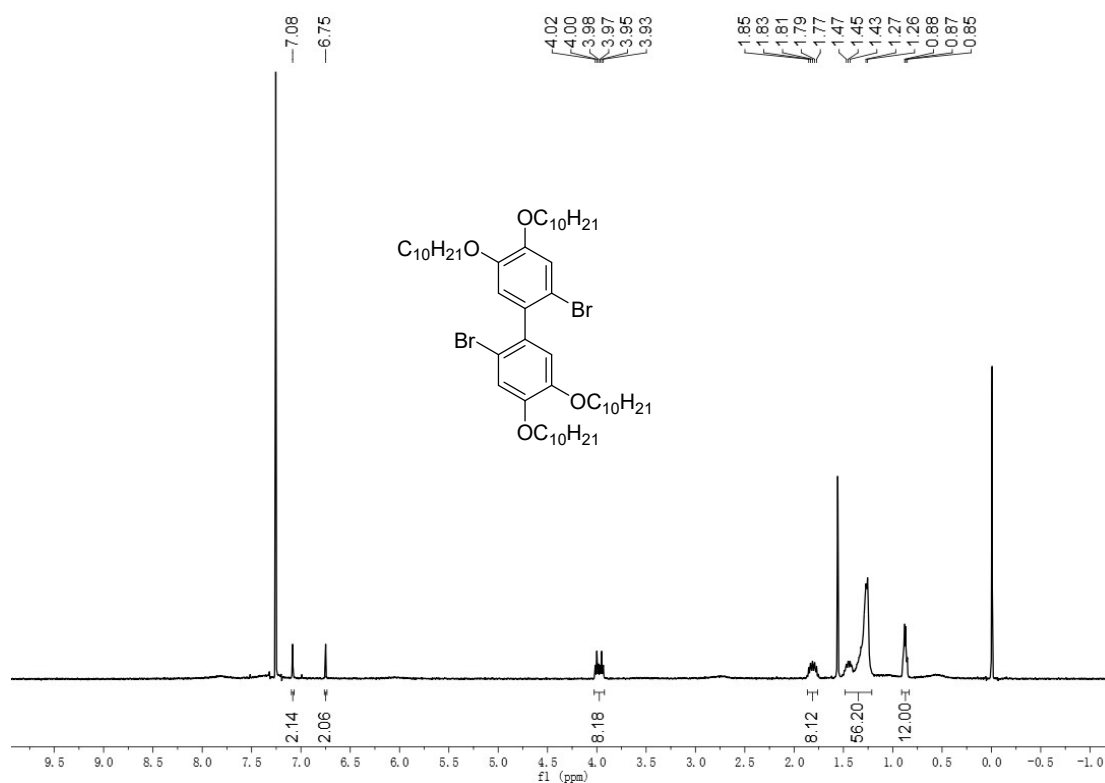

Figure S5  $^1\text{H}$  NMR ( $\text{CDCl}_3$ , 400 MHz) spectrum of 2Br-BP10.

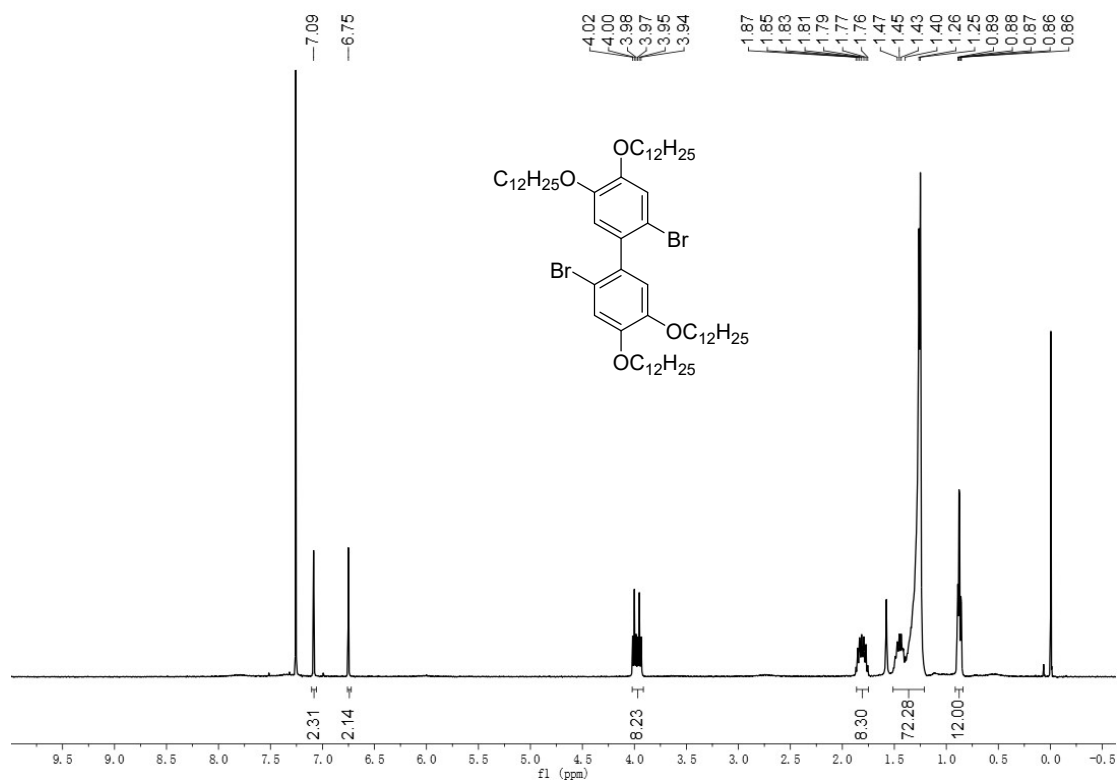

Figure S6 <sup>1</sup>H NMR (CDCl<sub>3</sub>, 400 MHz) spectrum of 2Br-BP12.

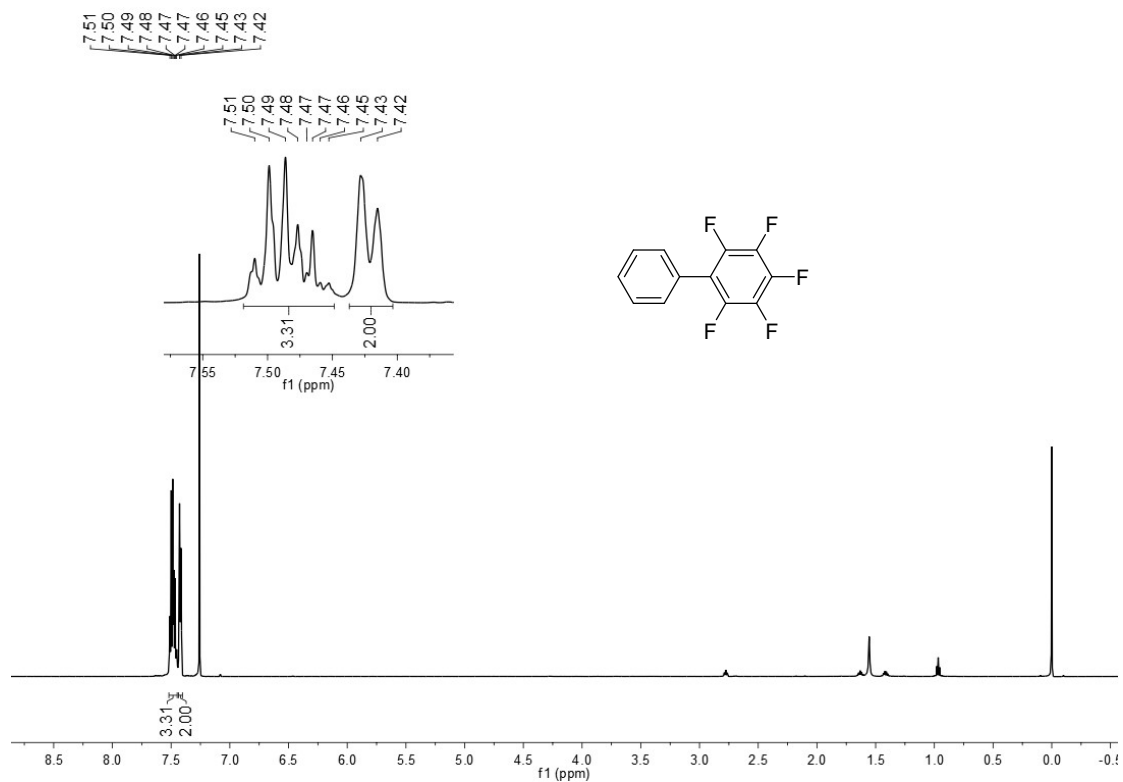

Figure S7 <sup>1</sup>H NMR (CDCl<sub>3</sub>, 600 MHz) spectrum of Ph-C<sub>6</sub>F<sub>5</sub>.

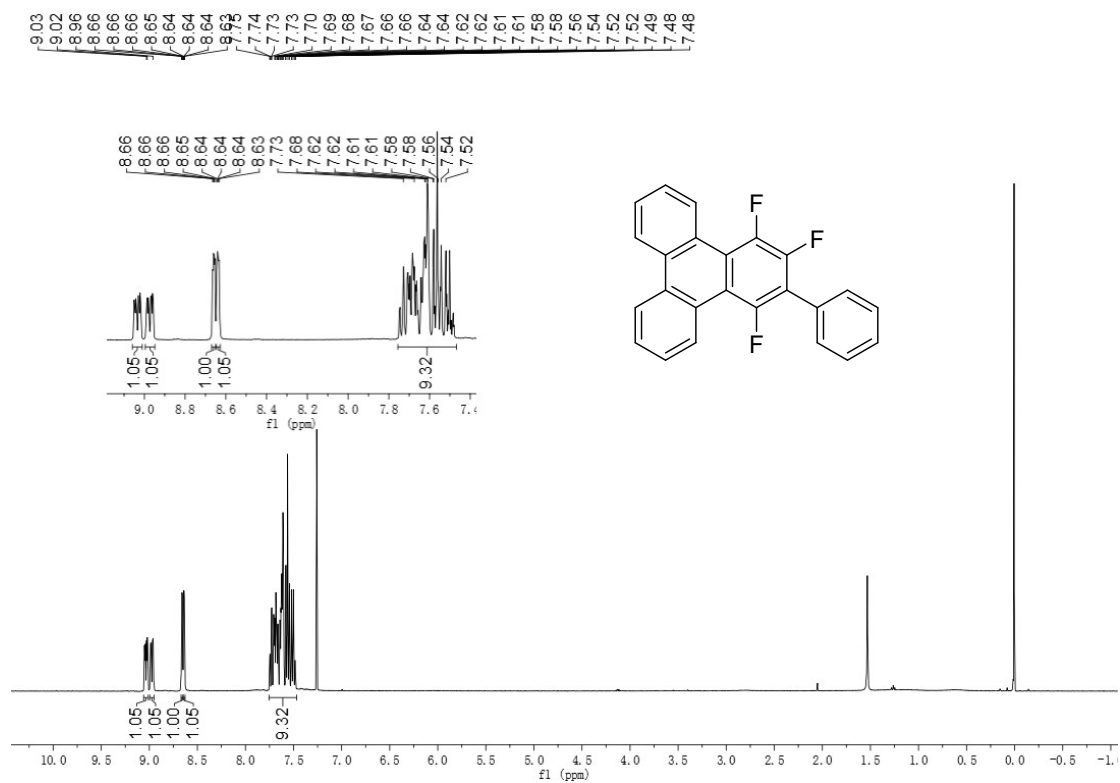

Figure S8 <sup>1</sup>H NMR (CDCl<sub>3</sub>, 400MHz) spectrum of PH0.

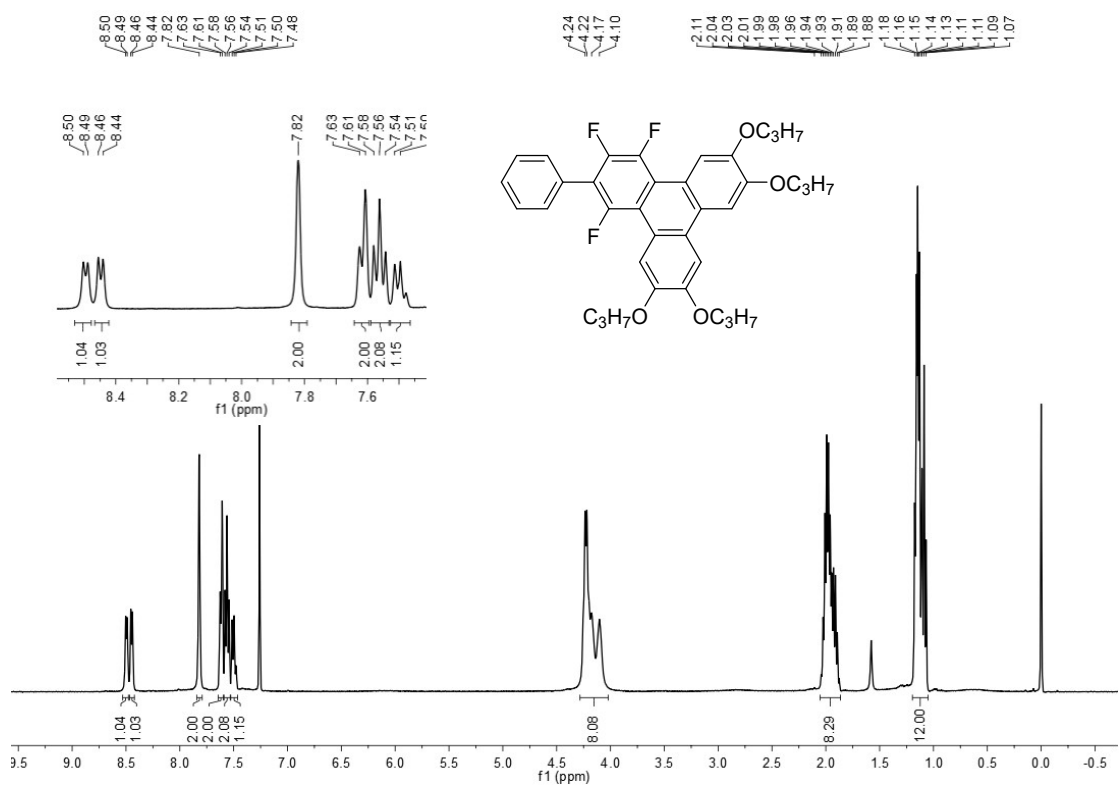

Figure S9 <sup>1</sup>H NMR (CDCl<sub>3</sub>, 400 MHz) spectrum of PH3.

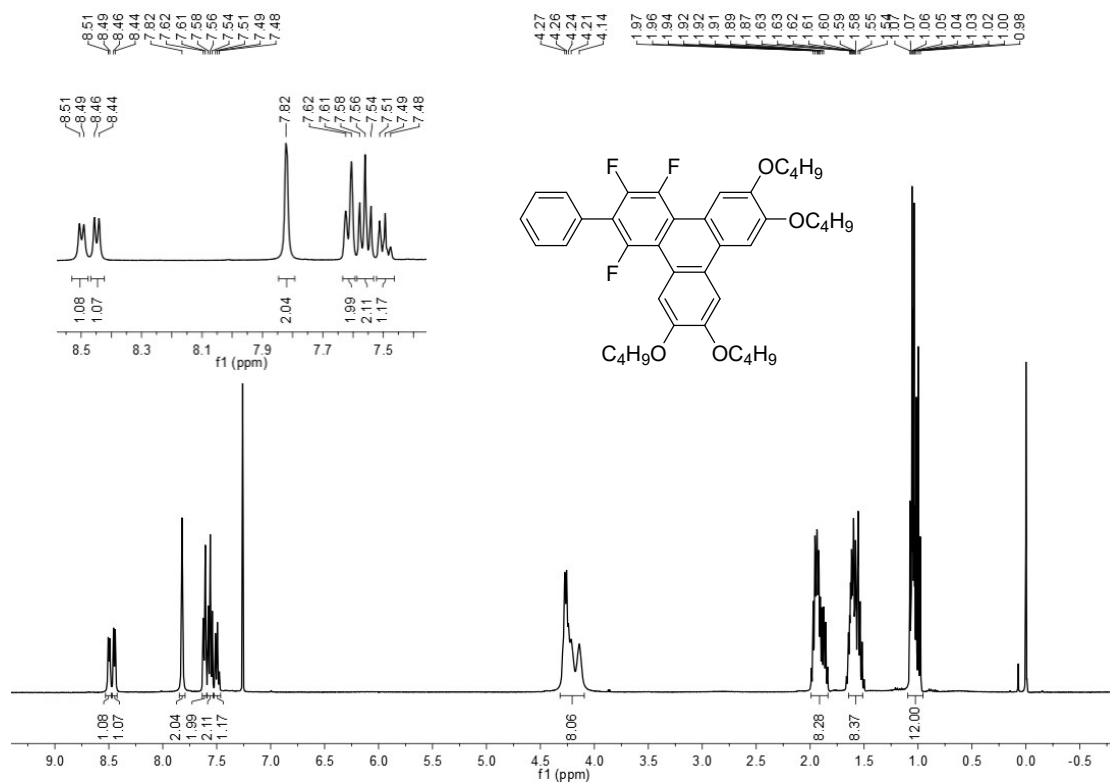

Figure S10  $^1\text{H}$  NMR ( $\text{CDCl}_3$ , 400 MHz) spectrum of PH4.

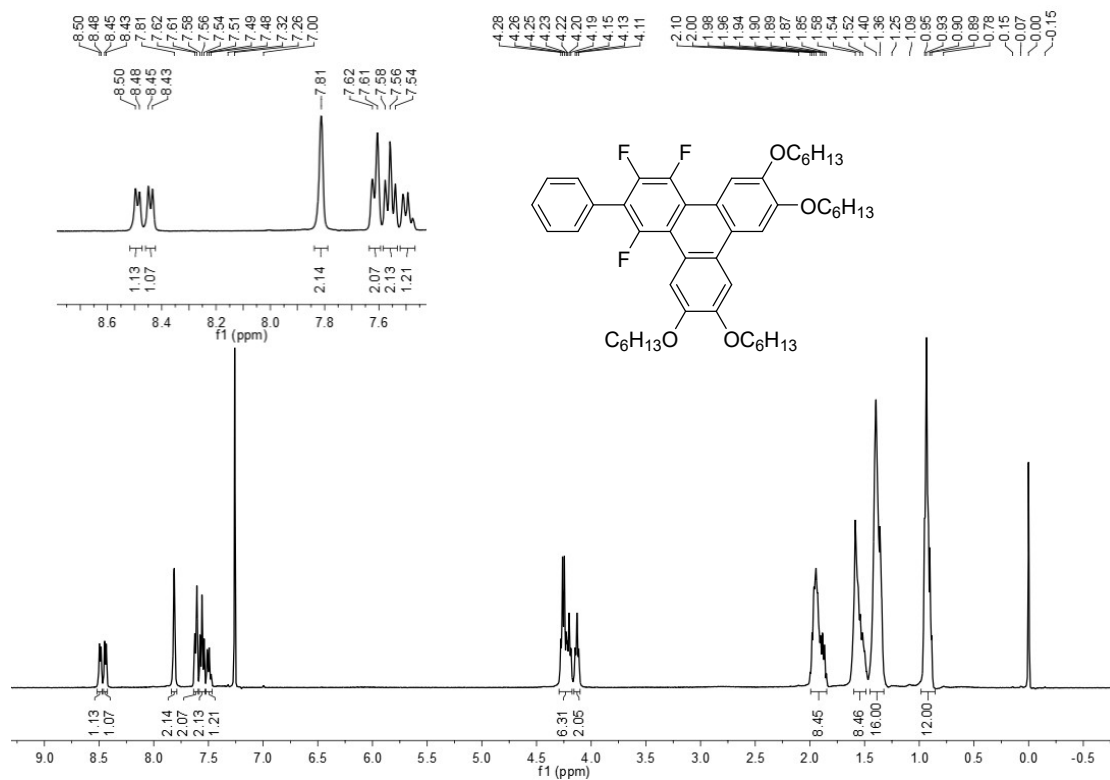

Figure S11  $^1\text{H}$  NMR ( $\text{CDCl}_3$ , 400 MHz) spectrum of PH6.

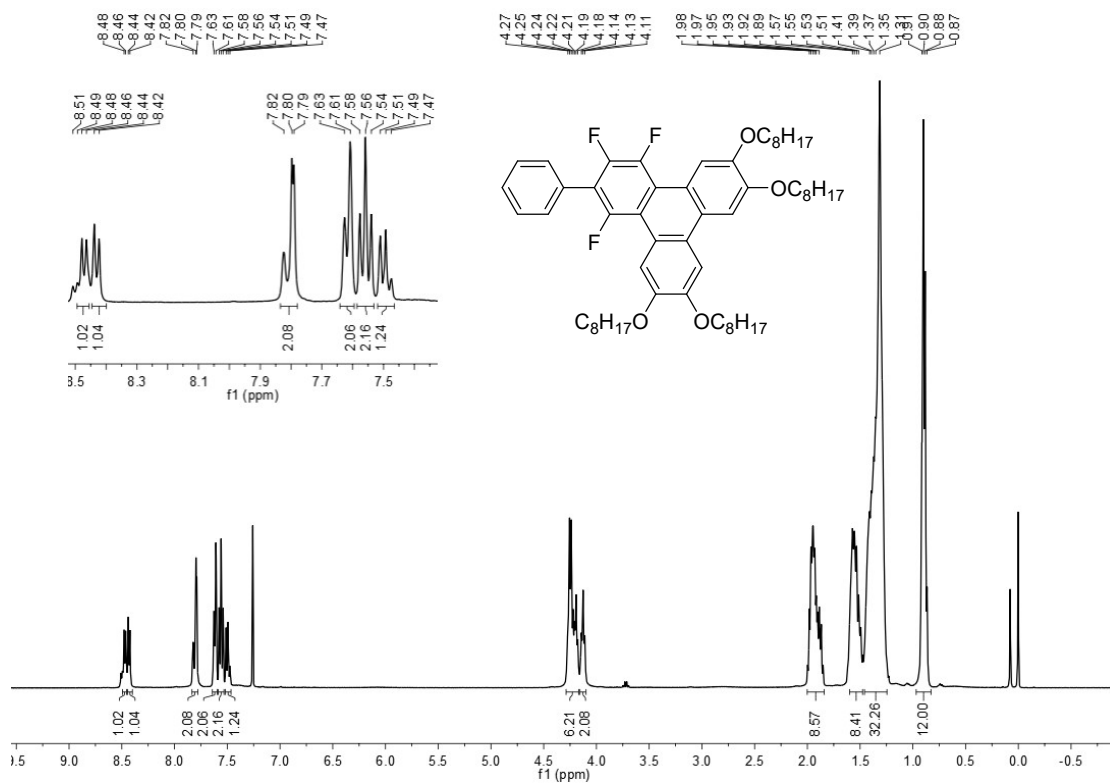

**Figure S12**  $^1\text{H}$  NMR ( $\text{CDCl}_3$ , 400 MHz) spectrum of **PH8**.

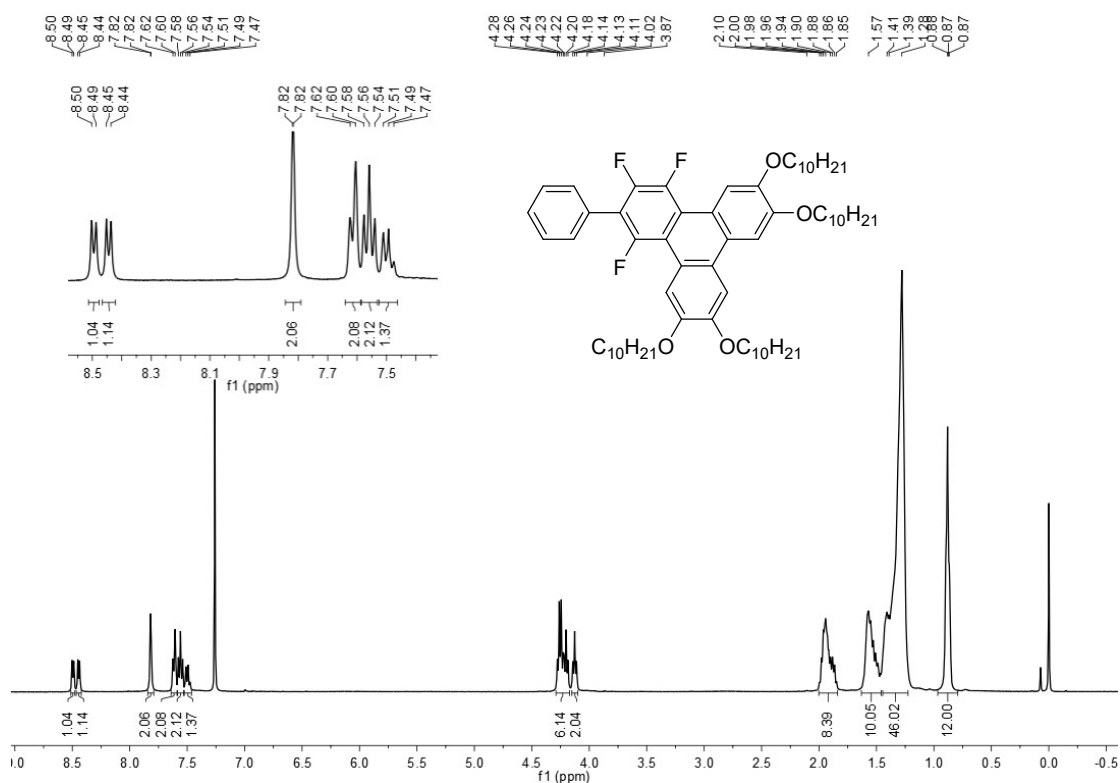

**Figure S13**  $^1\text{H}$  NMR ( $\text{CDCl}_3$ , 400 MHz) spectrum of **PH10**.

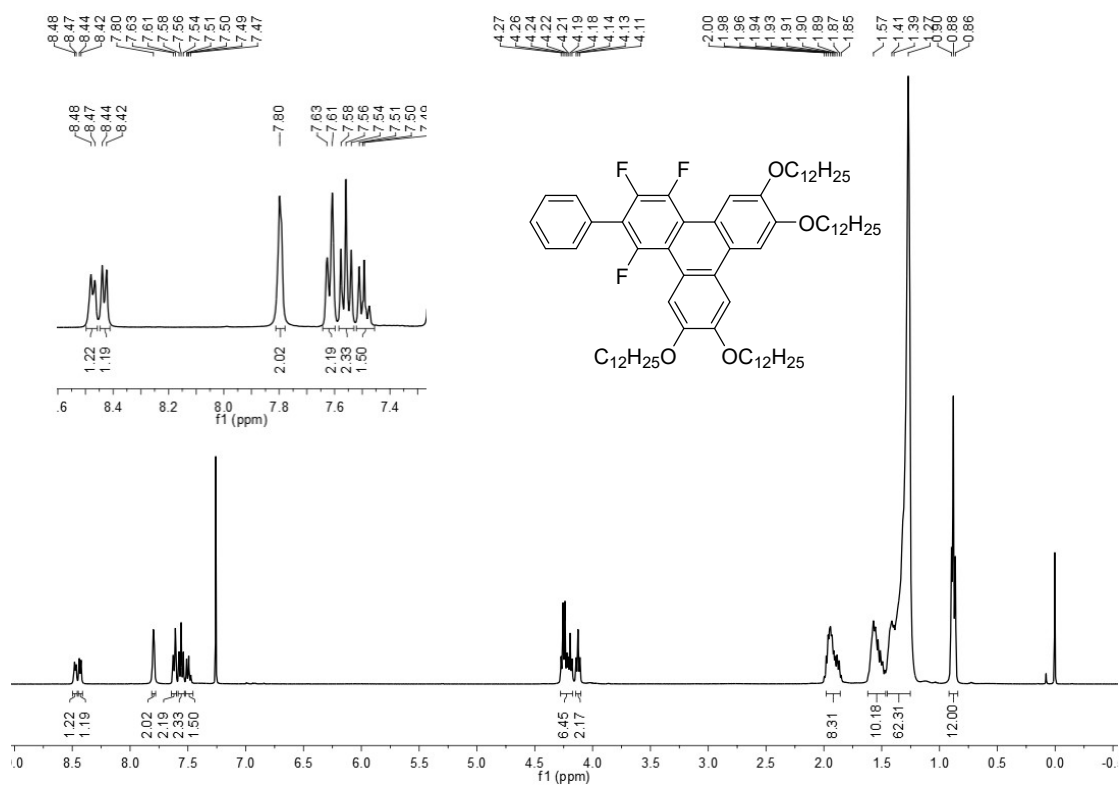

Figure S14 <sup>1</sup>H NMR (CDCl<sub>3</sub>, 400 MHz) spectrum of PH12.

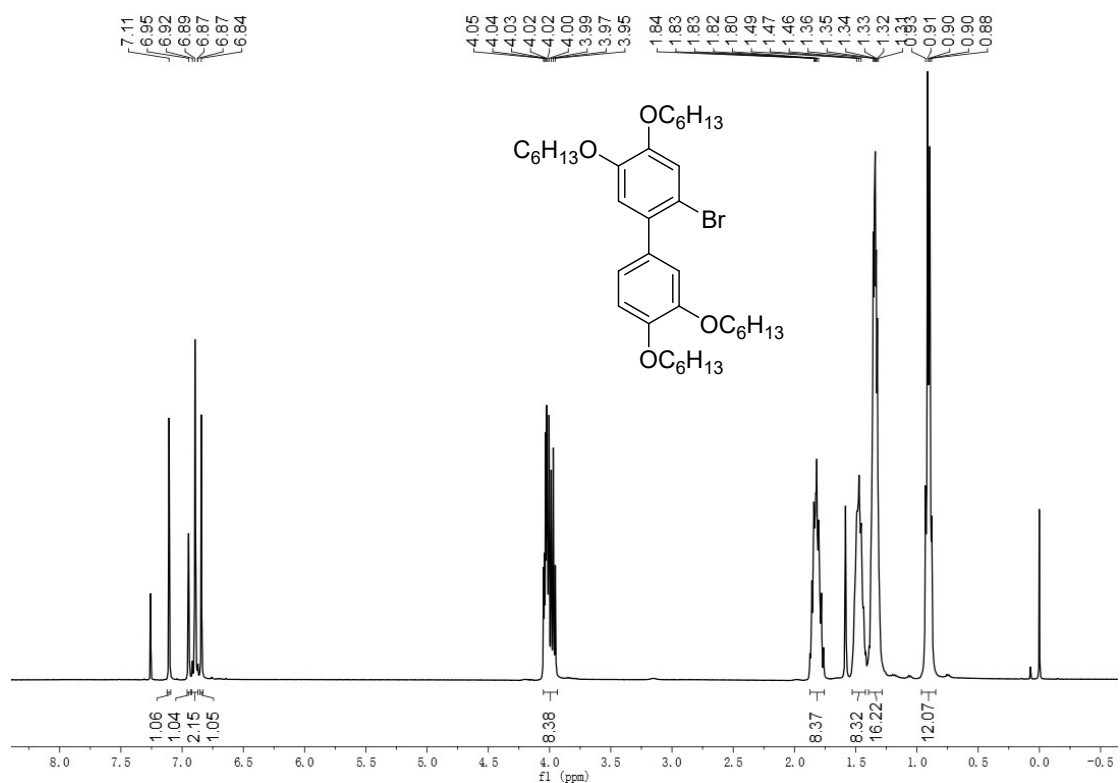

Figure S15 <sup>1</sup>H NMR (CDCl<sub>3</sub>, 400 MHz) spectrum of Br-BP6.

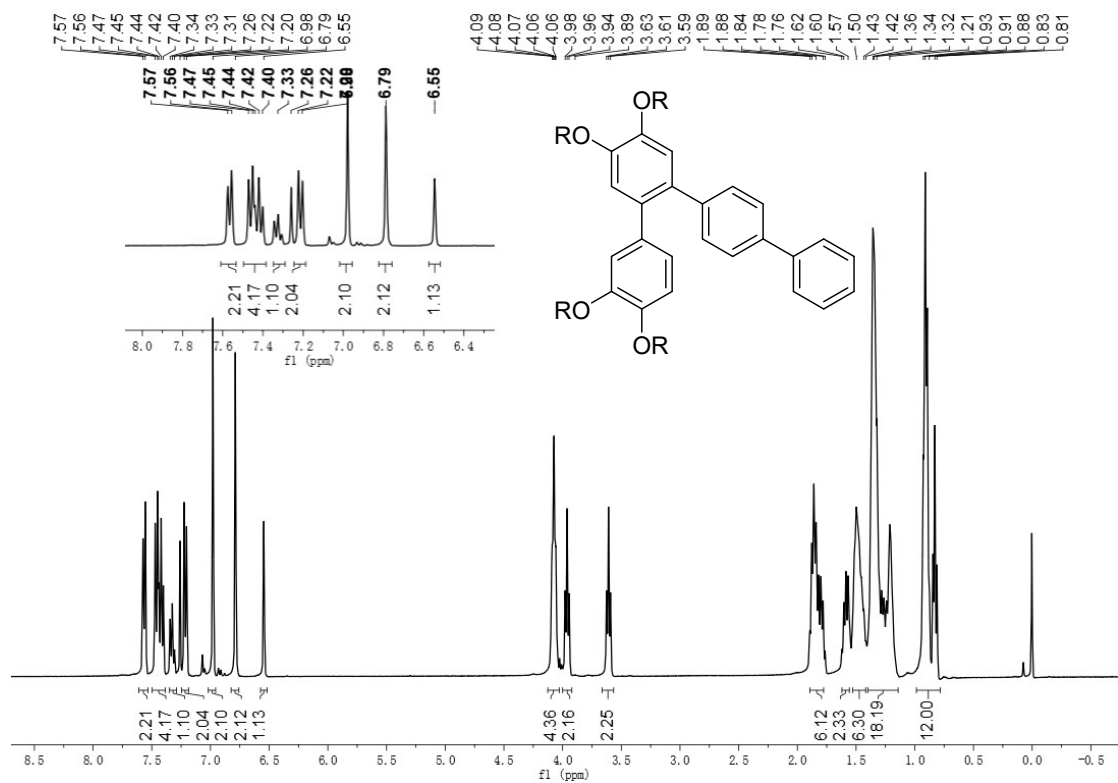

**Figure S16**  $^1\text{H}$  NMR ( $\text{CDCl}_3$ , 400 MHz) spectrum of QP6.

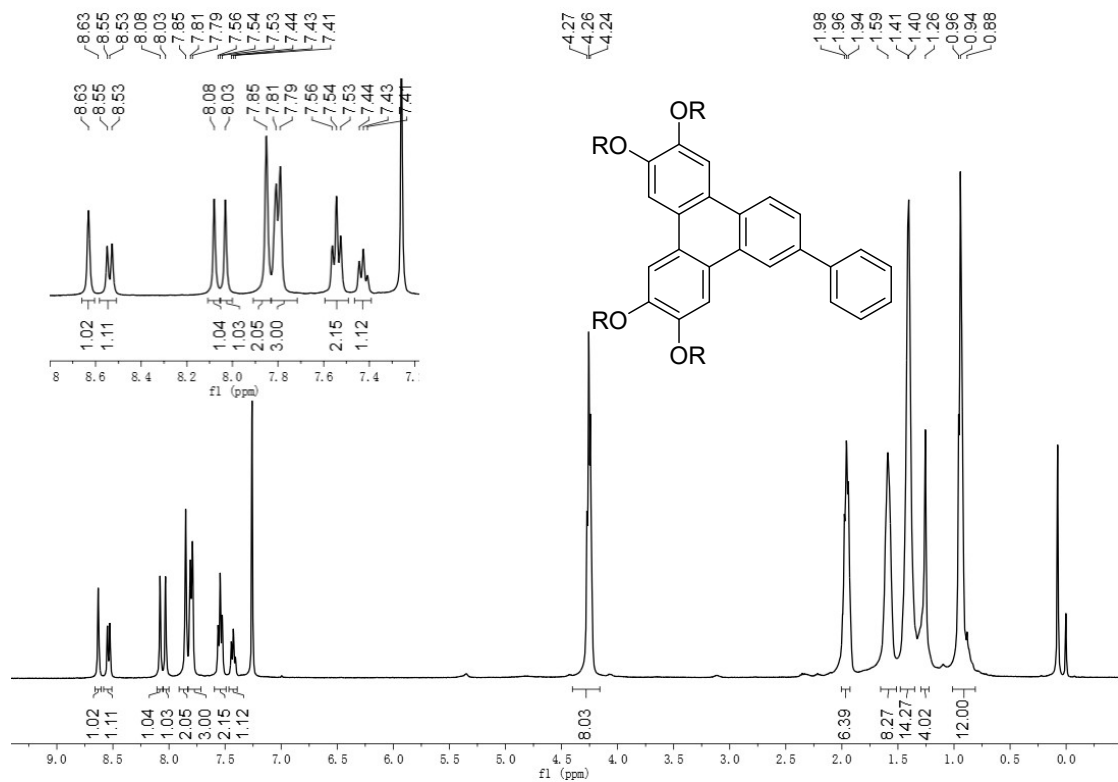

**Figure S17**  $^1\text{H}$  NMR ( $\text{CDCl}_3$ , 400 MHz) spectrum of BTP6.



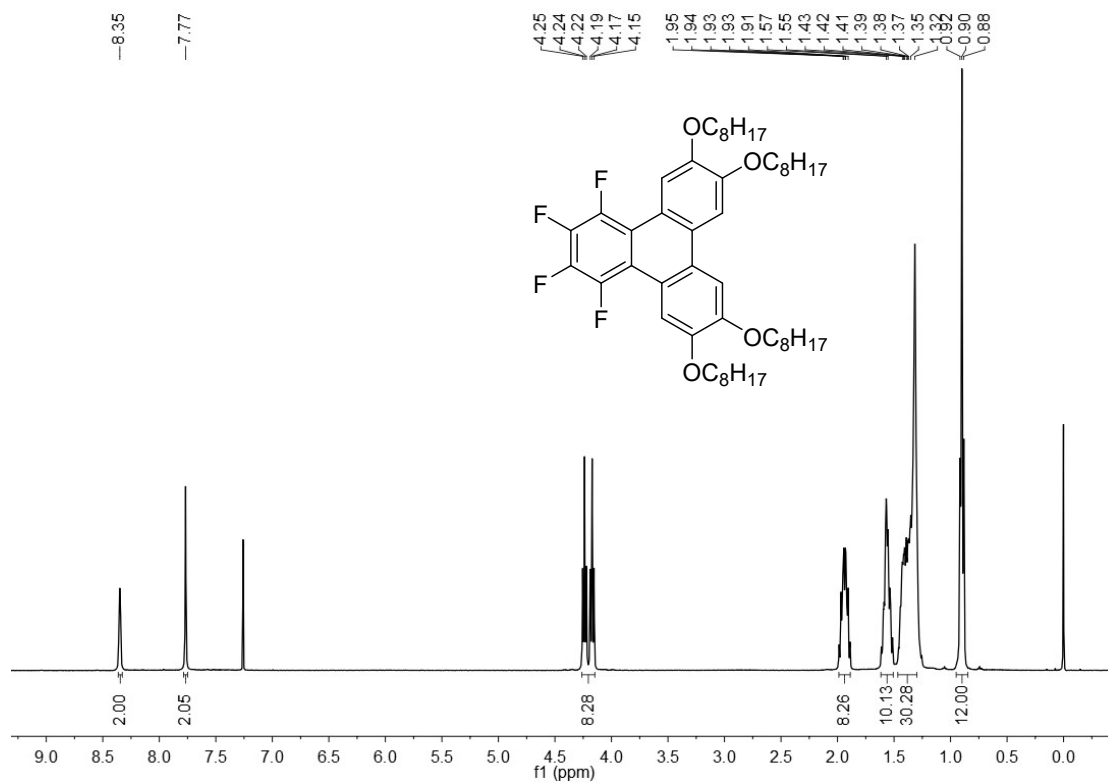

Figure S18  $^1\text{H}$  NMR ( $\text{CDCl}_3$ , 400 MHz) spectrum of 4F-TP8.

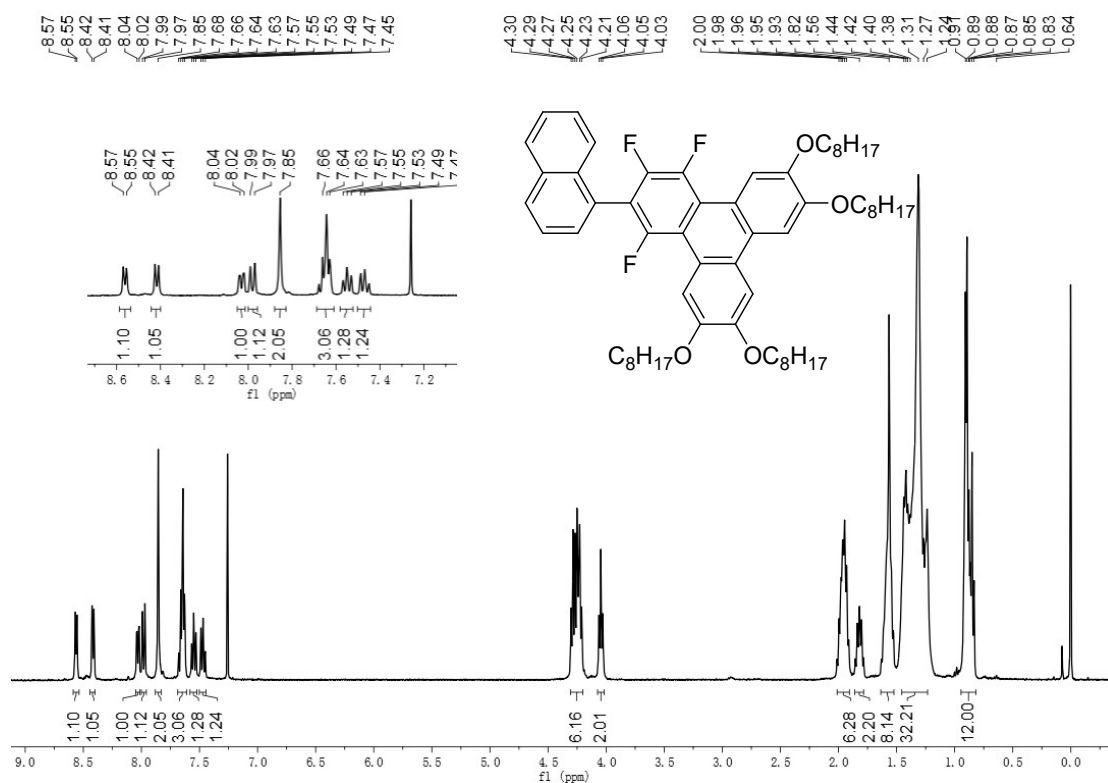

Figure S19  $^1\text{H}$  NMR ( $\text{CDCl}_3$ , 400 MHz) spectrum of NAA8.

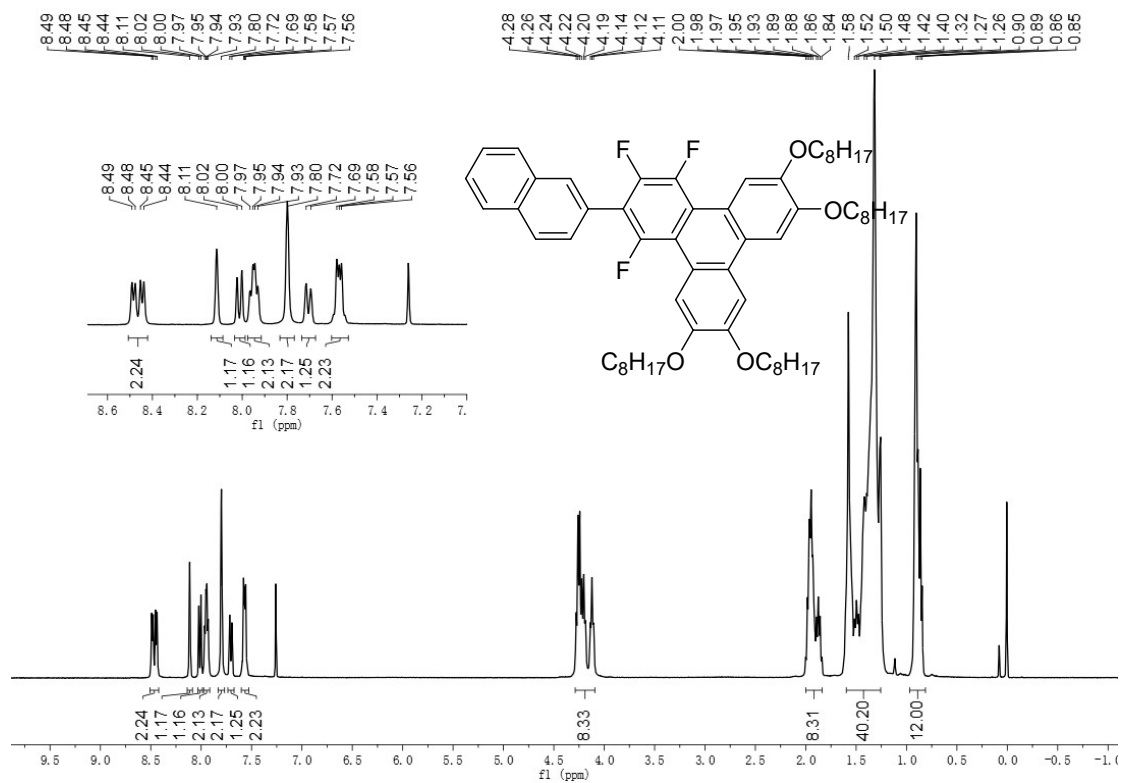

**Figure S20**  $^1\text{H}$  NMR ( $\text{CDCl}_3$ , 400 MHz) spectrum of **NAB8**.

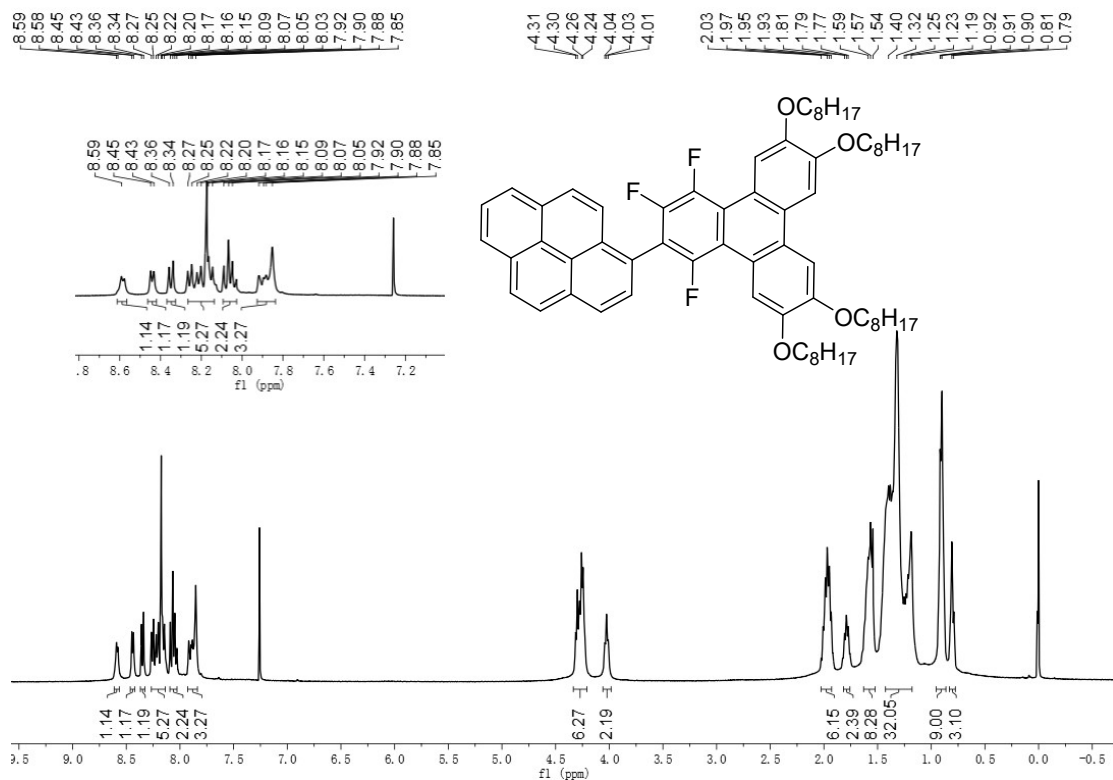

**Figure S21**  $^1\text{H}$  NMR ( $\text{CDCl}_3$ , 400 MHz) spectrum of **PY8**.

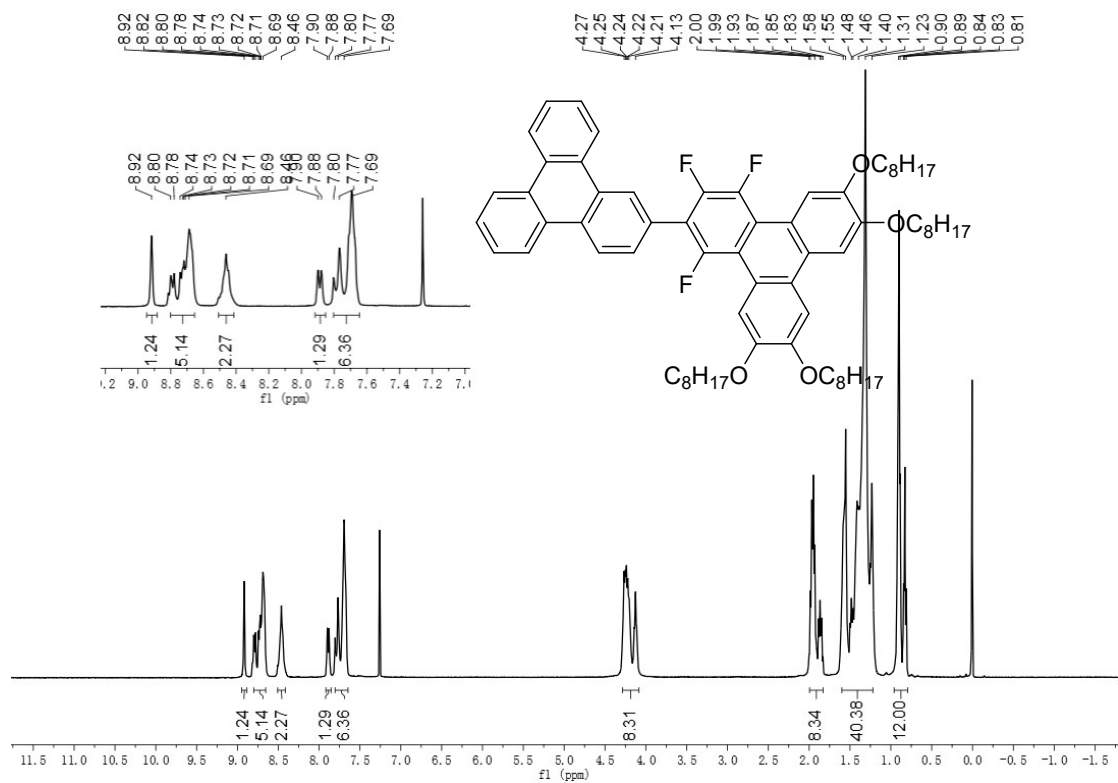

Figure S22 <sup>1</sup>H NMR (CDCl<sub>3</sub>, 400 MHz) spectrum of TP8.

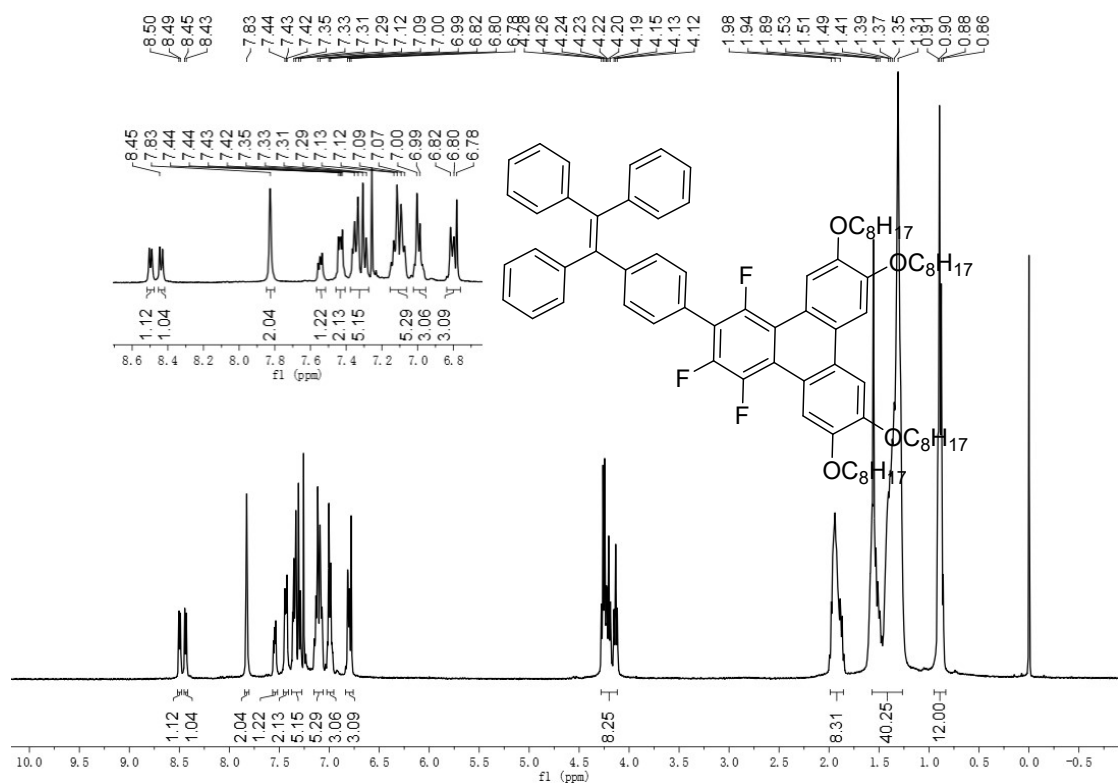

Figure S23 <sup>1</sup>H NMR (CDCl<sub>3</sub>, 400 MHz) spectrum of TPE8.

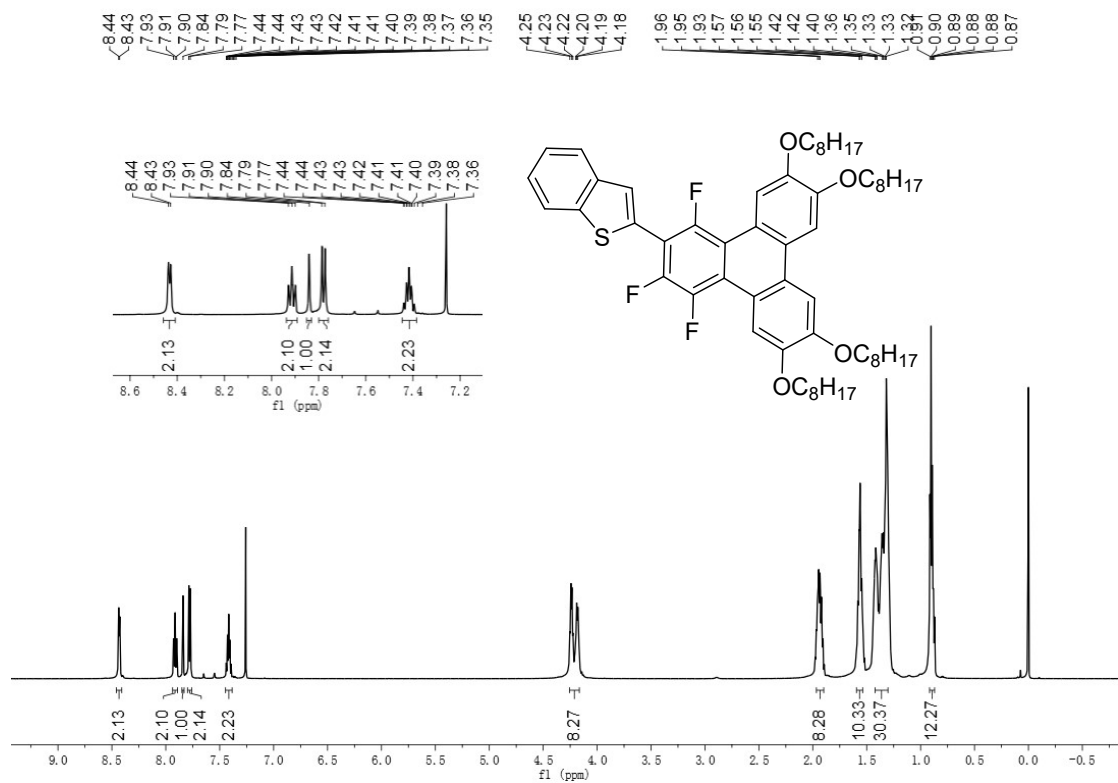

Figure S24 <sup>1</sup>H NMR (CDCl<sub>3</sub>, 400 MHz) spectrum of BT8.

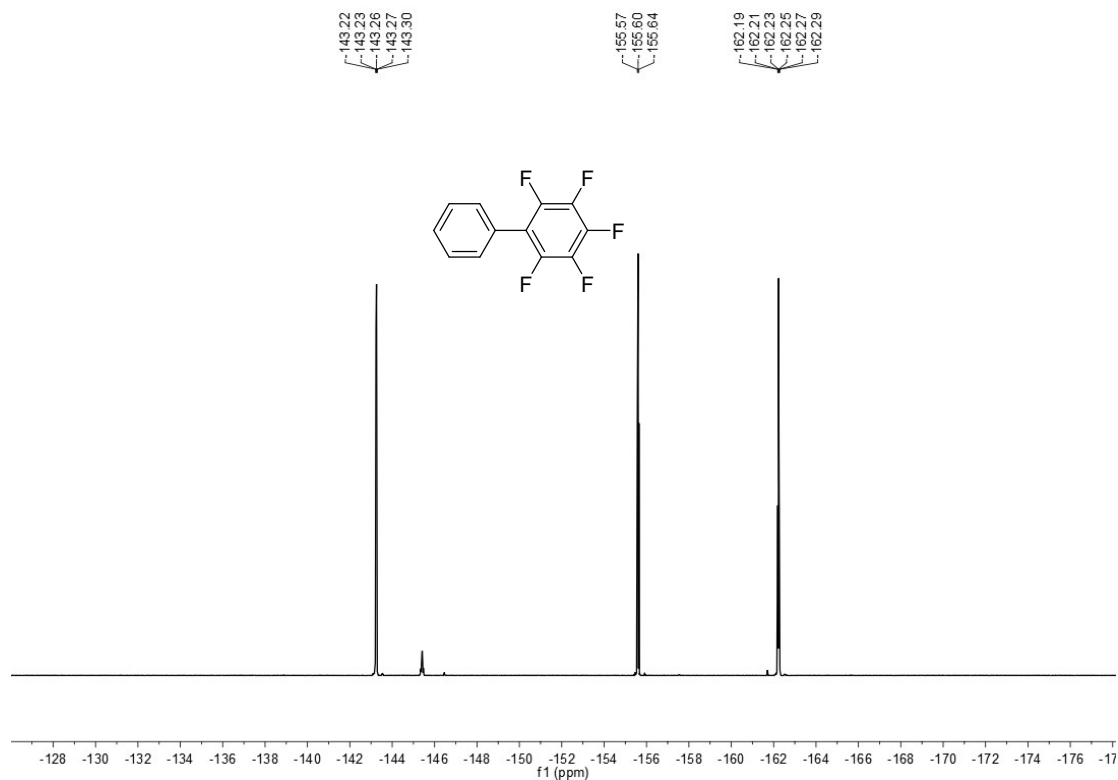

Figure S25 <sup>19</sup>F NMR (CDCl<sub>3</sub>, 565 MHz) spectrum of Ph-C<sub>6</sub>F<sub>5</sub>.

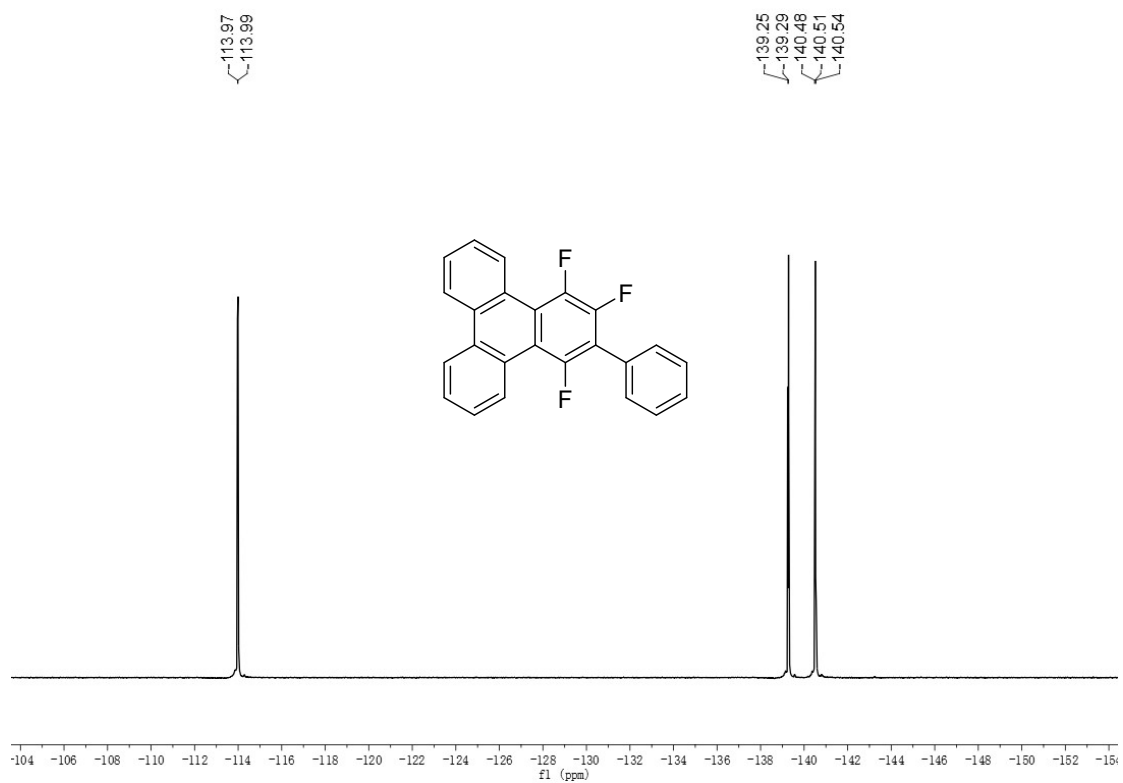

Figure S26 <sup>19</sup>F NMR (CDCl<sub>3</sub>, 565 MHz) spectrum of PH0.

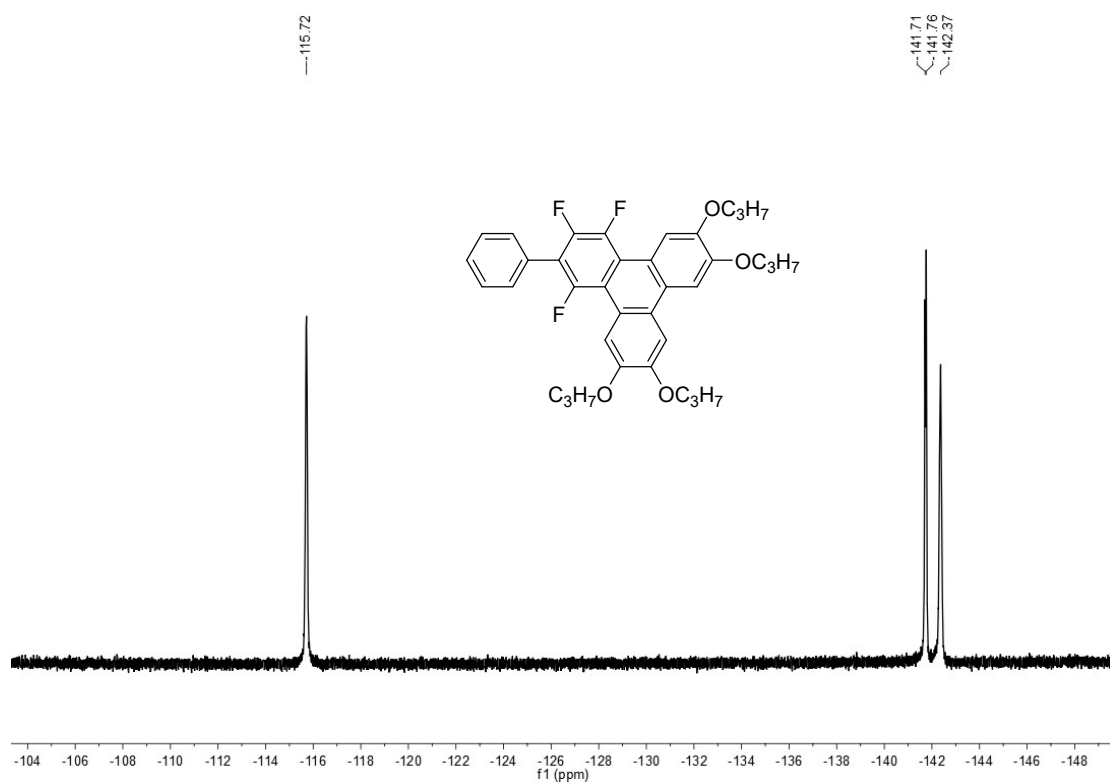

Figure S27 <sup>19</sup>F NMR (CDCl<sub>3</sub>, 376 MHz) spectrum of PH3.

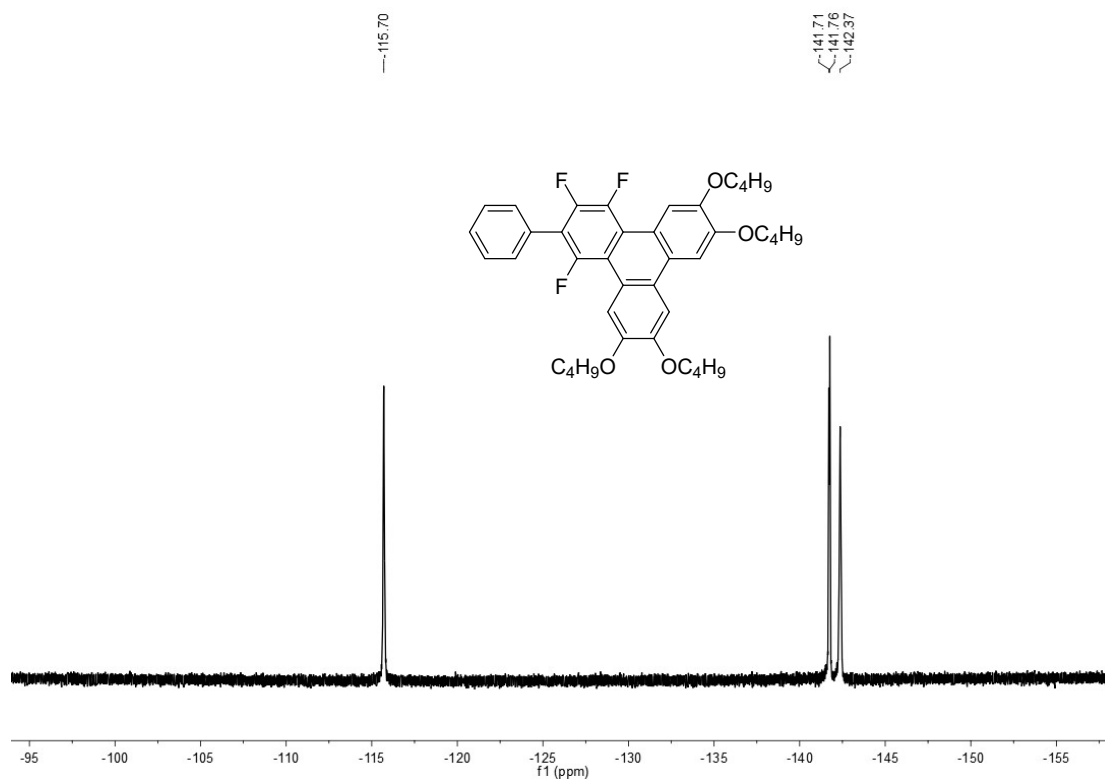

Figure S28  $^{19}\text{F}$  NMR (CDCl<sub>3</sub>, 376 MHz) spectrum of PH4.

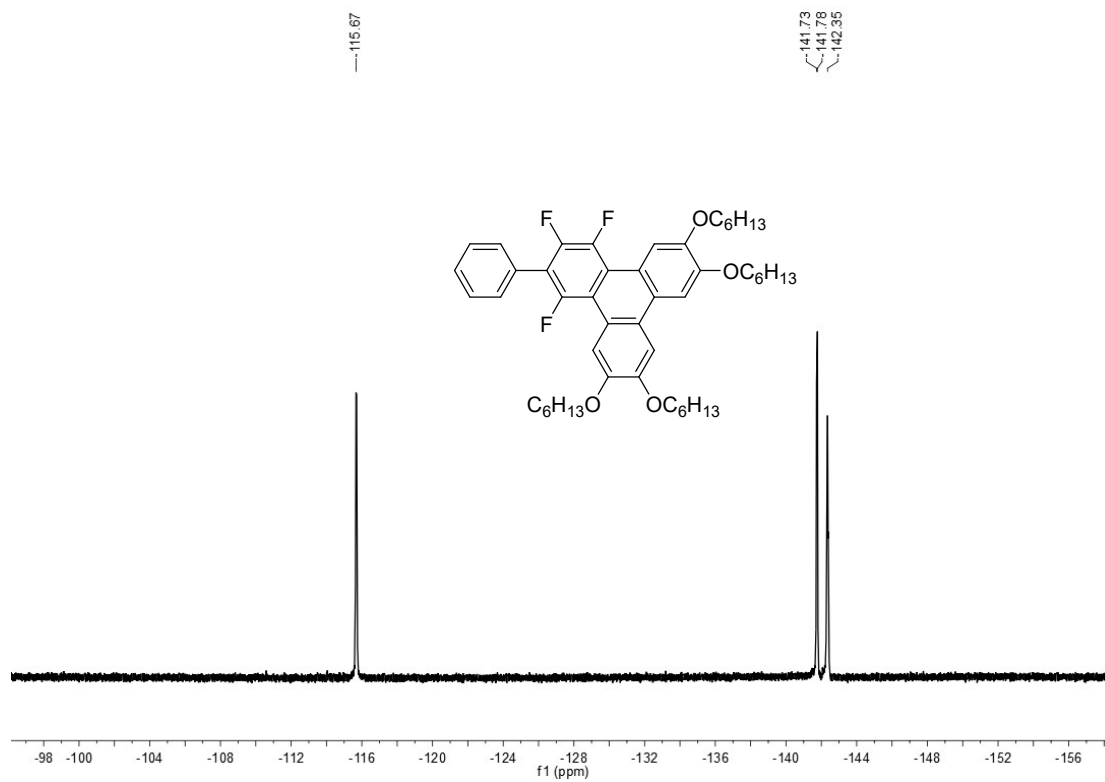

Figure S29  $^{19}\text{F}$  NMR (CDCl<sub>3</sub>, 376 MHz) spectrum of PH6.

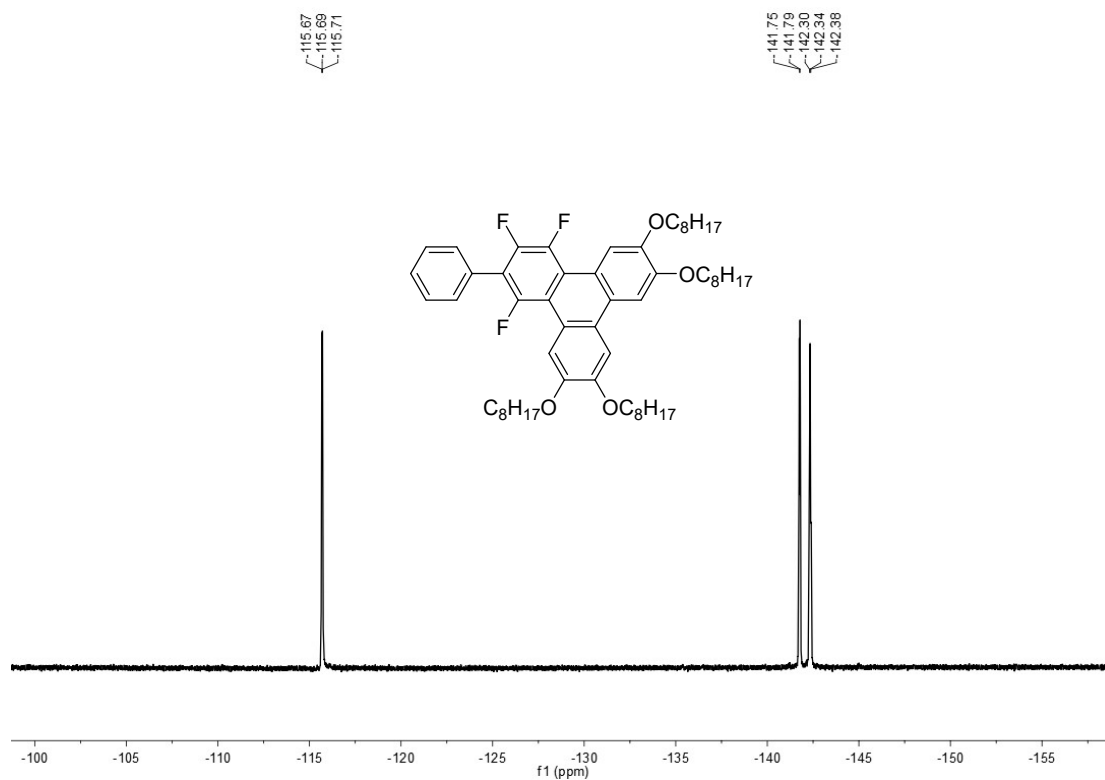

Figure S30 <sup>19</sup>F NMR (CDCl<sub>3</sub>, 376 MHz) spectrum of PH8.

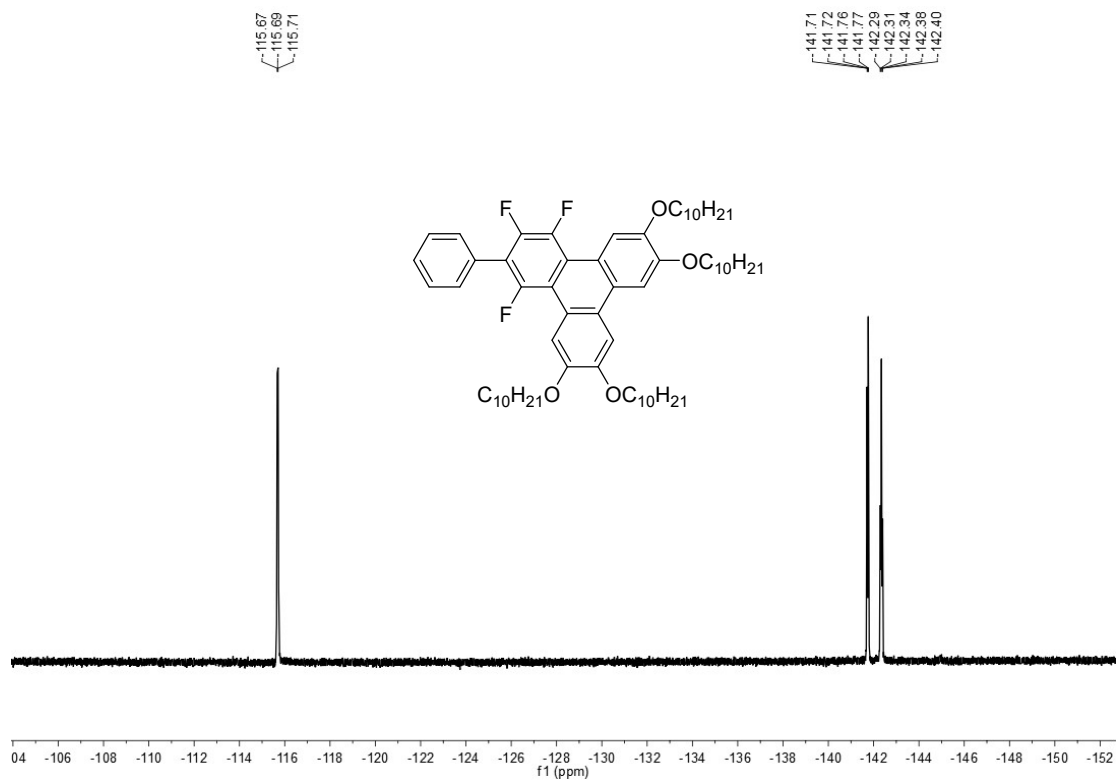

Figure S31 <sup>19</sup>F NMR (CDCl<sub>3</sub>, 376 MHz) spectrum of PH10.

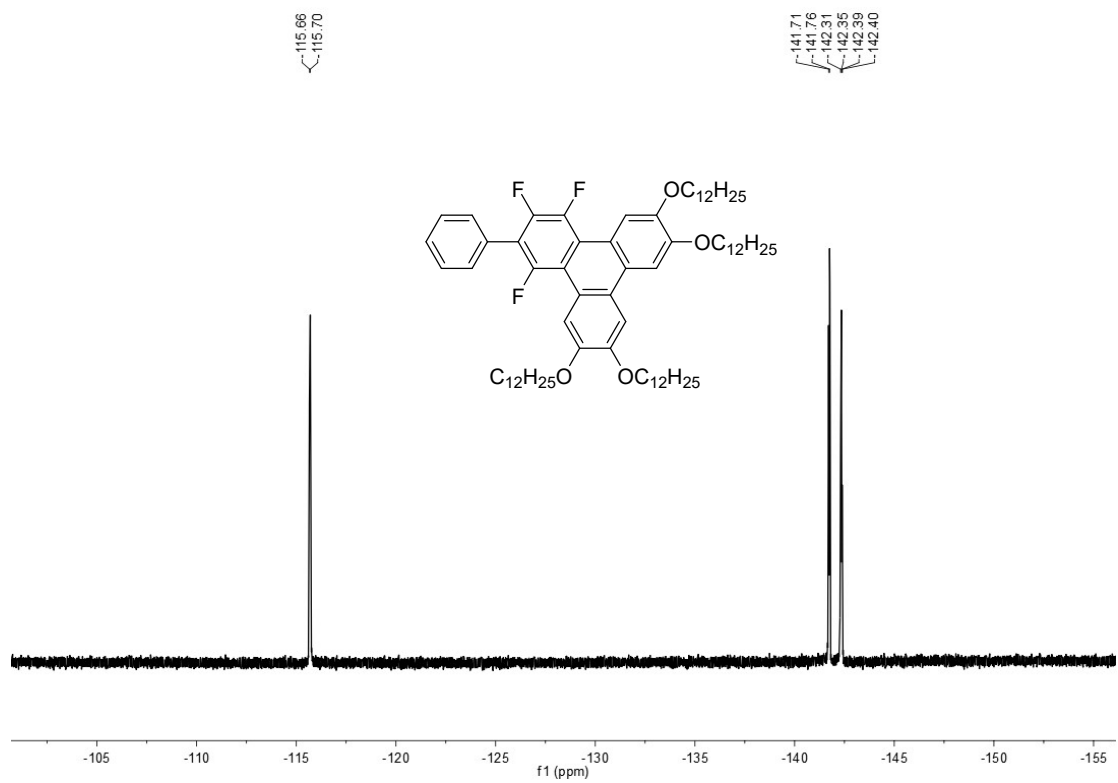

Figure S32 <sup>19</sup>F NMR (CDCl<sub>3</sub>, 376 MHz) spectrum of PH12.

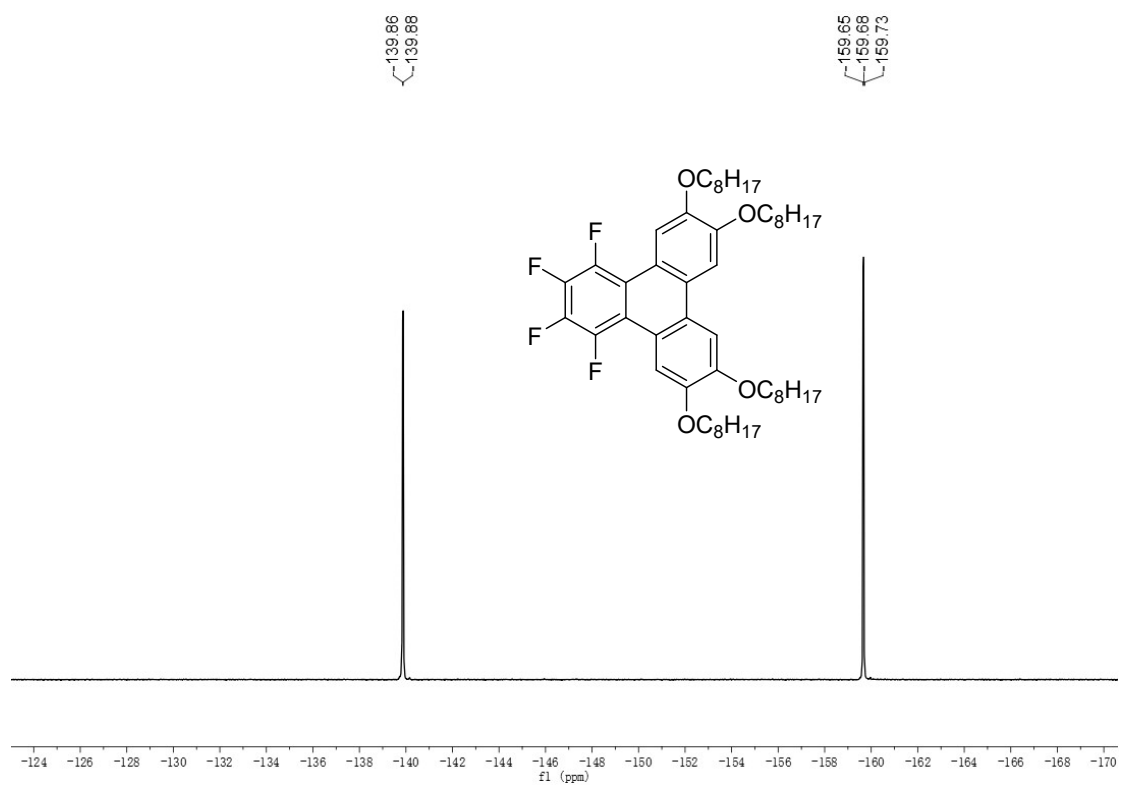

Figure S33 <sup>19</sup>F NMR (CDCl<sub>3</sub>, 565 MHz) spectrum of 4F-TP8.



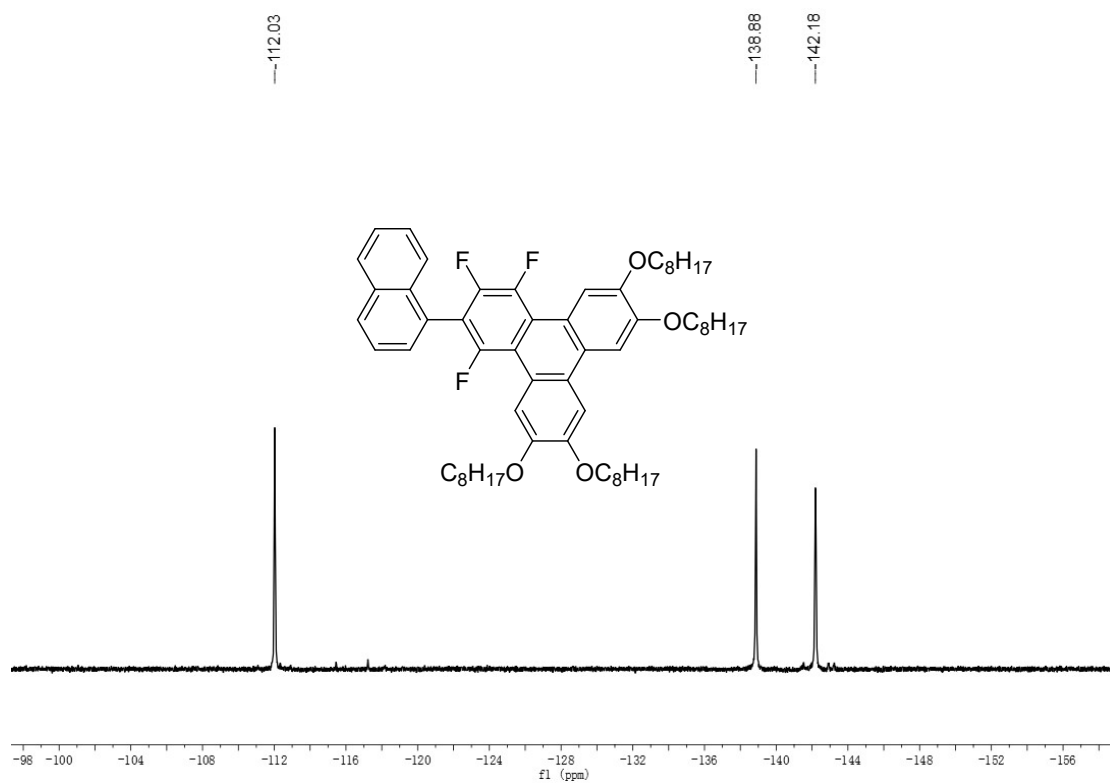

**Figure S34**  $^{19}\text{F}$  NMR (CDCl<sub>3</sub>, 565 MHz) spectrum of NAA8.

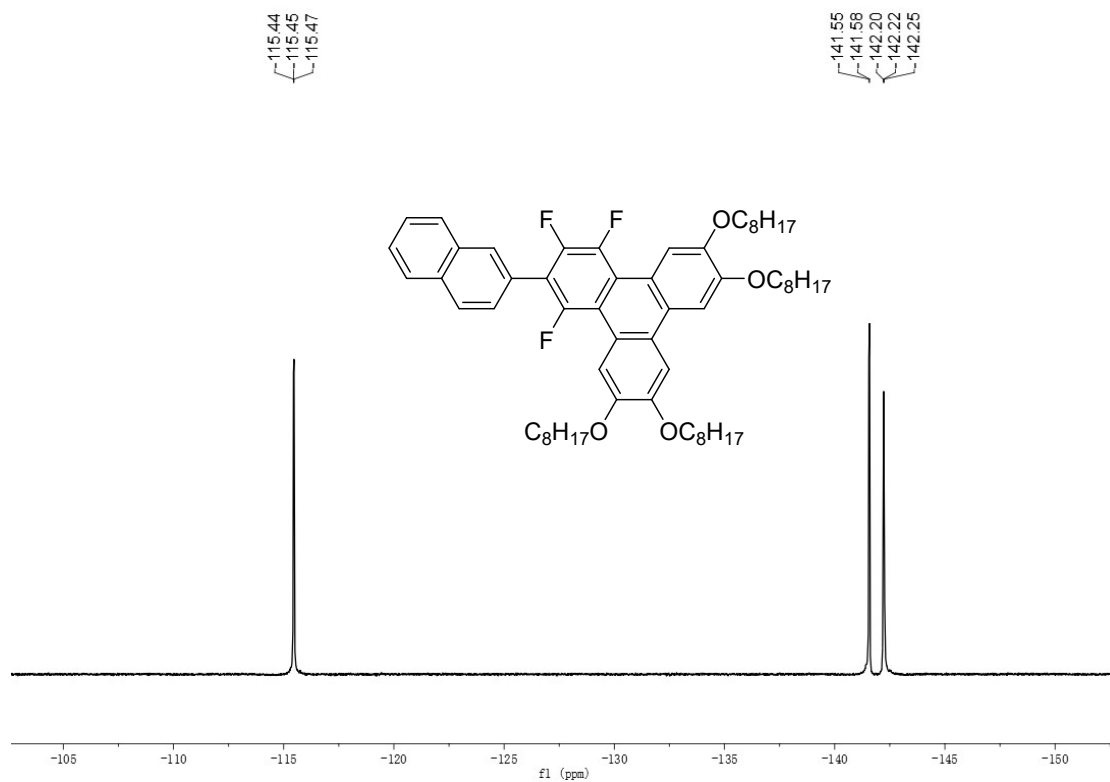

**Figure S35**  $^{19}\text{F}$  NMR (CDCl<sub>3</sub>, 565 MHz) spectrum of NAB8.

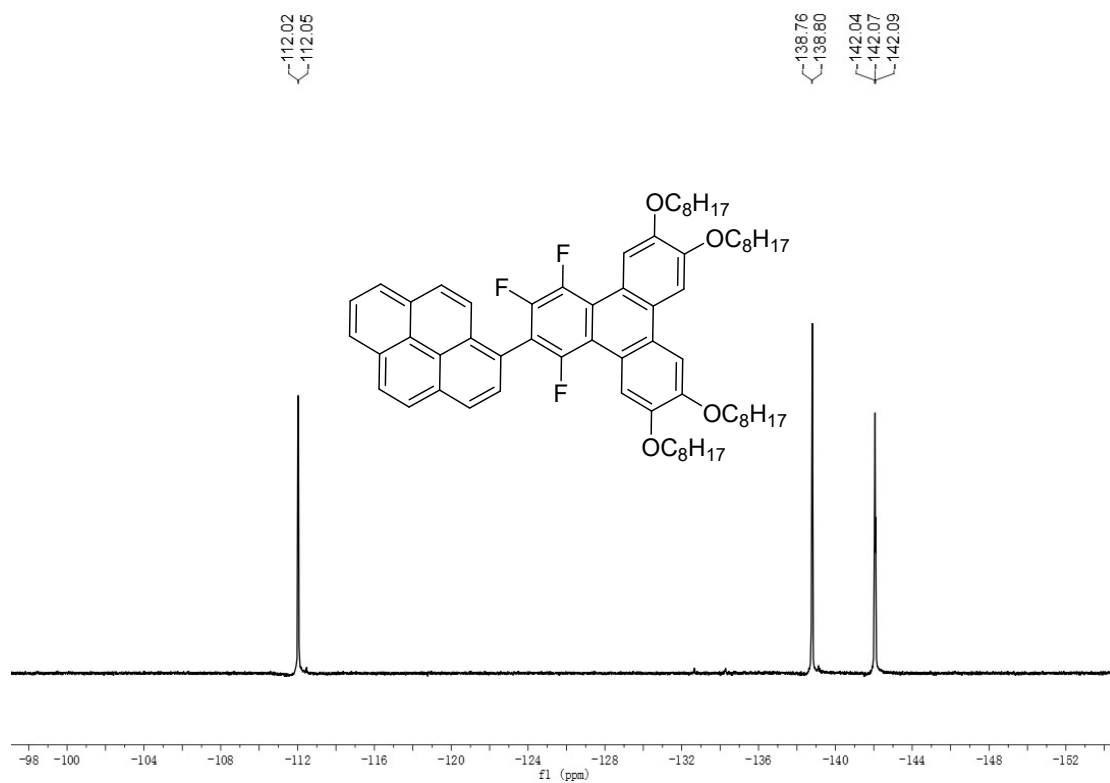

Figure S36  $^{19}\text{F}$  NMR (CDCl<sub>3</sub>, 565 MHz) spectrum of PY8.

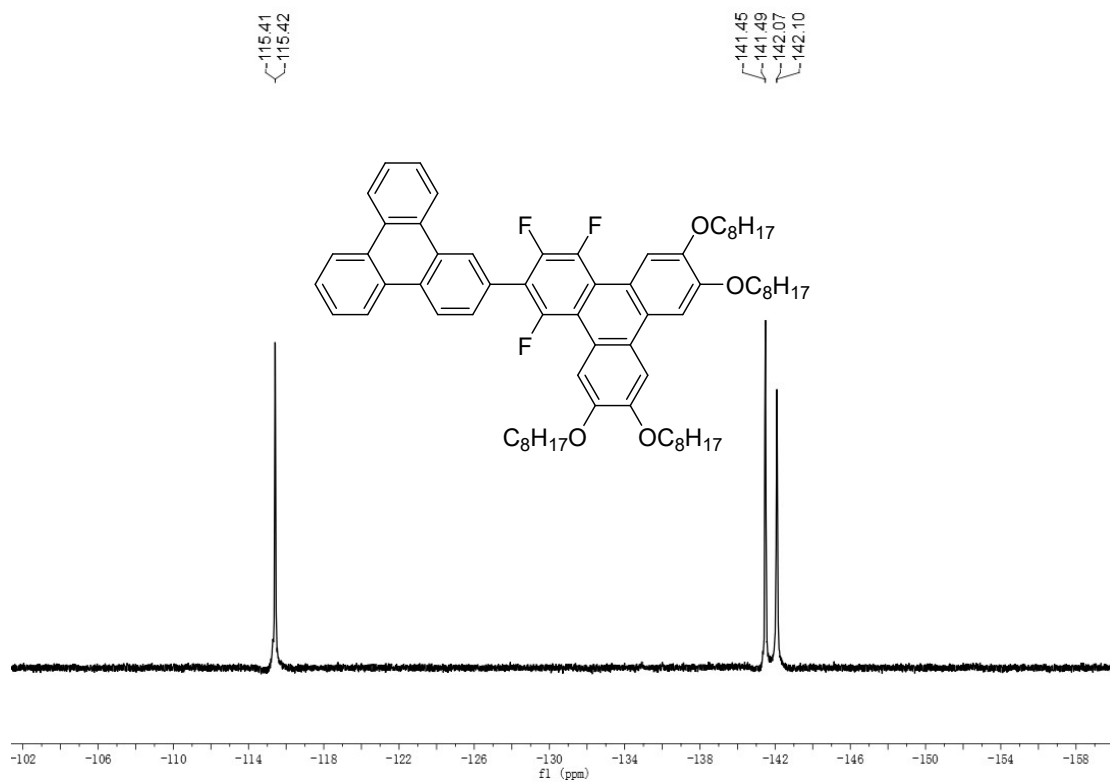

Figure S37  $^{19}\text{F}$  NMR (CDCl<sub>3</sub>, 565 MHz) spectrum of TP8.

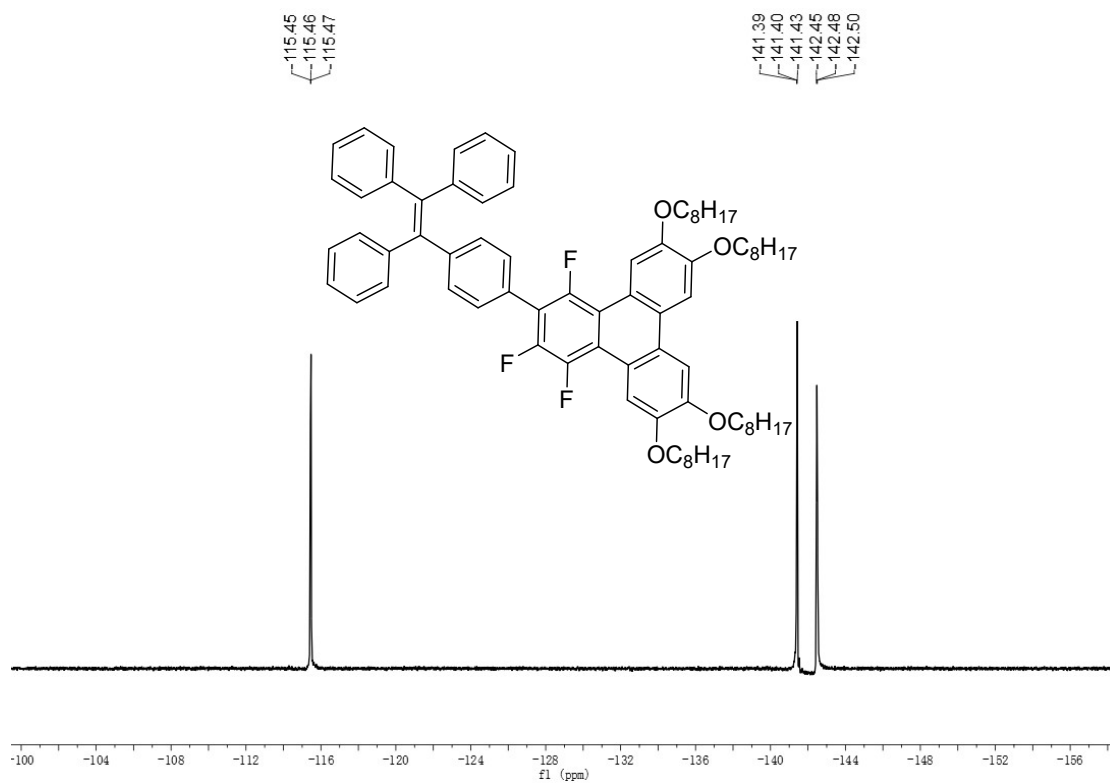

**Figure S38**  $^{19}\text{F}$  NMR (CDCl<sub>3</sub>, 565 MHz) spectrum of TPE8.

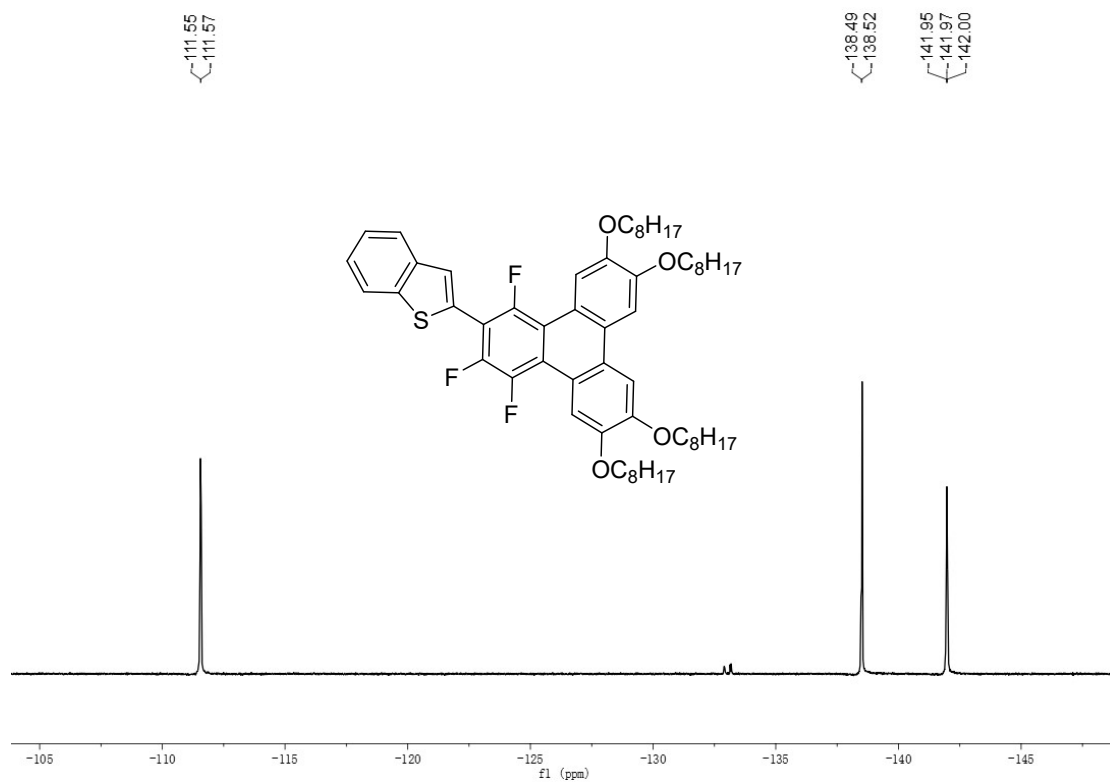

**Figure S39**  $^{19}\text{F}$  NMR (CDCl<sub>3</sub>, 565 MHz) spectrum of BT8.

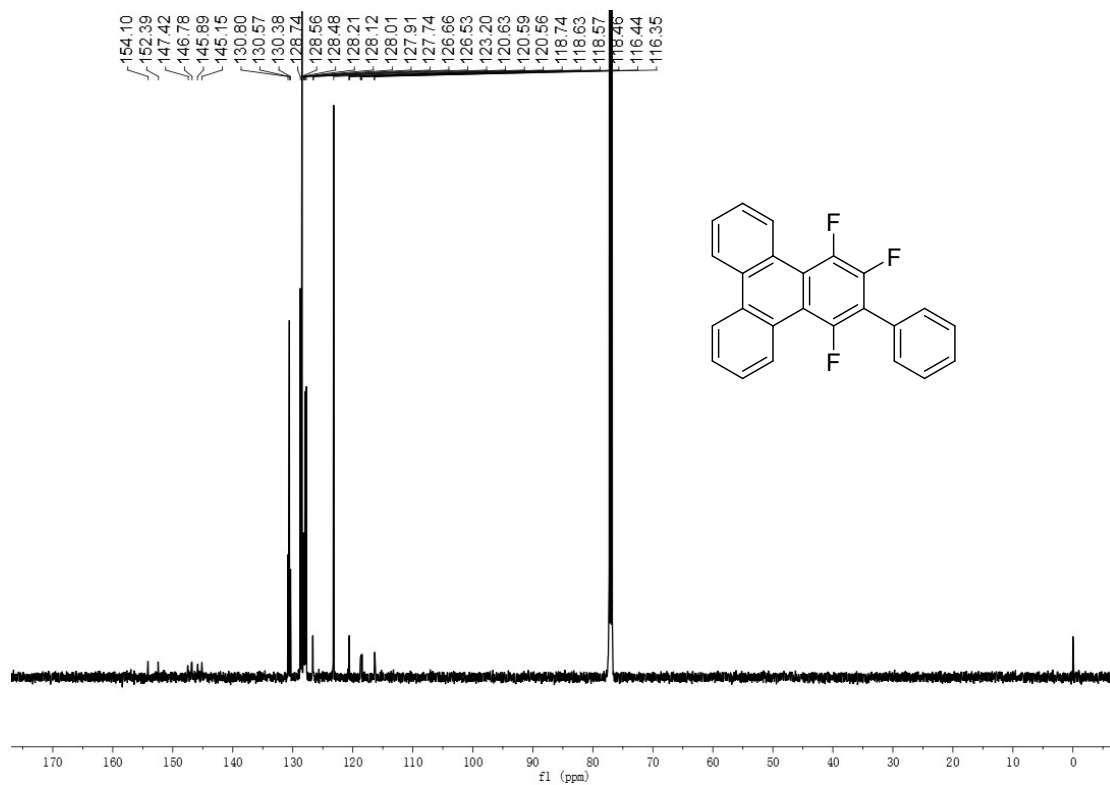

Figure S40  $^{13}\text{C}$  NMR (CDCl<sub>3</sub>, 151 MHz) spectrum of PH0.

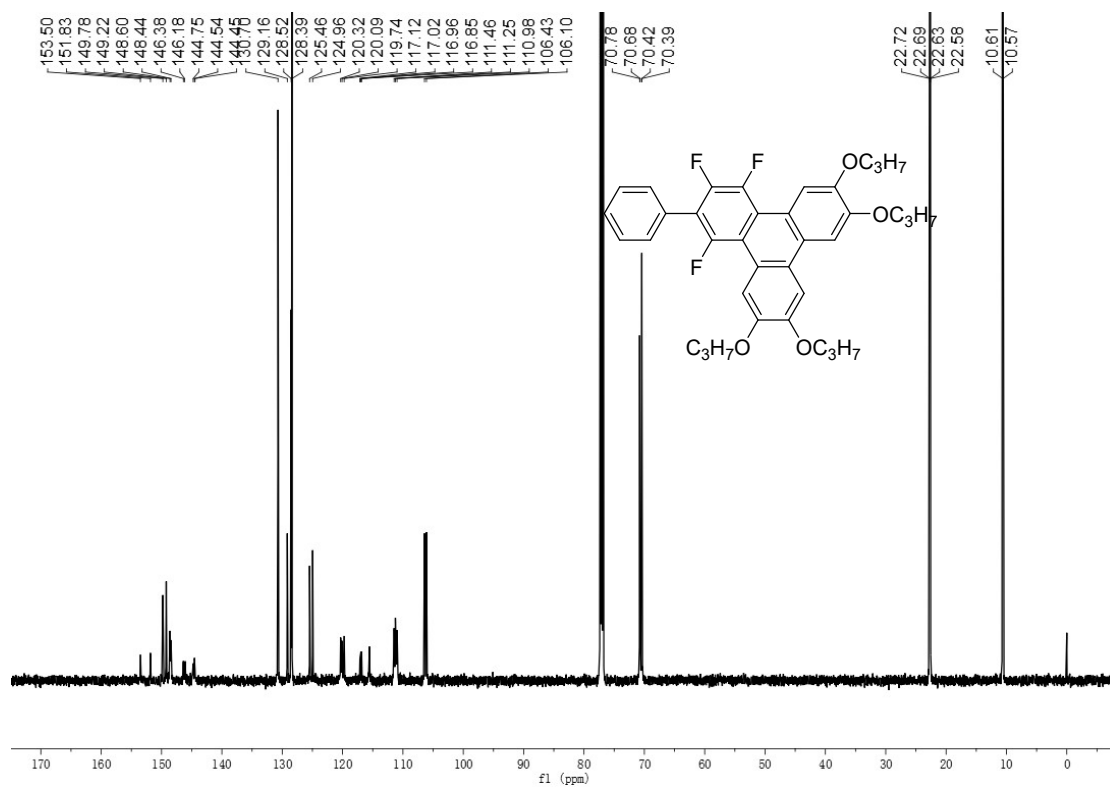

Figure S41  $^{13}\text{C}$  NMR (CDCl<sub>3</sub>, 151 MHz) spectrum of PH3.

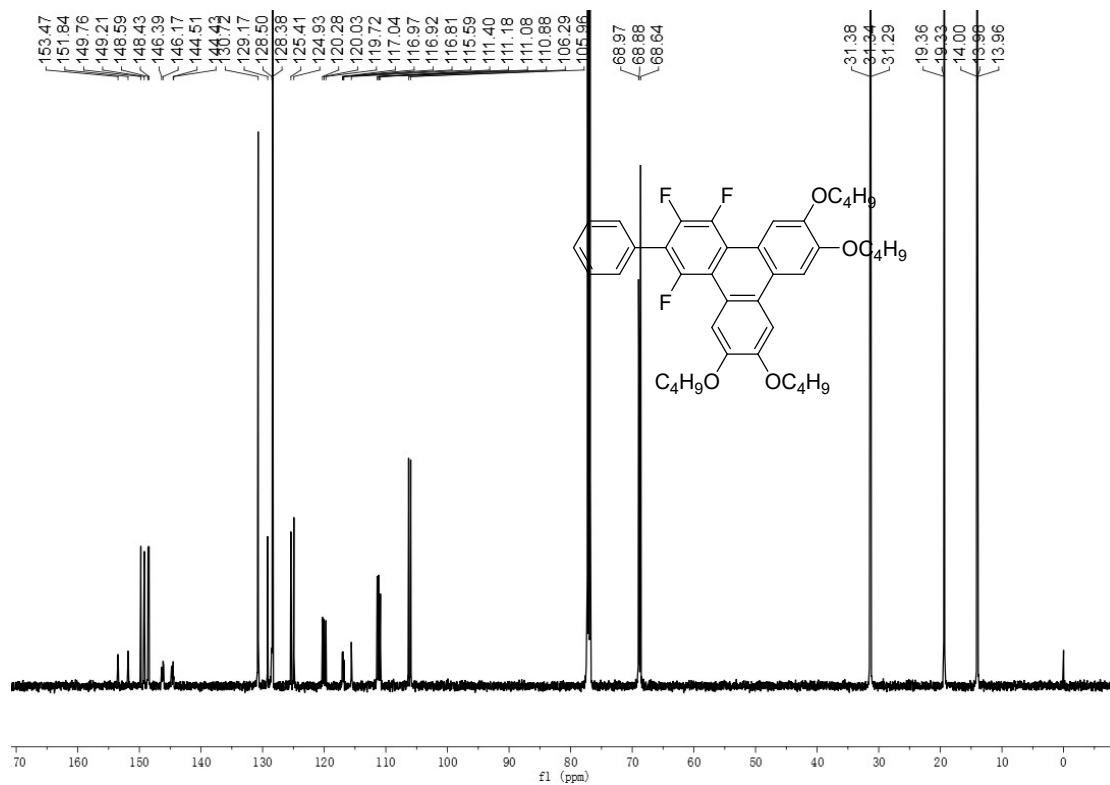

Figure S42  $^{13}\text{C}$  NMR ( $\text{CDCl}_3$ , 151 MHz) spectrum of PH4.

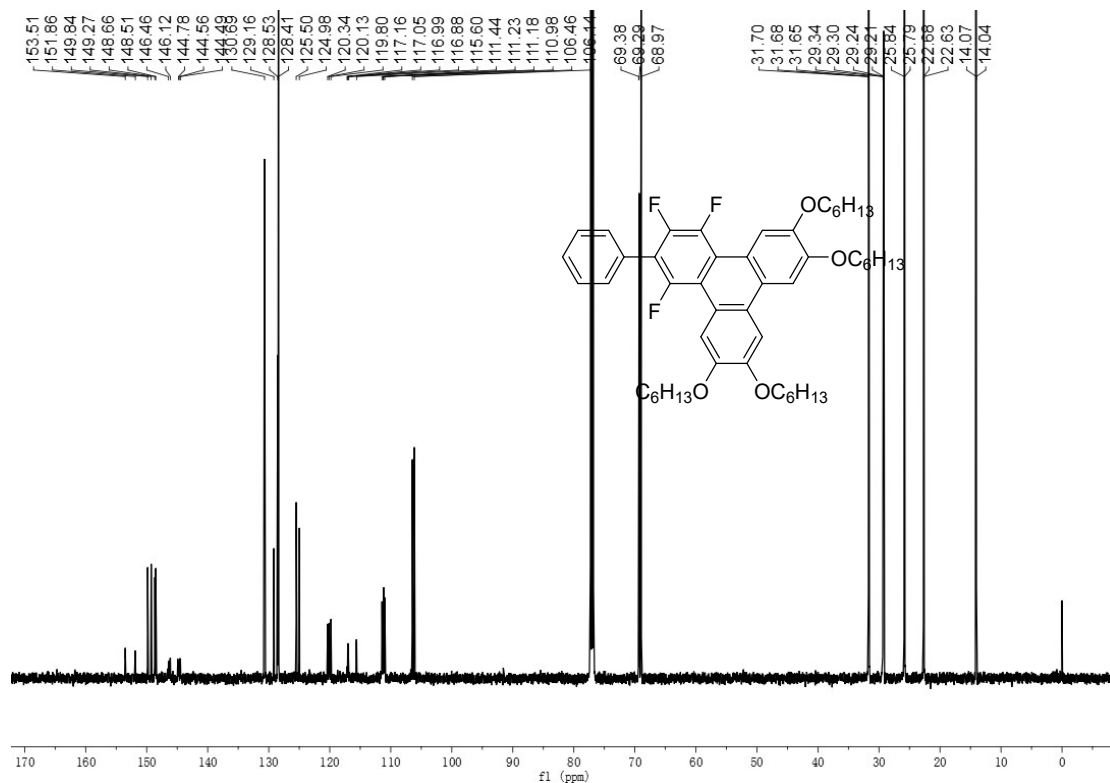

Figure S43  $^{13}\text{C}$  NMR ( $\text{CDCl}_3$ , 151 MHz) spectrum of PH6.

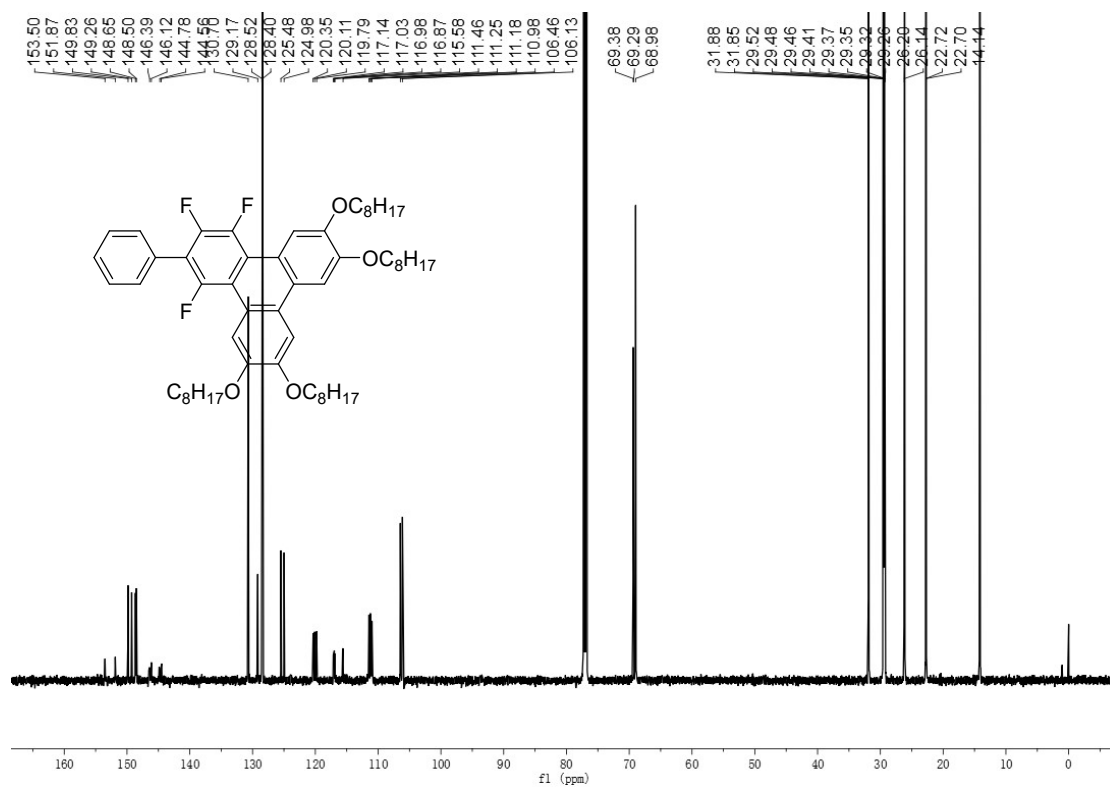

Figure S44 <sup>13</sup>C NMR (CDCl<sub>3</sub>, 151 MHz) spectrum of PH8.

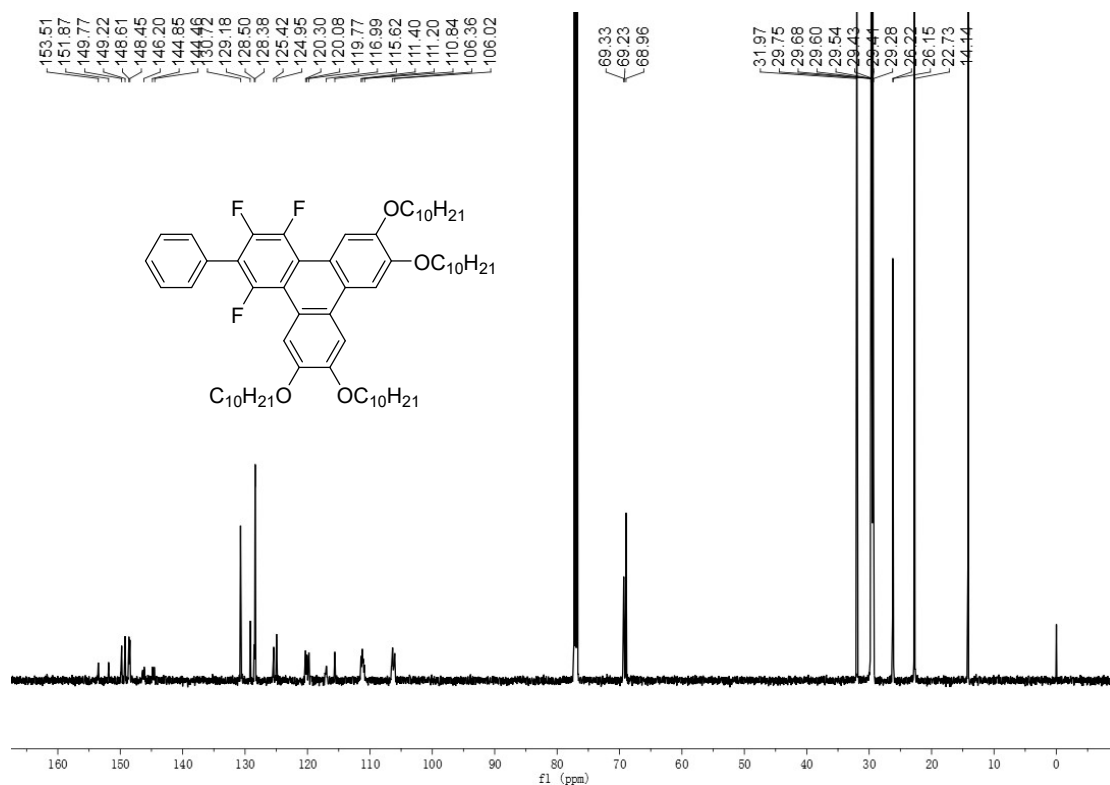

Figure S45 <sup>13</sup>C NMR (CDCl<sub>3</sub>, 151 MHz) spectrum of PH10.

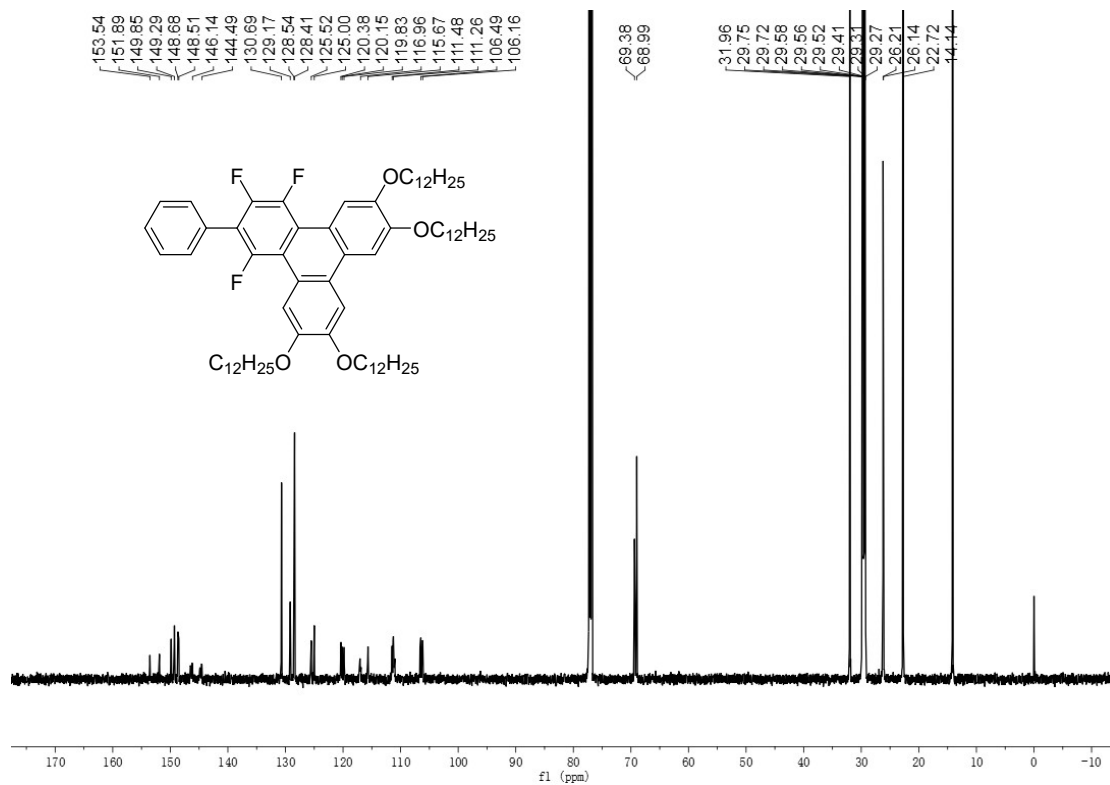

Figure S46 <sup>13</sup>C NMR (CDCl<sub>3</sub>, 151 MHz) spectrum of PH12.

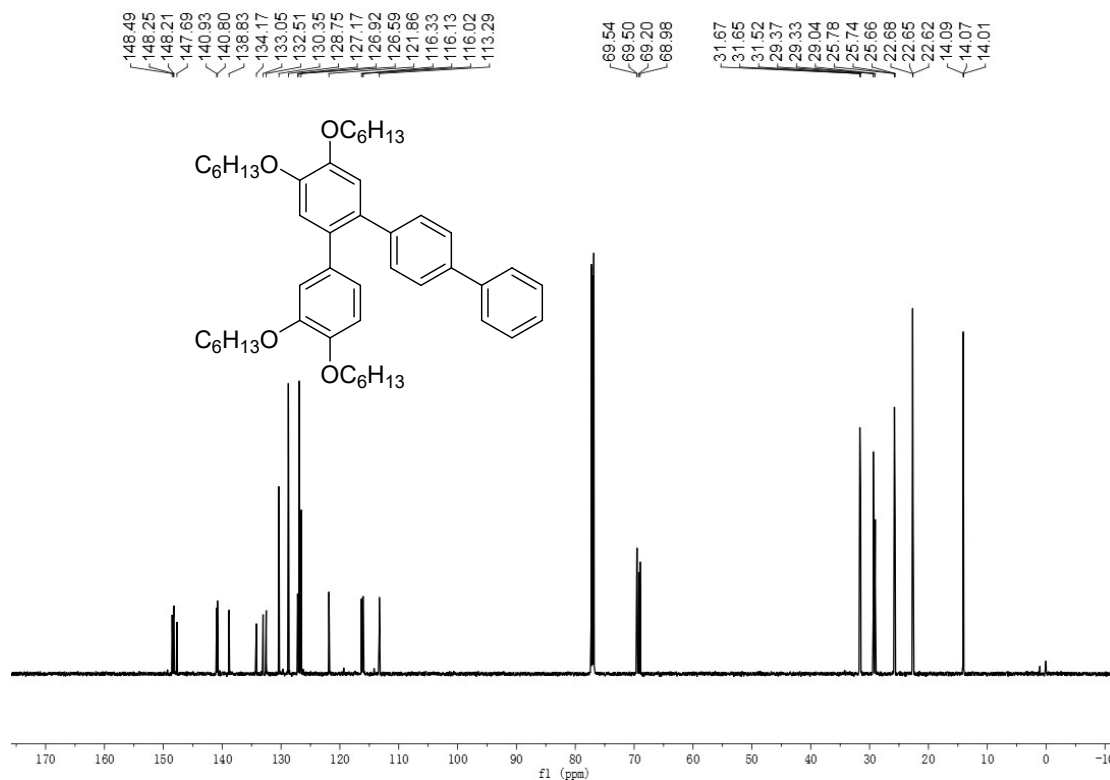

Figure S47 <sup>13</sup>C NMR (CDCl<sub>3</sub>, 151 MHz) spectrum of QP6.

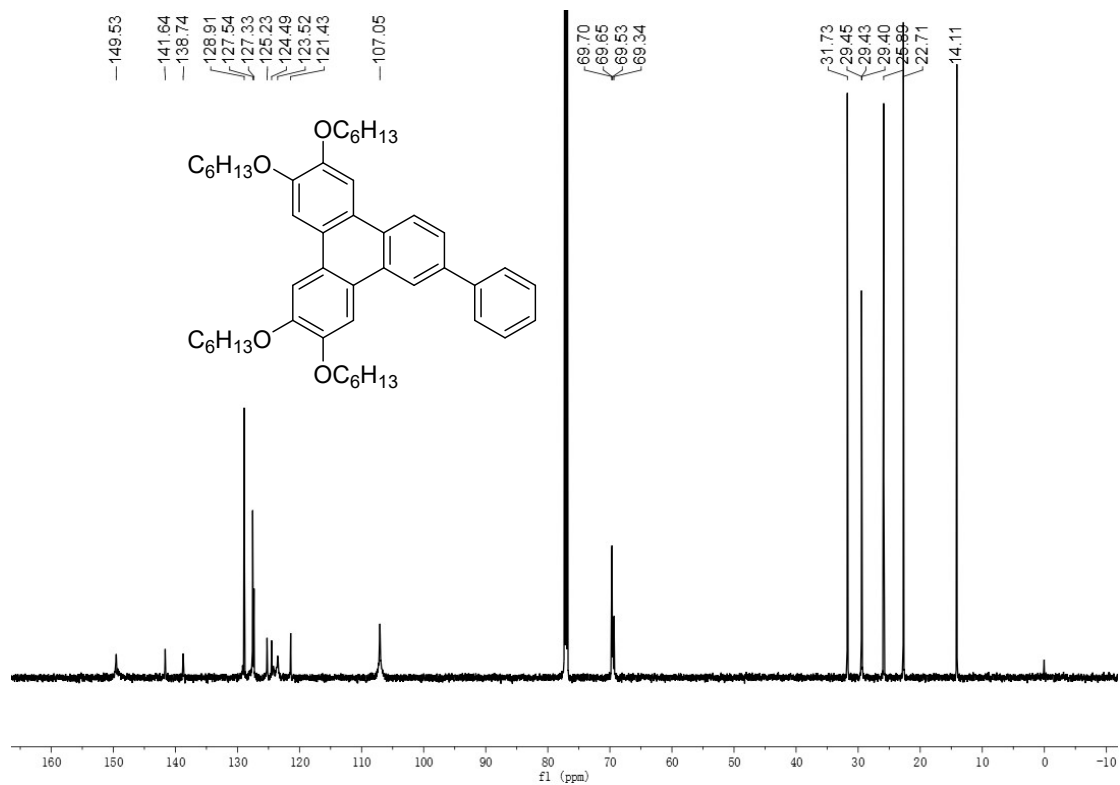

Figure S48 <sup>13</sup>C NMR (CDCl<sub>3</sub>, 151 MHz) spectrum of BTP6.

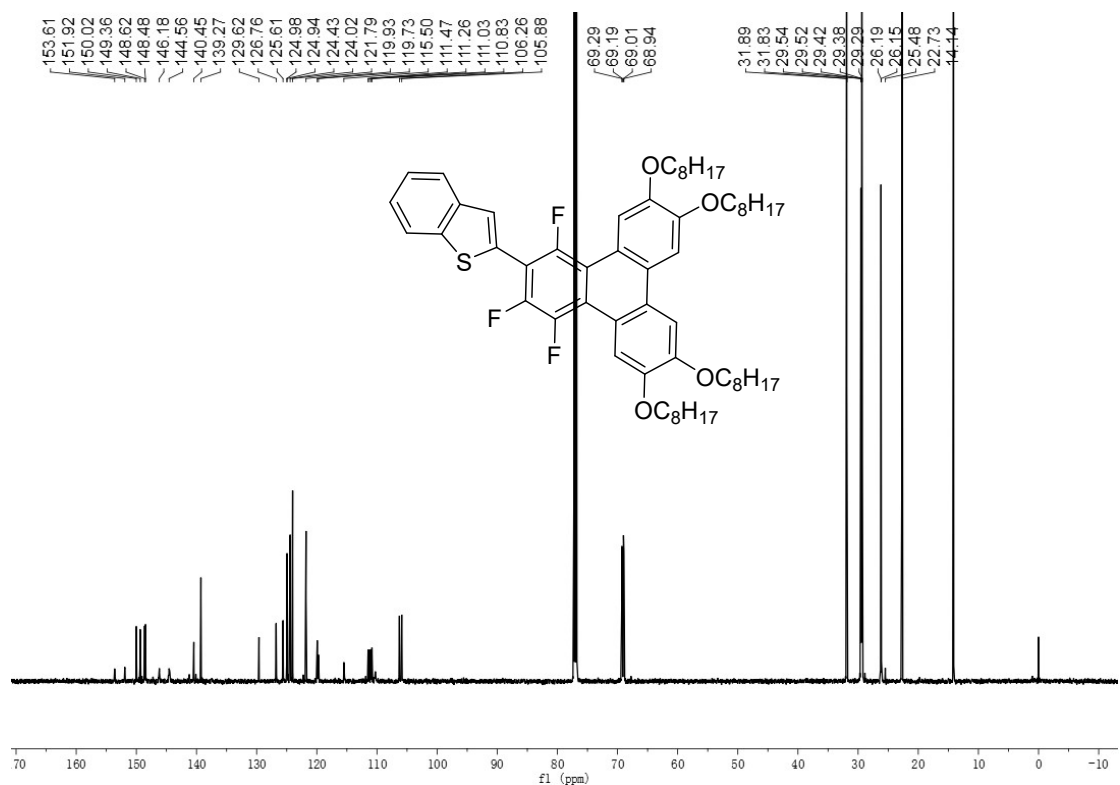

Figure S49 <sup>13</sup>C NMR (CDCl<sub>3</sub>, 151 MHz) spectrum of BT8.



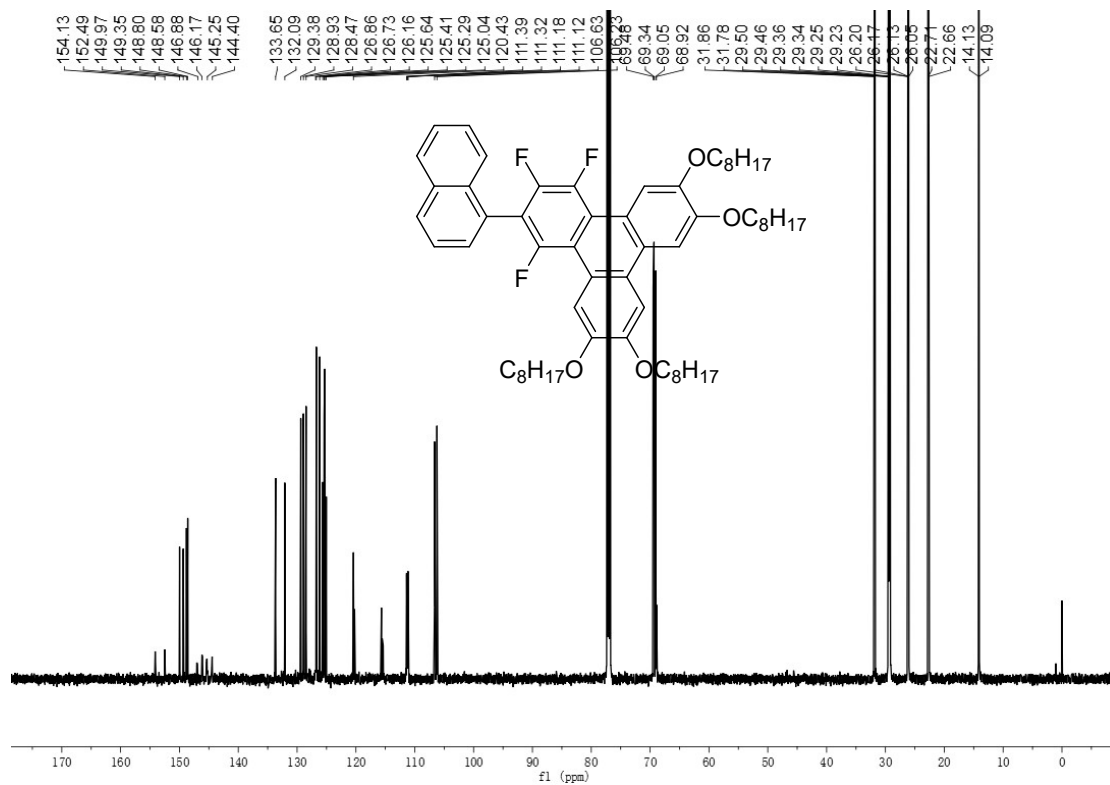

Figure S50  $^{13}\text{C}$  NMR ( $\text{CDCl}_3$ , 151 MHz) spectrum of NAA8.

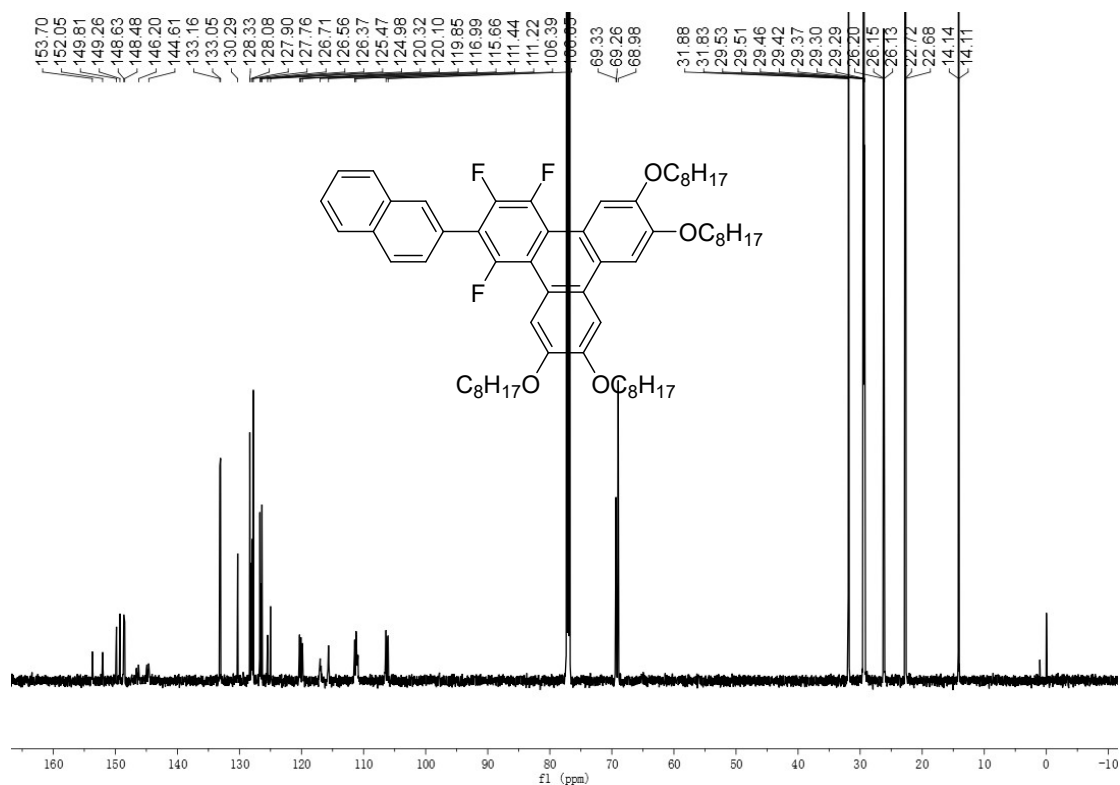

Figure S51  $^{13}\text{C}$  NMR ( $\text{CDCl}_3$ , 151 MHz) spectrum of NAB8.

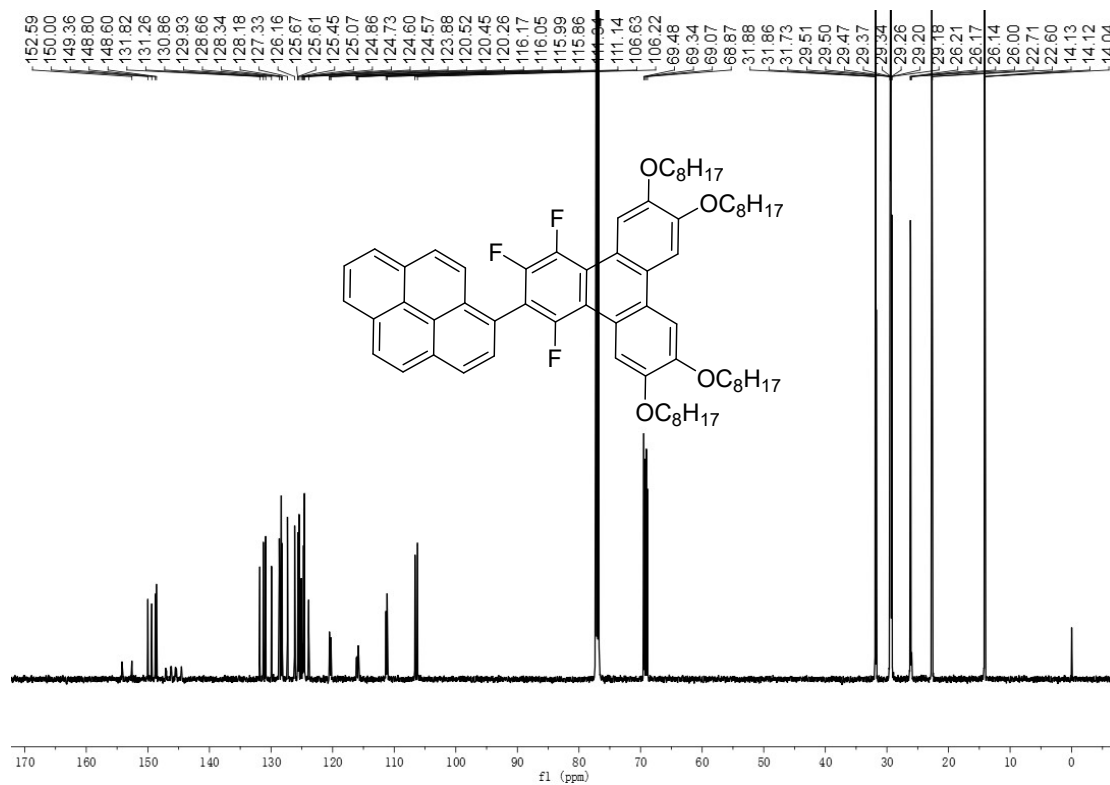

Figure S52 <sup>13</sup>C NMR (CDCl<sub>3</sub>, 151 MHz) spectrum of PY8.

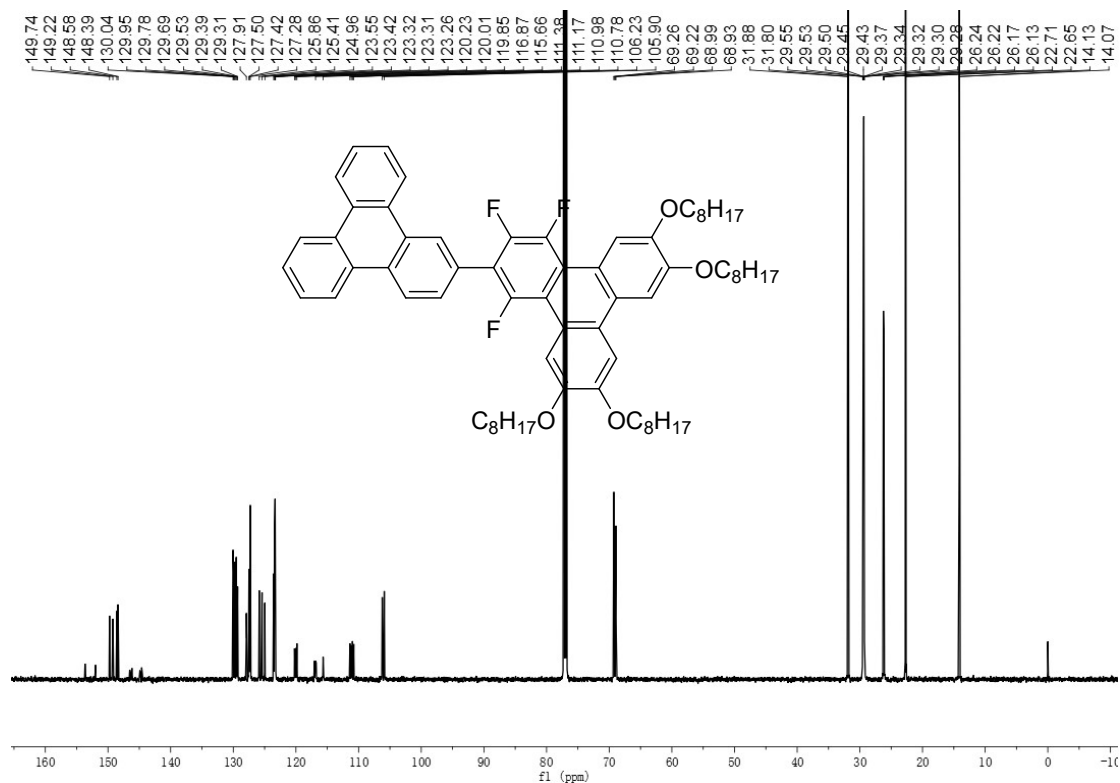

Figure S53 <sup>13</sup>C NMR (CDCl<sub>3</sub>, 151 MHz) spectrum of TP8.

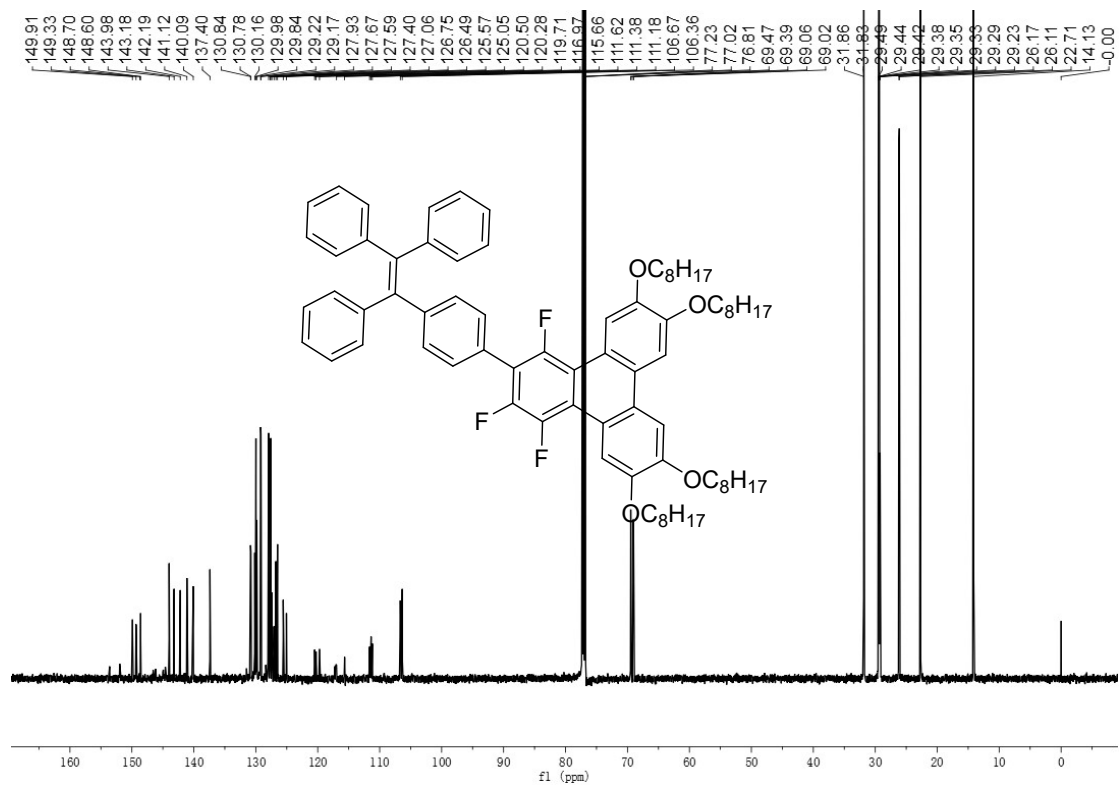

Figure S54  $^{13}\text{C}$  NMR ( $\text{CDCl}_3$ , 151 MHz) spectrum of TPE8.

#### 4. HRMS

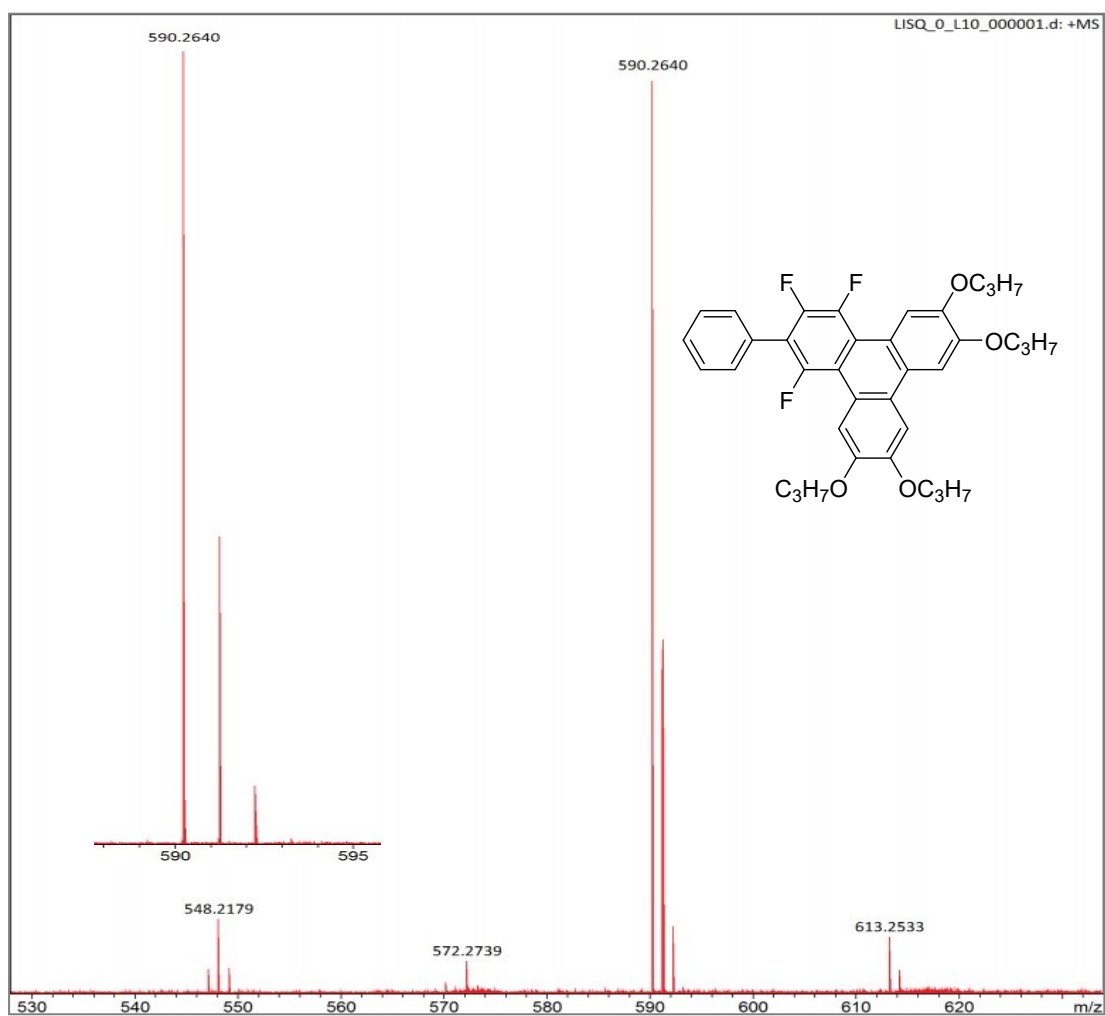

Figure S55 HRMS m/z (MALDI) spectrum of PH3.

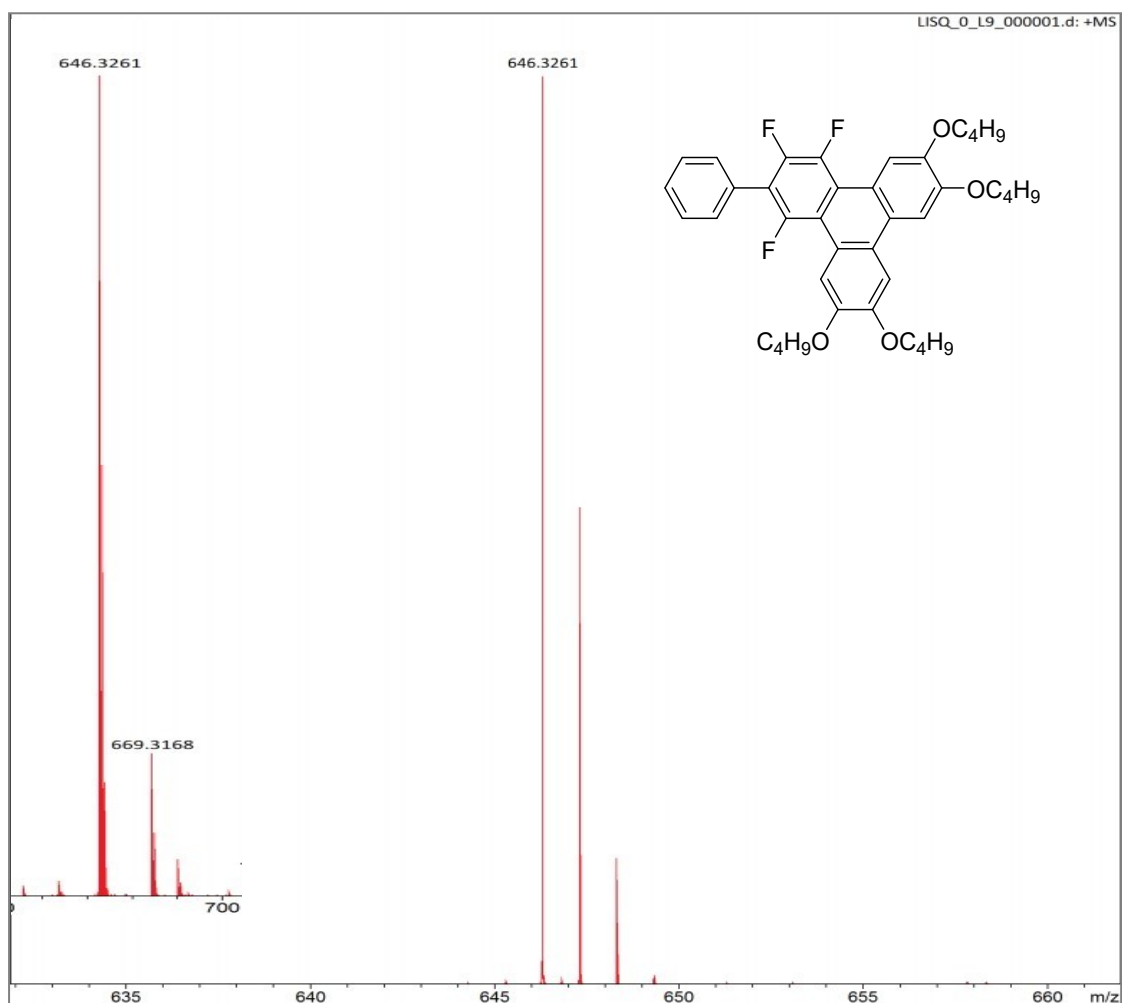

**Figure S56** HRMS m/z (MALDI) spectrum of **PH4**.

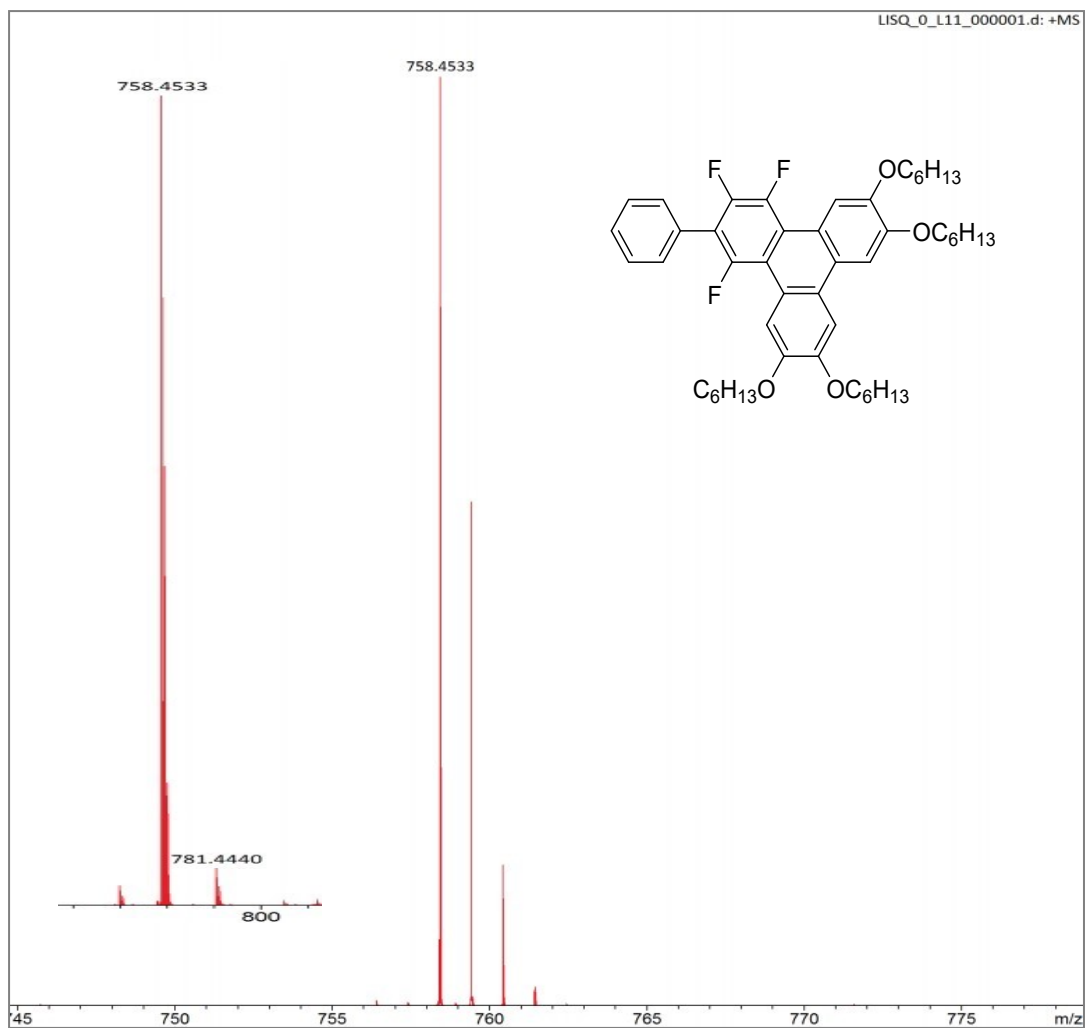

**Figure S57** HRMS  $m/z$  (MALDI) spectrum of **PH6**.

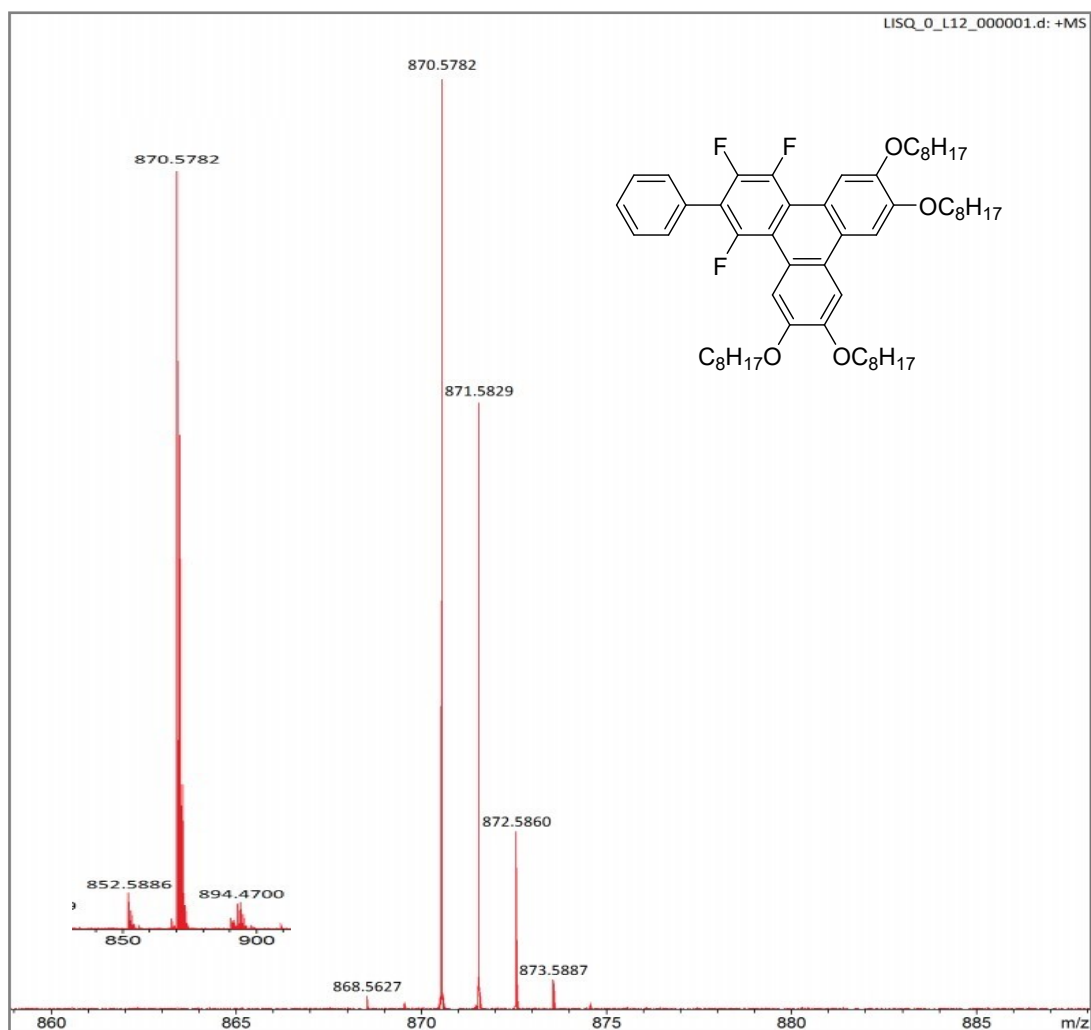

Figure S58 HRMS m/z (MALDI) spectrum of PH8.

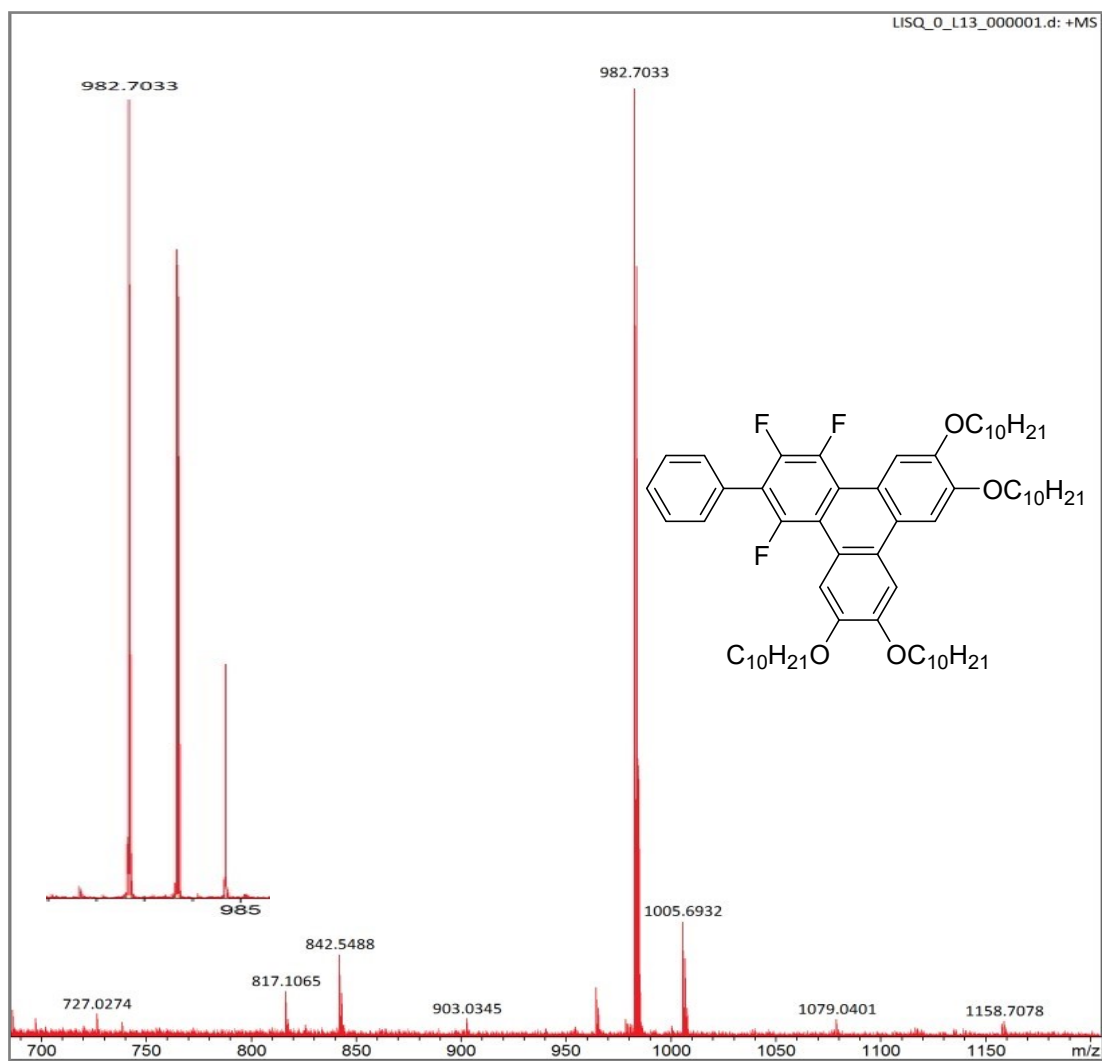

Figure S59 HRMS m/z (MALDI) spectrum of PH10.



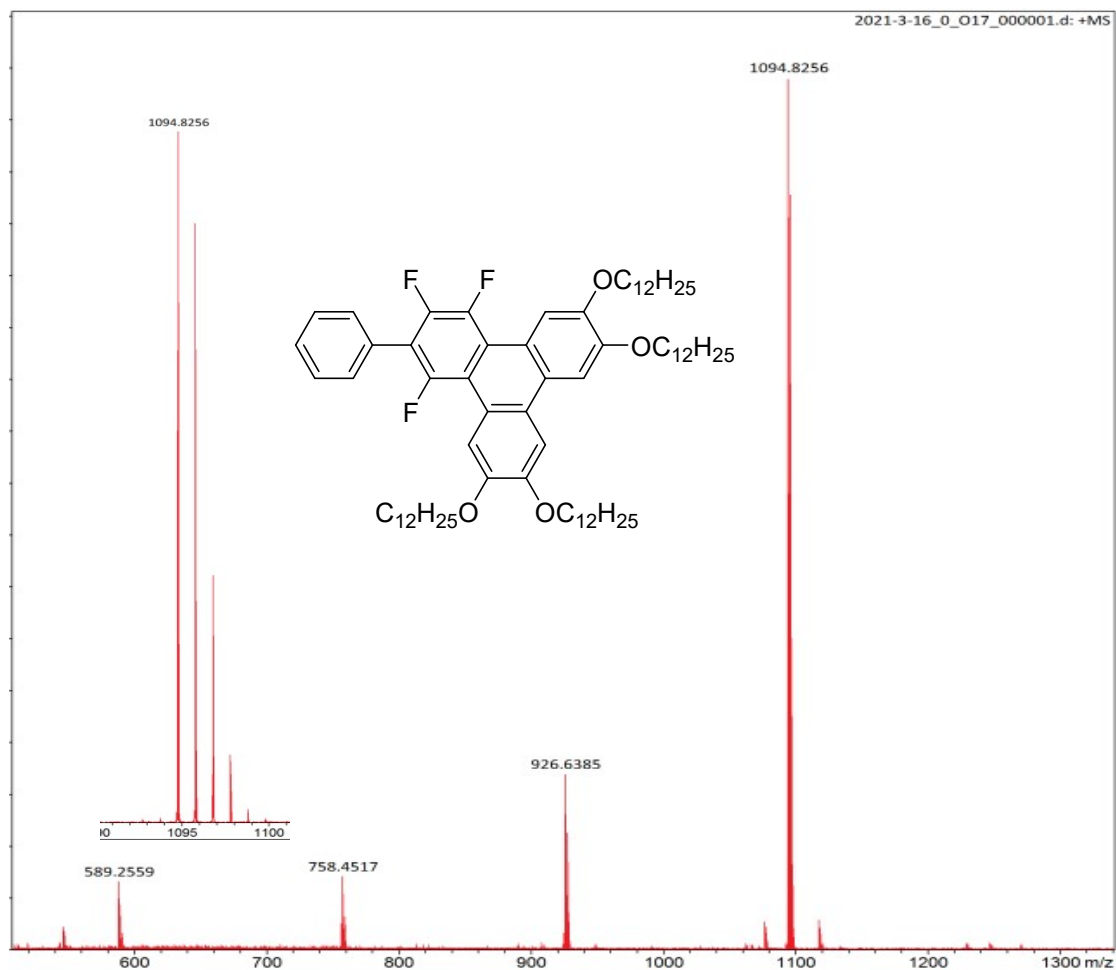

**Figure S60** HRMS m/z (MALDI) spectrum of **PH12**.

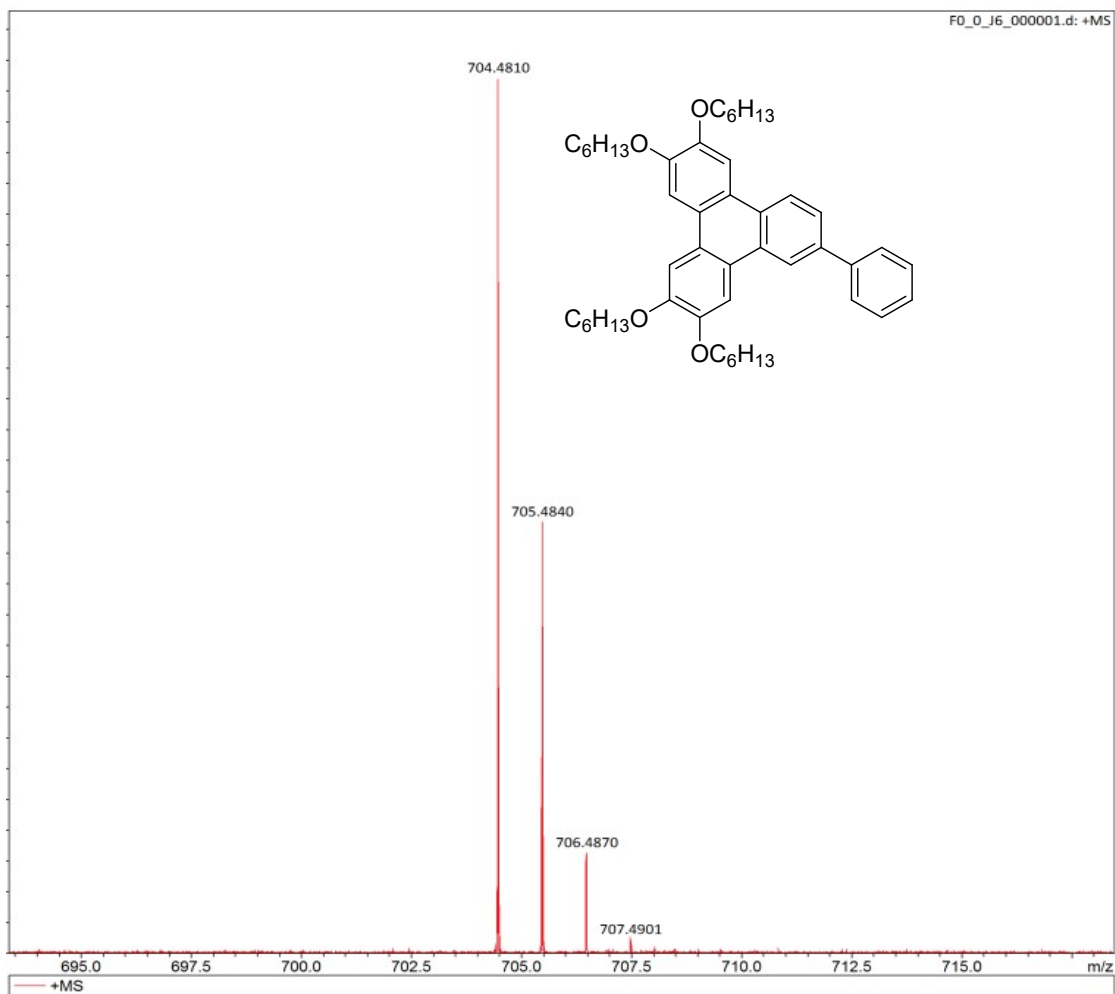

**Figure S61** HRMS m/z (MALDI) spectrum of **BTP6**.

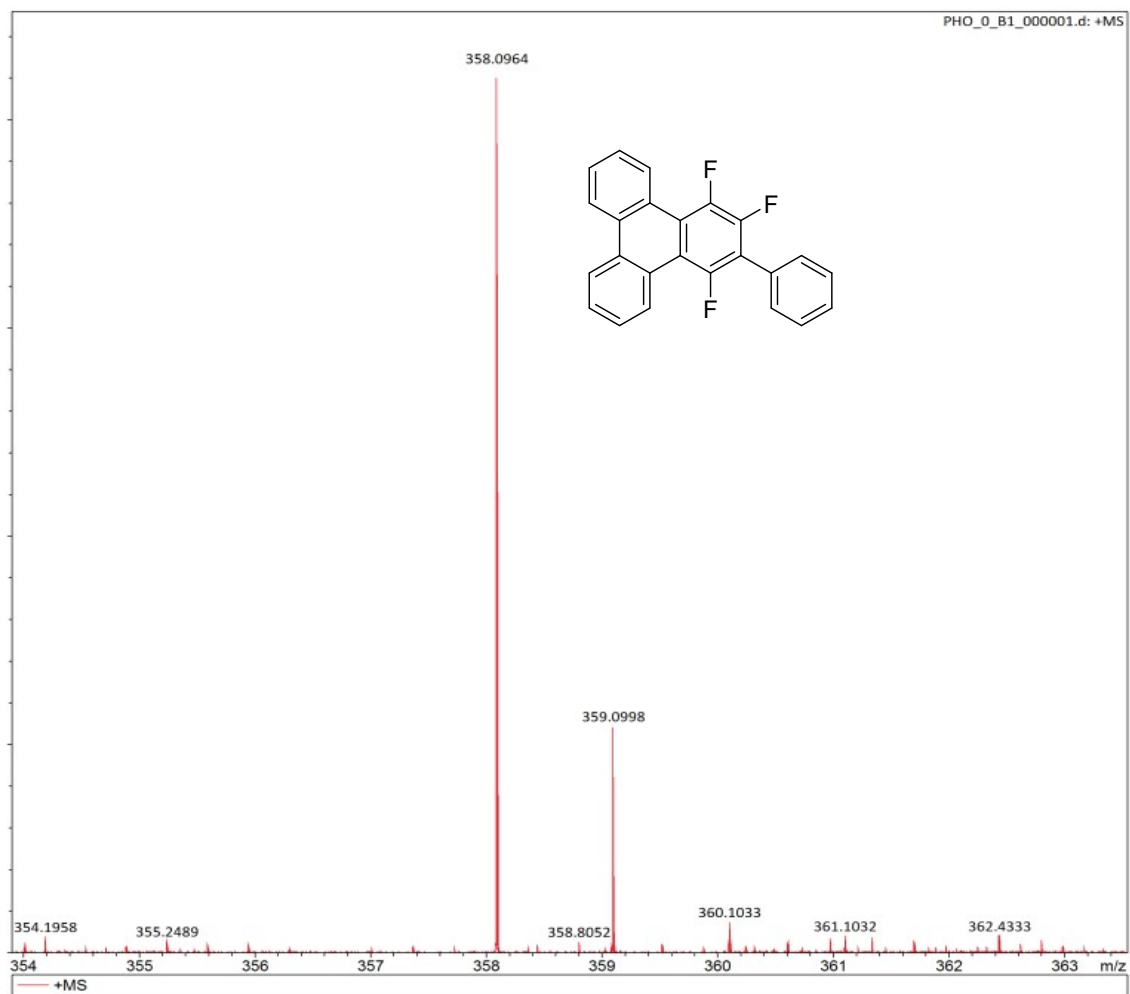

**Figure S62** HRMS m/z (MALDI) spectrum of **PHO**.

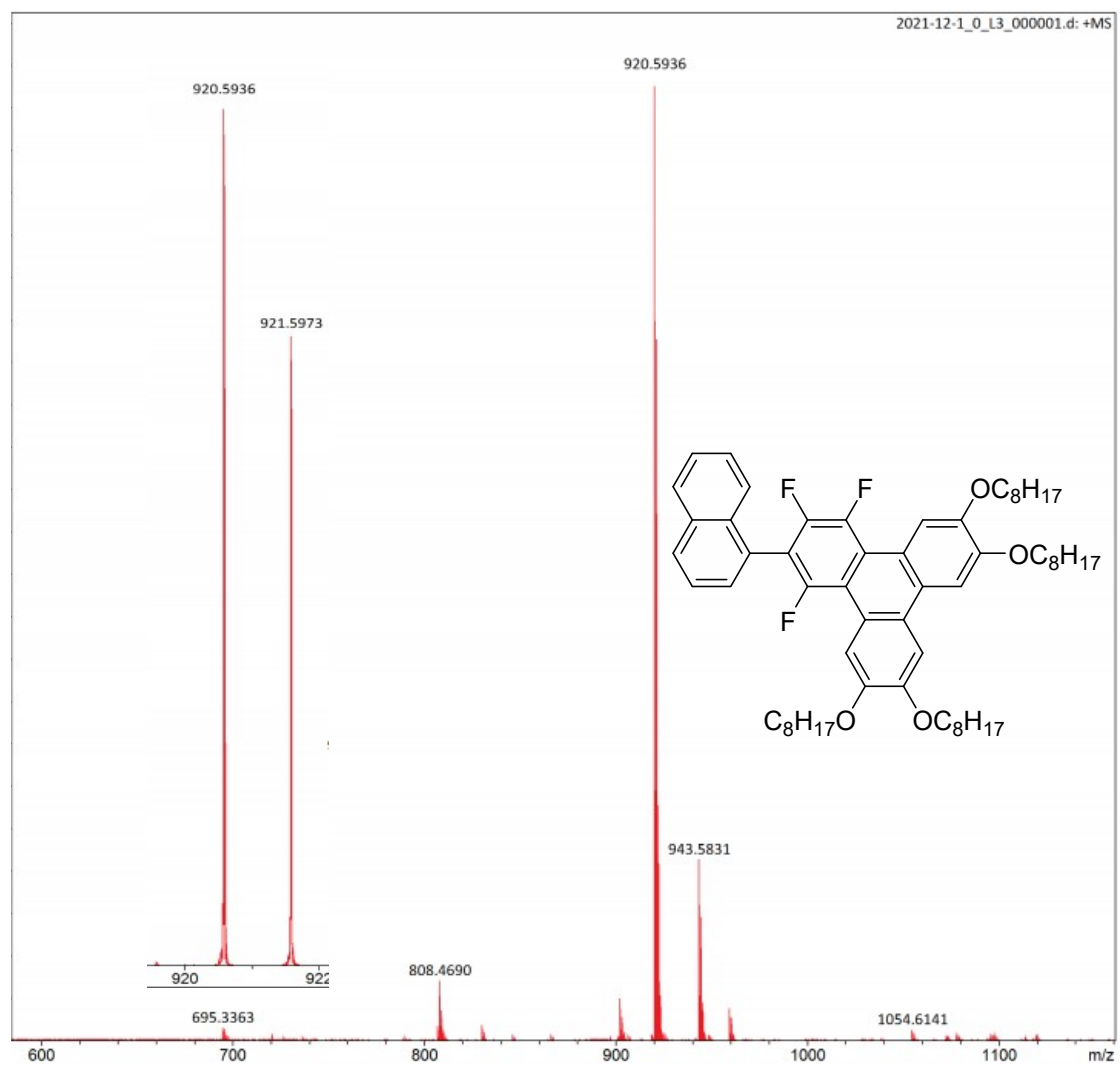

Figure S63 HRMS m/z (MALDI) spectrum of **NAA8**.

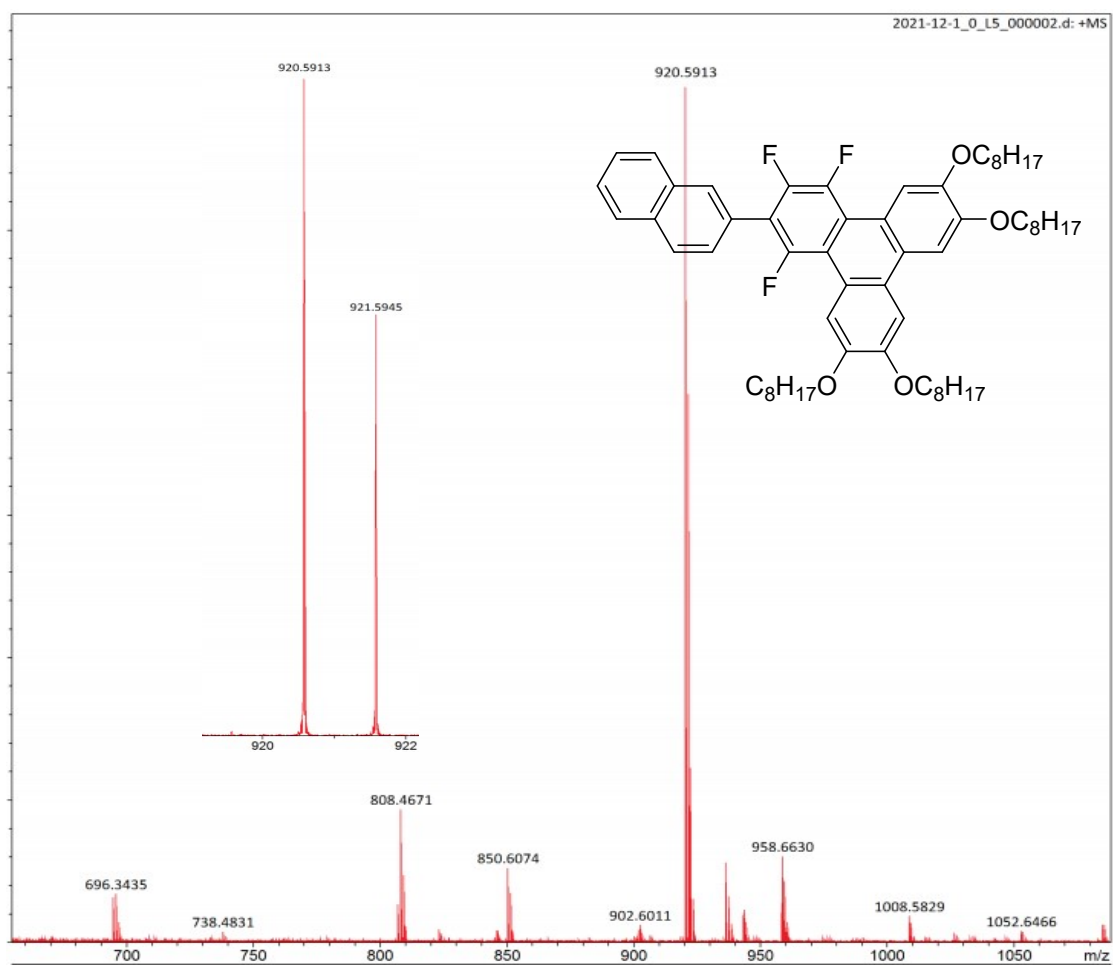

Figure S64 HRMS m/z (MALDI) spectrum of NAB8.

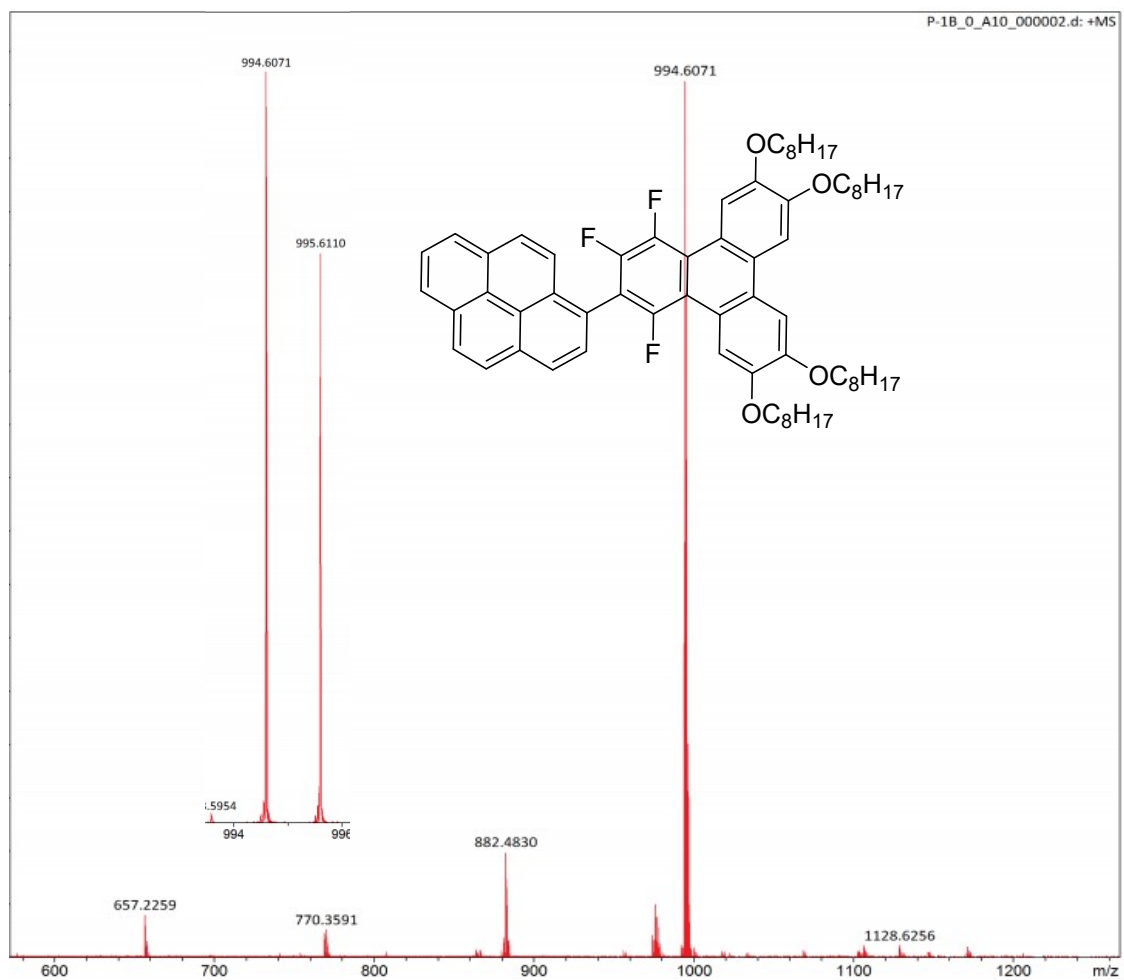

**Figure S65** HRMS m/z (MALDI) spectrum of PY8.

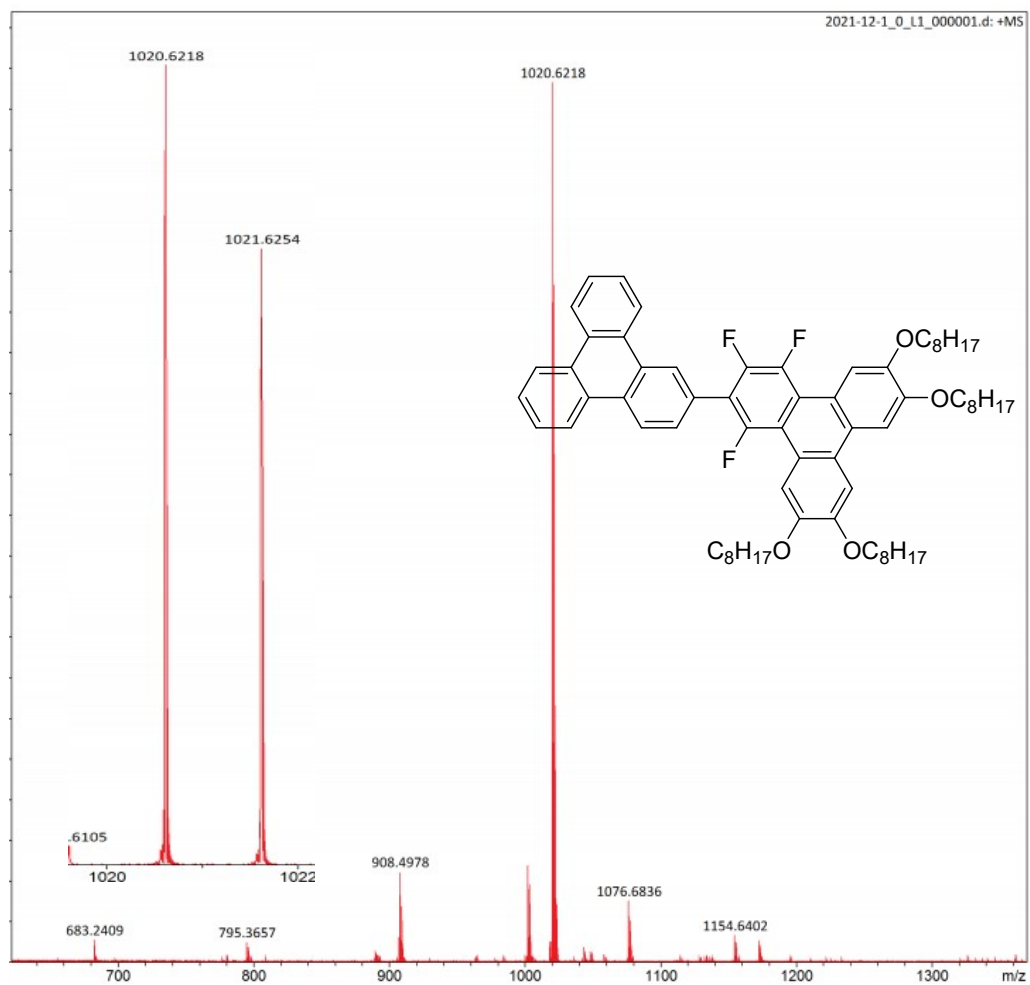

**Figure S66** HRMS m/z (MALDI) spectrum of TP8.

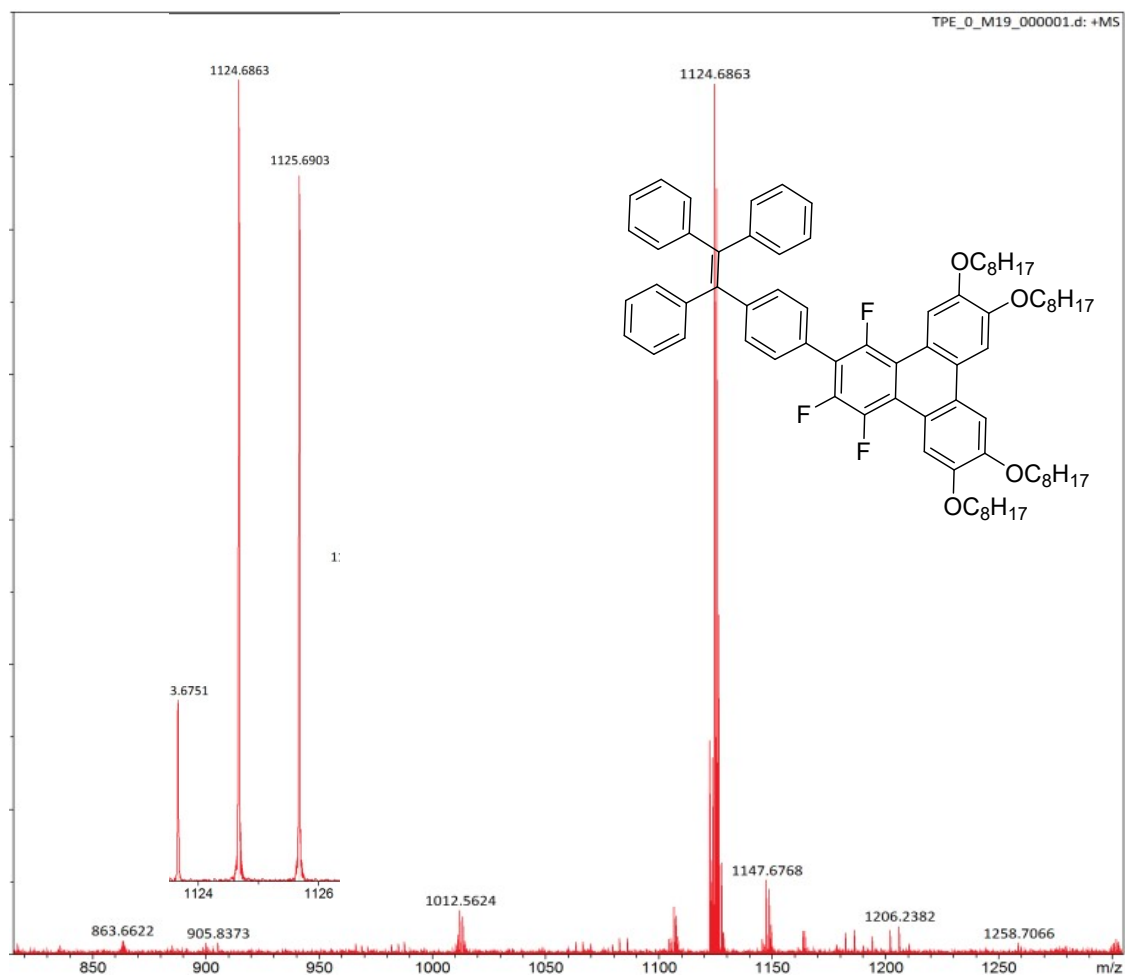

**Figure S67** HRMS m/z (MALDI) spectrum of TPE8.



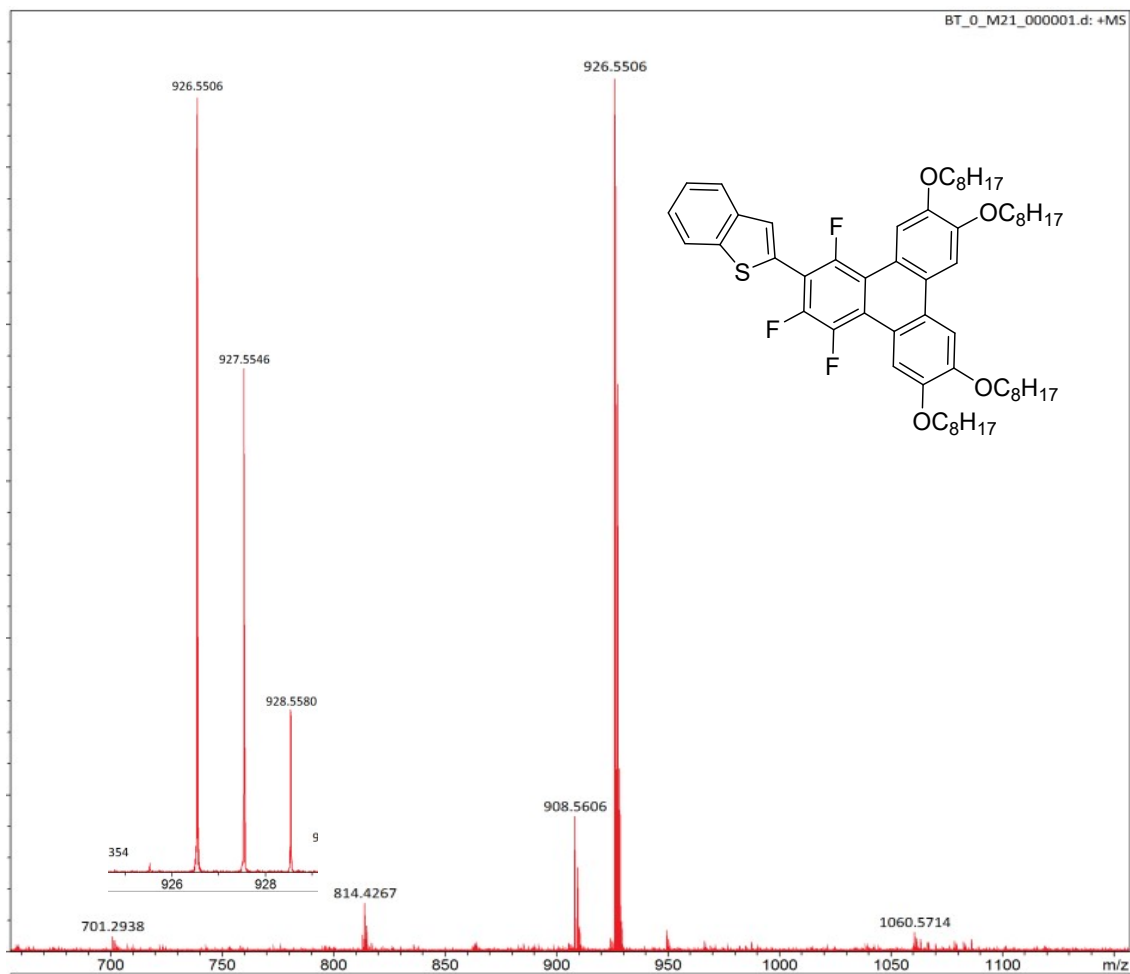

**Figure S68** HRMS m/z (MALDI) spectrum of **BT8**.

## 5. X-ray Crystallography

**Table S1.** Crystal structure and refinement parameters of the compound **PH0**.

| Compound                                    | PH0                                                           |
|---------------------------------------------|---------------------------------------------------------------|
| Empirical formula                           | C <sub>24</sub> H <sub>13</sub> F <sub>3</sub>                |
| Formula weight                              | 358.34                                                        |
| Temperature/K                               | 298.1(4)                                                      |
| Crystal system                              | monoclinic                                                    |
| Space group                                 | P2 <sub>1</sub> /n                                            |
| a/Å                                         | 13.2645(2)                                                    |
| b/Å                                         | 5.52840(10)                                                   |
| c/Å                                         | 22.7571(3)                                                    |
| α/°                                         | 90                                                            |
| β/°                                         | 102.6510(10)                                                  |
| γ/°                                         | 90                                                            |
| Volume/Å <sup>3</sup>                       | 1628.30(4)                                                    |
| Z                                           | 4                                                             |
| ρ <sub>calc</sub> /cm <sup>3</sup>          | 1.462                                                         |
| μ/mm <sup>-1</sup>                          | 0.899                                                         |
| F(000)                                      | 736.0                                                         |
| Crystal size/mm <sup>3</sup>                | 0.15 × 0.14 × 0.12                                            |
| Radiation                                   | CuKα (λ = 1.54184)                                            |
| 2θ range for data collection/°              | 7.112 to 152.552                                              |
| Index ranges                                | -16 ≤ h ≤ 16, -5 ≤ k ≤ 6, -27 ≤ l ≤ 28                        |
| Reflections collected                       | 15594                                                         |
| Independent reflections                     | 3314 [R <sub>int</sub> = 0.0383, R <sub>sigma</sub> = 0.0259] |
| Data/restraints/parameters                  | 3314/0/244                                                    |
| Goodness-of-fit on F <sup>2</sup>           | 1.035                                                         |
| Final R indexes [I ≥ 2σ (I)]                | R <sub>1</sub> = 0.0439, wR <sub>2</sub> = 0.1189             |
| Final R indexes [all data]                  | R <sub>1</sub> = 0.0535, wR <sub>2</sub> = 0.1265             |
| Largest diff. peak/hole / e Å <sup>-3</sup> | 0.17/-0.21                                                    |
| CCDC Deposition Number                      | 2283240                                                       |

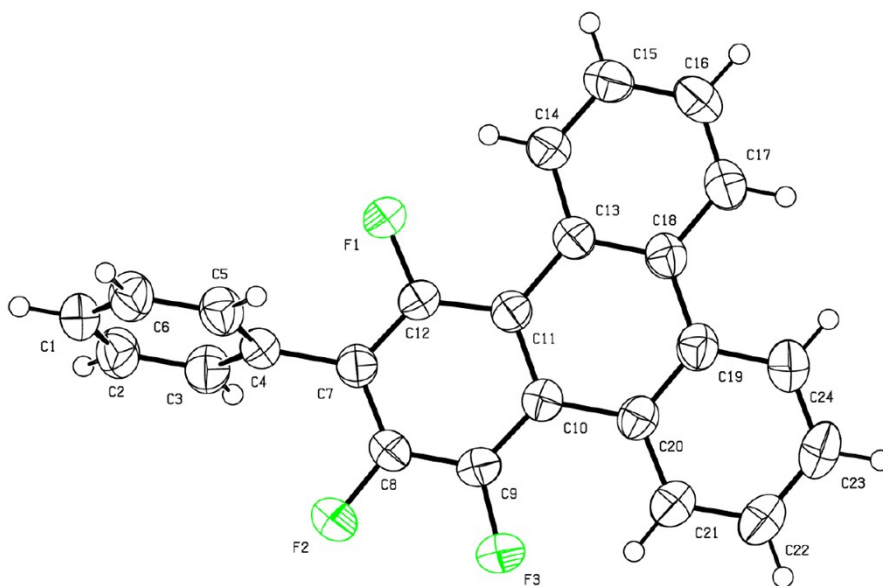

**Figure S69** Atoms' numbering in PHO.

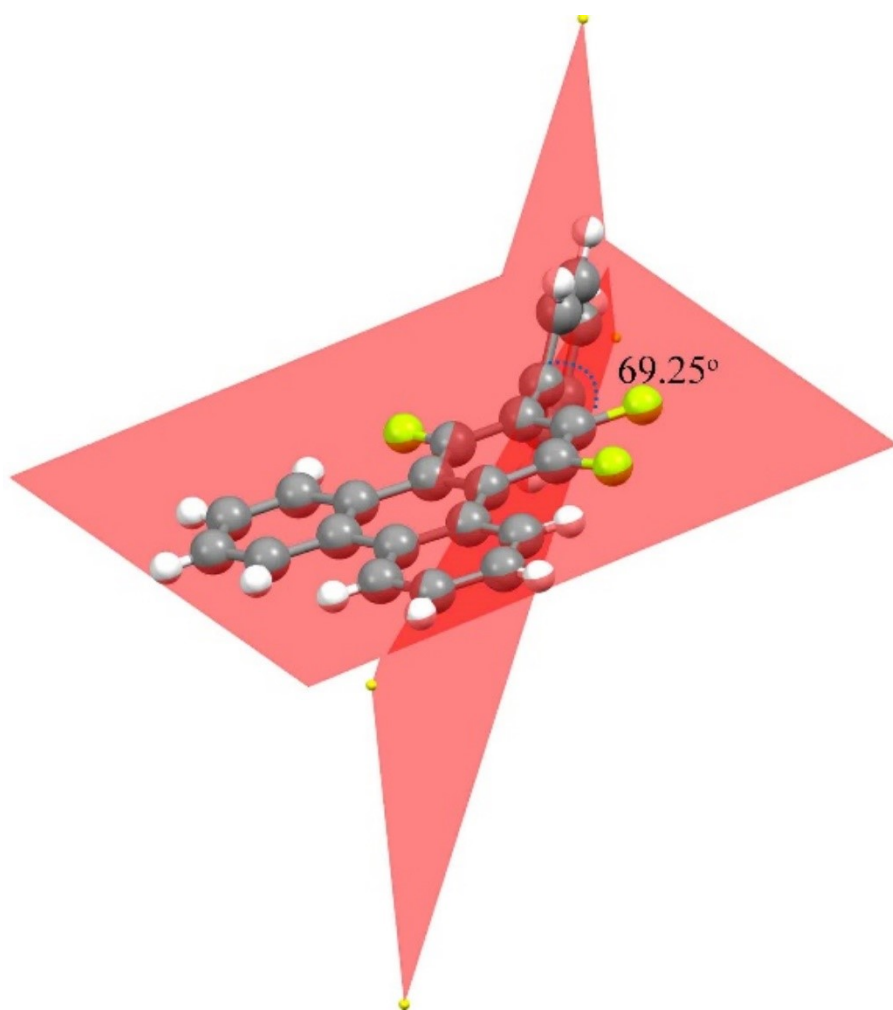

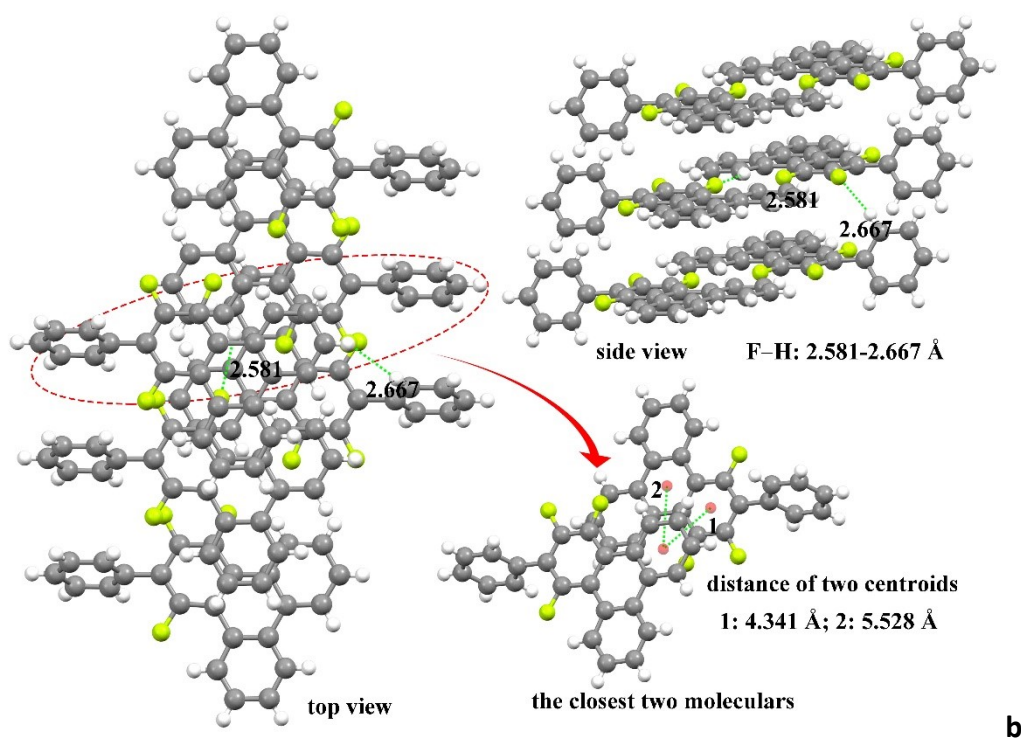

**Figure S70** a) Torsional angle between triphenylene core and phenyl group in **PHO** is  $69.25^\circ$ . The triphenylene moiety is perfectly planar, and all atoms of the TP core lie in one surface; b) Different views of molecular packing.

**Table S2.** Fractional atomic coordinates ( $\text{\AA} \times 10^4$ ) and the equivalent isotropic displacement parameter ( $\text{\AA}^2 \times 10^3$ ) of the compound **PHO**.

| Atom | x          | y          | z         | U(eq)   |
|------|------------|------------|-----------|---------|
| F2   | 3193.7(7)  | 1447.1(17) | 6152.5(4) | 66.2(3) |
| F3   | 4083.0(8)  | 1434.8(18) | 5255.1(5) | 69.6(3) |
| F1   | 1189.1(8)  | 8109.1(18) | 5402.6(4) | 73.6(3) |
| C10  | 3144.1(9)  | 4907(2)    | 4786.9(6) | 40.3(3) |
| C4   | 1691.5(10) | 4846(2)    | 6326.1(6) | 42.9(3) |
| C13  | 2060.4(10) | 8470(2)    | 4347.8(6) | 41.4(3) |
| C11  | 2367.6(10) | 6654(2)    | 4824.7(6) | 40.2(3) |
| C20  | 3653.6(10) | 4955(2)    | 4272.4(6) | 43.0(3) |
| C7   | 2169.9(10) | 4838(2)    | 5790.5(6) | 43.2(3) |
| C8   | 2906.7(11) | 3154(2)    | 5725.8(6) | 46.0(3) |
| C18  | 2543.4(11) | 8462(2)    | 3851.0(6) | 45.4(3) |
| C9   | 3374.7(10) | 3190(2)    | 5247.0(7) | 45.9(3) |
| C12  | 1928.9(11) | 6511(2)    | 5334.5(6) | 45.2(3) |
| C19  | 3350.4(11) | 6691(3)    | 3818.7(6) | 48.4(3) |
| C14  | 1301.2(11) | 10251(3)   | 4352.9(6) | 49.6(3) |
| C5   | 1913.9(12) | 6686(3)    | 6747.0(7) | 51.5(3) |

|     |            |          |           |         |
|-----|------------|----------|-----------|---------|
| C1  | 822.8(12)  | 4852(3)  | 7329.7(7) | 55.2(4) |
| C3  | 1027.8(12) | 3011(3)  | 6412.6(7) | 52.7(4) |
| C15 | 1032.1(12) | 11927(3) | 3902.6(7) | 54.5(4) |
| C6  | 1486.9(13) | 6674(3)  | 7251.0(7) | 56.4(4) |
| C21 | 4436.1(12) | 3306(3)  | 4216.6(7) | 55.3(4) |
| C16 | 1510.4(12) | 11912(3) | 3421.0(7) | 58.0(4) |
| C2  | 590.9(13)  | 3034(3)  | 6909.9(7) | 57.5(4) |
| C17 | 2243.2(12) | 10211(3) | 3397.9(7) | 57.8(4) |
| C22 | 4894.6(14) | 3354(3)  | 3730.7(8) | 64.9(4) |
| C24 | 3843.1(16) | 6687(3)  | 3330.2(8) | 70.1(5) |
| C23 | 4595.7(16) | 5055(4)  | 3286.4(9) | 75.5(5) |

**Table S3.** anisotropic displacement parameters of the compound **PH0(A2×103)**.

| Atom | U <sub>11</sub> | U <sub>22</sub> | U <sub>33</sub> | U <sub>23</sub> | U <sub>13</sub> | U <sub>12</sub> |
|------|-----------------|-----------------|-----------------|-----------------|-----------------|-----------------|
| F2   | 75.2(6)         | 63.3(6)         | 65.8(6)         | 26.9(4)         | 27.9(5)         | 21.7(5)         |
| F3   | 73.1(6)         | 67.3(6)         | 77.0(6)         | 21.4(5)         | 34.8(5)         | 33.7(5)         |
| F1   | 97.8(7)         | 72.1(6)         | 63.2(6)         | 20.1(5)         | 44.1(5)         | 44.3(6)         |
| C10  | 40.6(6)         | 40.4(7)         | 40.1(7)         | -3.2(5)         | 9.2(5)          | -3.3(5)         |
| C4   | 48.9(7)         | 41.5(7)         | 39.5(7)         | 4.3(5)          | 11.9(5)         | 4.2(5)          |
| C13  | 46.2(6)         | 38.6(7)         | 38.2(7)         | -3.0(5)         | 6.8(5)          | -2.9(5)         |
| C11  | 44.6(6)         | 37.5(6)         | 38.6(7)         | -2.9(5)         | 9.1(5)          | -0.7(5)         |
| C20  | 43.7(7)         | 43.9(7)         | 42.7(7)         | -5.7(6)         | 12.0(5)         | -2.8(5)         |
| C7   | 48.1(7)         | 41.3(7)         | 41.7(7)         | 0.0(5)          | 13.0(5)         | -0.9(5)         |
| C8   | 50.4(7)         | 42.9(7)         | 45.6(8)         | 9.5(6)          | 12.1(6)         | 3.7(6)          |
| C18  | 50.7(7)         | 44.9(7)         | 40.7(7)         | -0.4(6)         | 10.3(6)         | -3.8(6)         |
| C9   | 43.9(6)         | 44.0(7)         | 51.1(8)         | 2.4(6)          | 13.0(6)         | 8.1(6)          |
| C12  | 51.8(7)         | 41.5(7)         | 44.6(7)         | -0.3(6)         | 15.5(6)         | 8.3(6)          |
| C19  | 55.2(7)         | 48.9(8)         | 43.2(7)         | -3.6(6)         | 15.4(6)         | -3.5(6)         |
| C14  | 54.1(8)         | 49.6(8)         | 45.1(8)         | 2.8(6)          | 10.9(6)         | 7.0(6)          |
| C5   | 60.4(8)         | 46.3(8)         | 49.1(8)         | -0.1(6)         | 14.8(6)         | -7.1(6)         |
| C1   | 65.8(9)         | 60.0(9)         | 44.6(8)         | 7.5(7)          | 22.4(7)         | 9.5(7)          |
| C3   | 64.8(9)         | 43.2(7)         | 53.3(8)         | -4.3(6)         | 20.1(7)         | -4.5(6)         |
| C15  | 56.0(8)         | 49.4(8)         | 55.4(9)         | 5.1(7)          | 6.4(7)          | 8.0(6)          |
| C6   | 73.1(10)        | 53.2(8)         | 44.0(8)         | -5.6(6)         | 15.5(7)         | 0.0(7)          |
| C21  | 55.5(8)         | 58.9(9)         | 54.5(9)         | -2.1(7)         | 18.8(7)         | 8.0(7)          |
| C16  | 62.9(9)         | 56.0(9)         | 52.4(9)         | 16.1(7)         | 6.8(7)          | 2.9(7)          |
| C2   | 67.6(9)         | 50.3(8)         | 60.9(9)         | 5.4(7)          | 28.1(7)         | -5.9(7)         |
| C17  | 63.4(9)         | 64.4(9)         | 48.1(8)         | 10.4(7)         | 17.7(7)         | 1.5(8)          |
| C22  | 66.4(9)         | 70.7(11)        | 64.2(10)        | -8.1(8)         | 28.7(8)         | 10.5(8)         |
| C24  | 91.4(12)        | 72.8(11)        | 54.9(10)        | 11.0(8)         | 35.0(9)         | 14.6(10)        |

C23 89.8(13) 86.3(13) 63.4(10) -1.8(10) 44.9(9) 11.3(11)

**Table S4.** The bond length of the compound PHO.

| Atom | Atom | Length/Å   | Atom | Atom | Length/Å   |
|------|------|------------|------|------|------------|
| F2   | C8   | 1.3476(15) | C7   | C12  | 1.3742(19) |
| F3   | C9   | 1.3479(15) | C8   | C9   | 1.367(2)   |
| F1   | C12  | 1.3544(15) | C18  | C19  | 1.464(2)   |
| C10  | C11  | 1.4280(18) | C18  | C17  | 1.406(2)   |
| C10  | C20  | 1.4746(18) | C19  | C24  | 1.408(2)   |
| C10  | C9   | 1.3968(19) | C14  | C15  | 1.370(2)   |
| C4   | C7   | 1.4925(18) | C5   | C6   | 1.386(2)   |
| C4   | C5   | 1.384(2)   | C1   | C6   | 1.375(2)   |
| C4   | C3   | 1.385(2)   | C1   | C2   | 1.375(2)   |
| C13  | C11  | 1.4692(19) | C3   | C2   | 1.380(2)   |
| C13  | C18  | 1.4163(19) | C15  | C16  | 1.381(2)   |
| C13  | C14  | 1.4101(19) | C21  | C22  | 1.374(2)   |
| C11  | C12  | 1.4096(19) | C16  | C17  | 1.362(2)   |
| C20  | C19  | 1.403(2)   | C22  | C23  | 1.374(3)   |
| C20  | C21  | 1.4077(19) | C24  | C23  | 1.366(3)   |
| C7   | C8   | 1.3812(19) |      |      |            |

**Table S5.** The bond angle of the compound PHO.

| Atom | Atom | Atom | Angle/°    |  | Atom | Atom | Atom | Angle/°    |
|------|------|------|------------|--|------|------|------|------------|
| C11  | C10  | C20  | 119.85(12) |  | C17  | C18  | C19  | 121.05(13) |
| C9   | C10  | C11  | 117.18(12) |  | F3   | C9   | C10  | 122.49(12) |
| C9   | C10  | C20  | 122.96(12) |  | F3   | C9   | C8   | 114.53(12) |
| C5   | C4   | C7   | 120.20(12) |  | C8   | C9   | C10  | 122.98(12) |
| C5   | C4   | C3   | 119.06(13) |  | F1   | C12  | C11  | 119.85(12) |
| C3   | C4   | C7   | 120.74(12) |  | F1   | C12  | C7   | 114.02(12) |
| C18  | C13  | C11  | 119.12(12) |  | C7   | C12  | C11  | 126.13(12) |
| C14  | C13  | C11  | 123.65(12) |  | C20  | C19  | C18  | 121.04(12) |
| C14  | C13  | C18  | 117.23(12) |  | C20  | C19  | C24  | 118.19(14) |
| C10  | C11  | C13  | 120.31(12) |  | C24  | C19  | C18  | 120.77(14) |
| C12  | C11  | C10  | 116.42(12) |  | C15  | C14  | C13  | 122.39(14) |
| C12  | C11  | C13  | 123.27(12) |  | C4   | C5   | C6   | 120.37(14) |
| C19  | C20  | C10  | 119.29(12) |  | C2   | C1   | C6   | 119.82(14) |
| C19  | C20  | C21  | 118.35(13) |  | C2   | C3   | C4   | 120.27(14) |
| C21  | C20  | C10  | 122.36(13) |  | C14  | C15  | C16  | 119.97(14) |
| C8   | C7   | C4   | 121.75(12) |  | C1   | C6   | C5   | 120.03(14) |
| C12  | C7   | C4   | 123.00(12) |  | C22  | C21  | C20  | 121.68(15) |

|     |     |     |            |  |     |     |     |            |
|-----|-----|-----|------------|--|-----|-----|-----|------------|
| C12 | C7  | C8  | 115.23(12) |  | C17 | C16 | C15 | 119.39(14) |
| F2  | C8  | C7  | 119.35(12) |  | C1  | C2  | C3  | 120.42(14) |
| F2  | C8  | C9  | 118.60(12) |  | C16 | C17 | C18 | 122.45(14) |
| C9  | C8  | C7  | 122.03(12) |  | C23 | C22 | C21 | 119.88(15) |
| C13 | C18 | C19 | 120.37(12) |  | C23 | C24 | C19 | 122.14(16) |
| C17 | C18 | C13 | 118.57(13) |  | C24 | C23 | C22 | 119.75(16) |

**Table S6.** Hydrogen atomic coordinates ( $A \times 10^4$ ) and the isotropic displacement parameters ( $A^2 \times 10^3$ ).

| Atom | <i>x</i> | <i>y</i> | <i>z</i> | U(eq) |
|------|----------|----------|----------|-------|
| H14  | 971      | 10288    | 4674     | 59    |
| H5   | 2352     | 7937     | 6691     | 62    |
| H1   | 531      | 4851     | 7666     | 66    |
| H3   | 876      | 1759     | 6134     | 63    |
| H15  | 528      | 13075    | 3921     | 65    |
| H6   | 1650     | 7899     | 7536     | 68    |
| H21  | 4648     | 2156     | 4516     | 66    |
| H16  | 1334     | 13052    | 3115     | 70    |
| H2   | 137      | 1811     | 6961     | 69    |
| H17  | 2557     | 10206    | 3070     | 69    |
| H22  | 5406     | 2238     | 3703     | 78    |
| H24  | 3650     | 7834     | 3027     | 84    |
| H23  | 4905     | 5094     | 2957     | 91    |

## 6. TGA

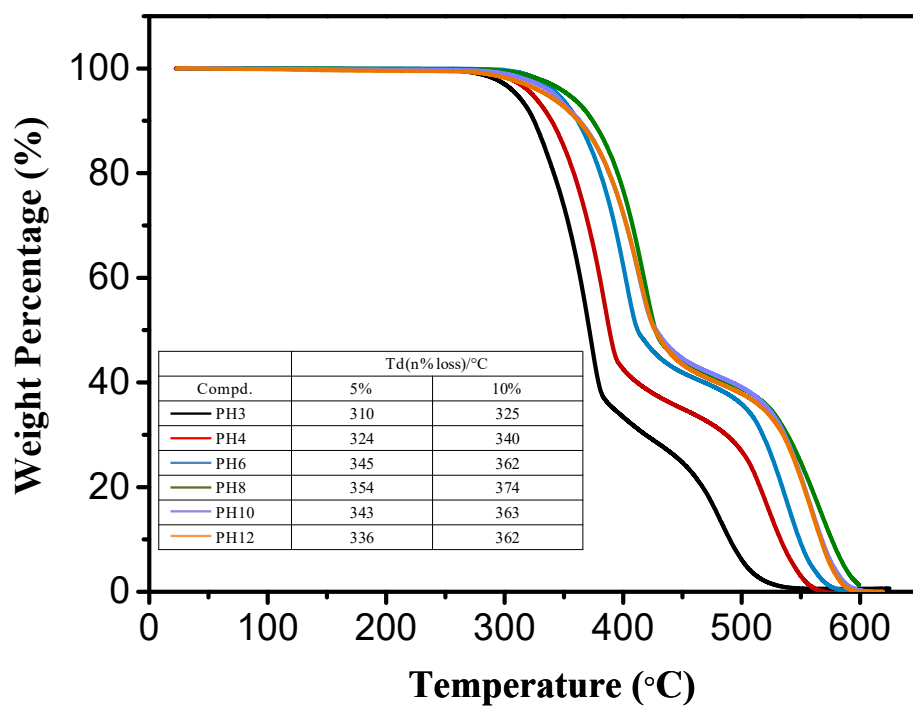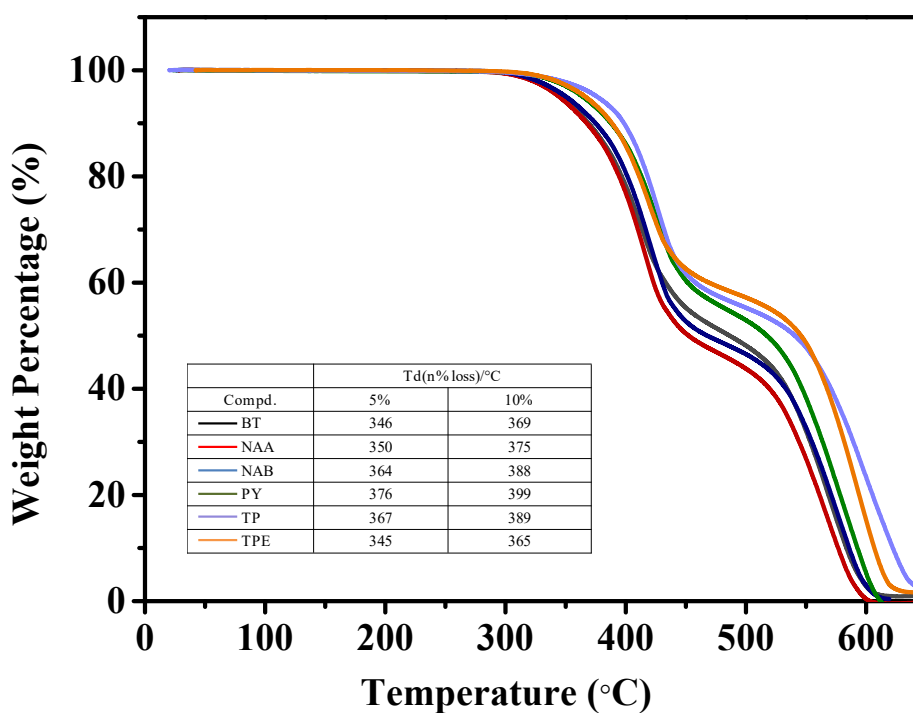

Figure S71 TGA thermograms of PH $n$  and 2-aryl-1,3,4-trifluorotriphenylenes (heating rate 10 °C/min).



## 7. POM

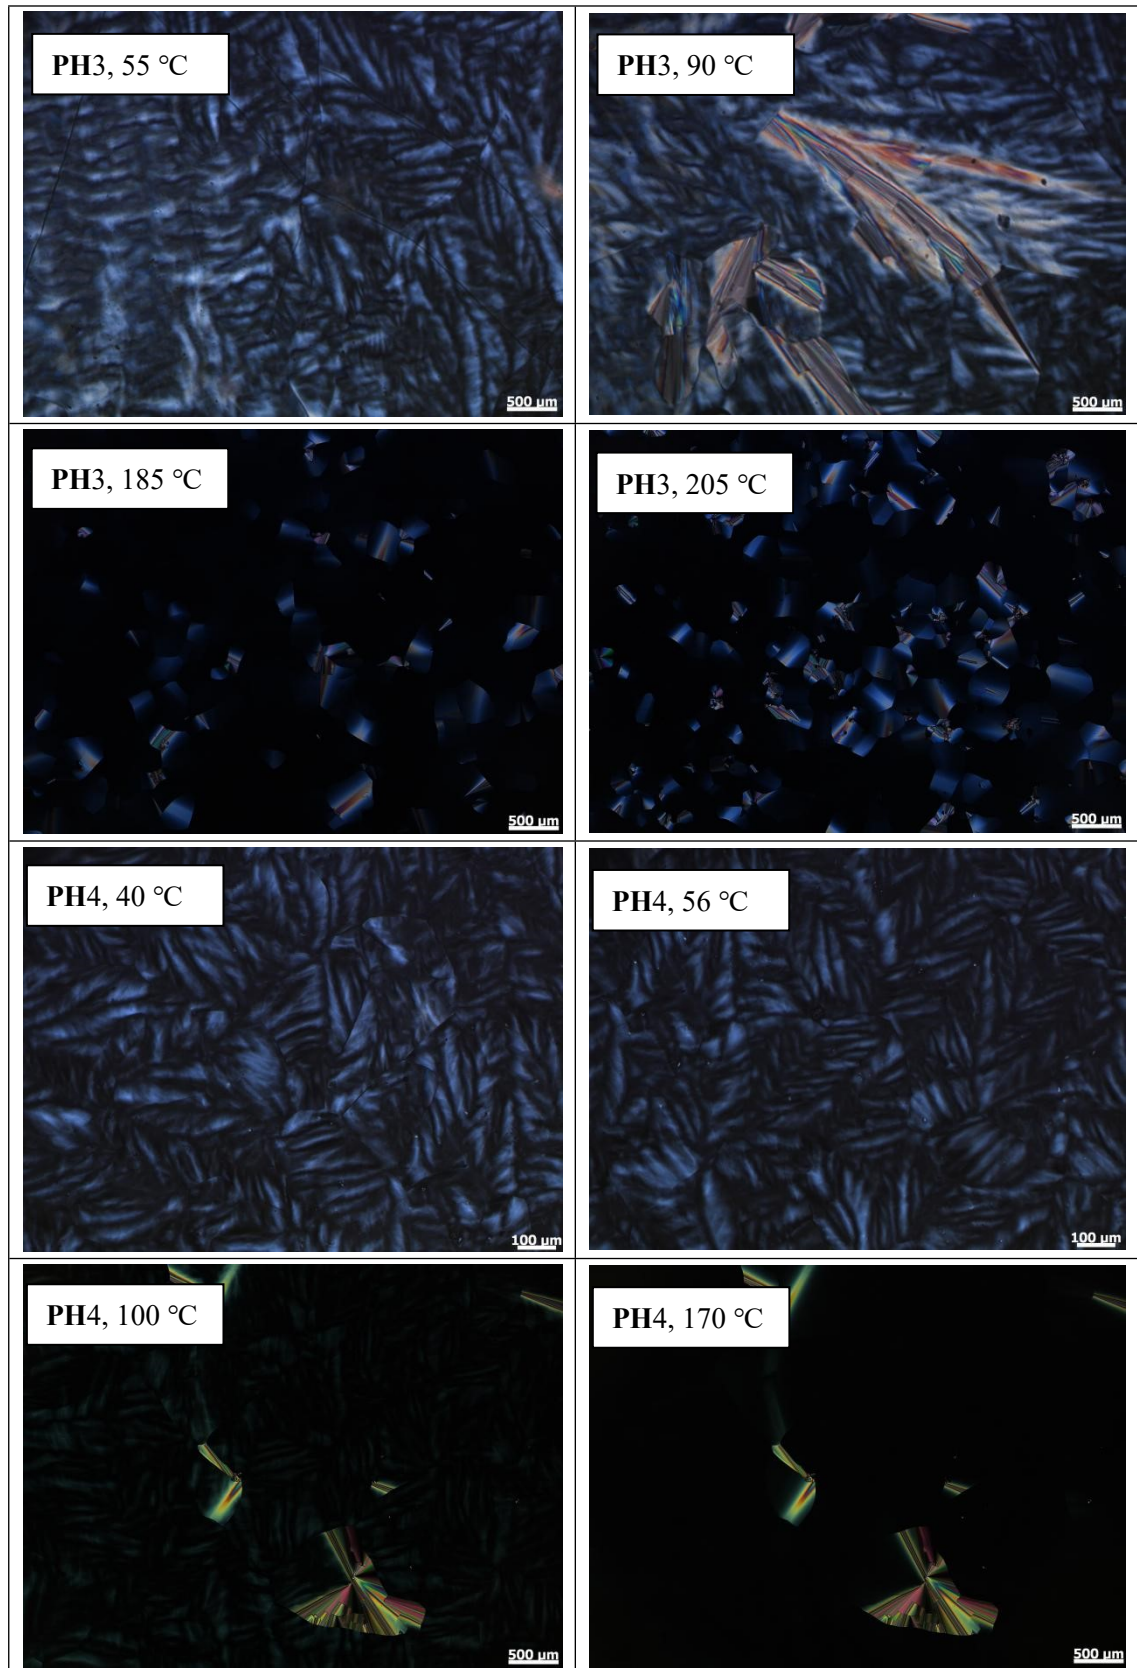

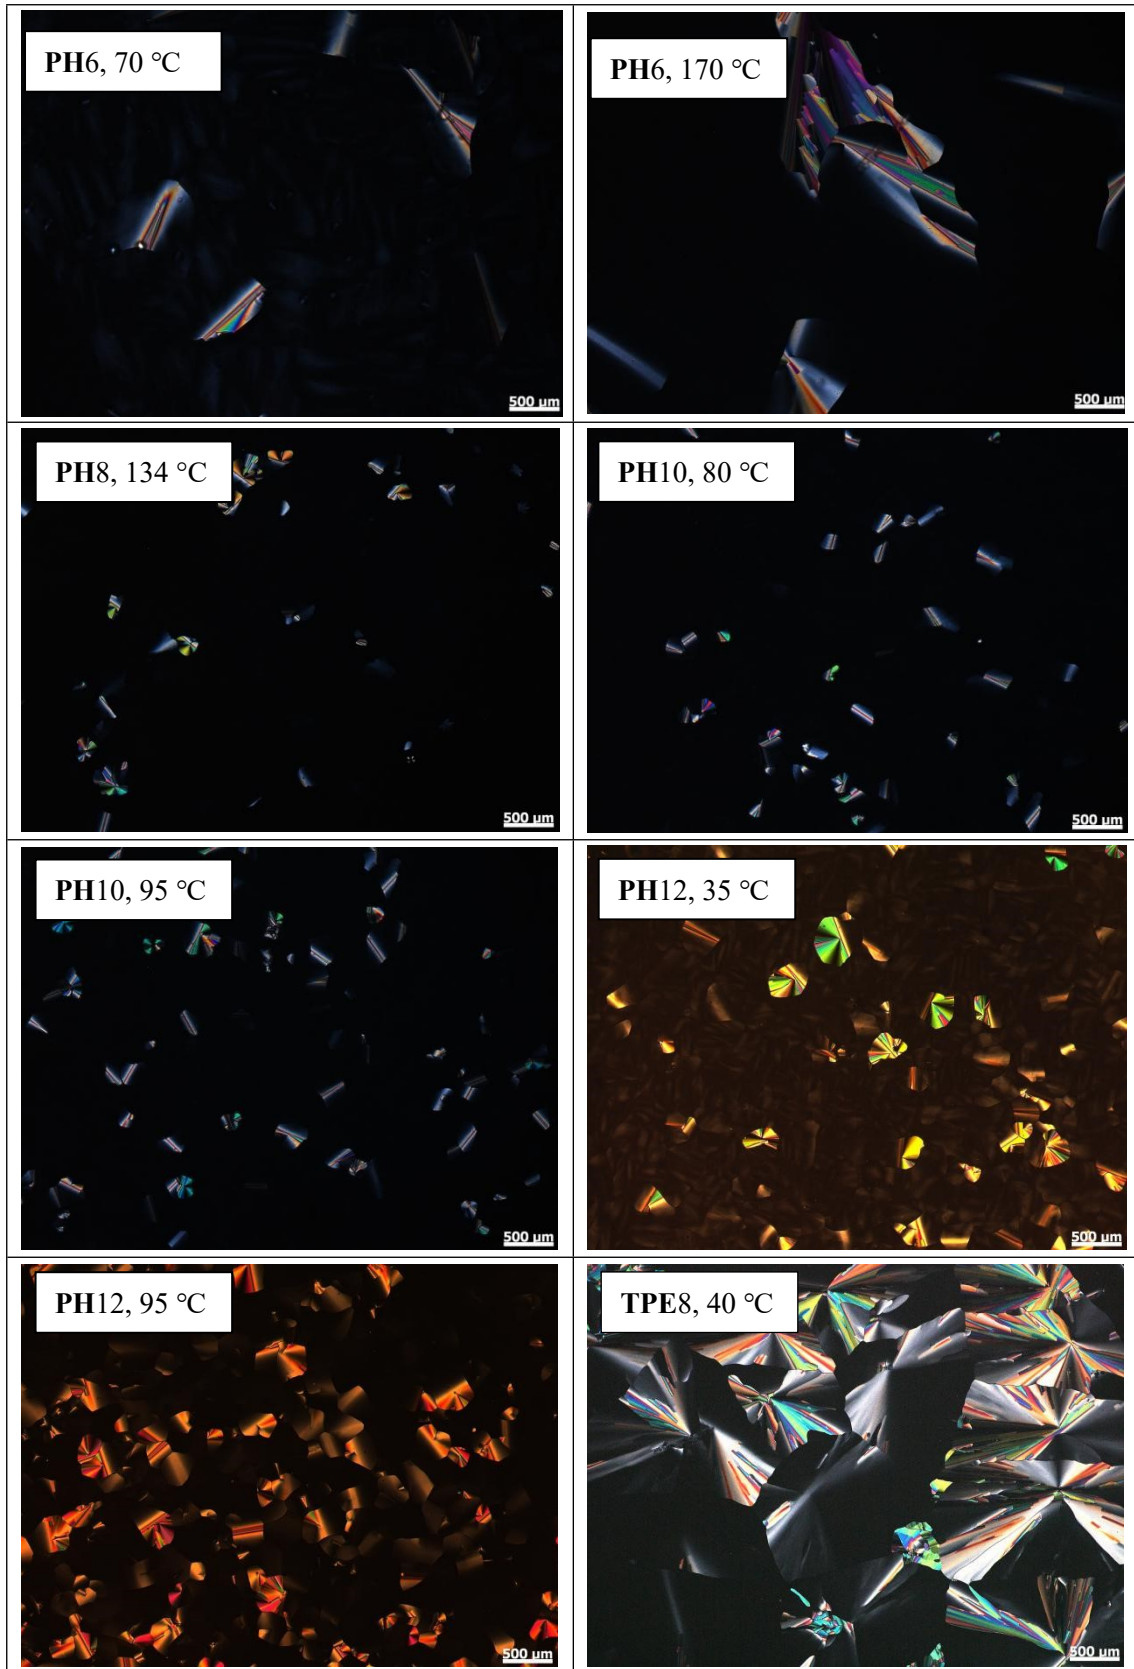



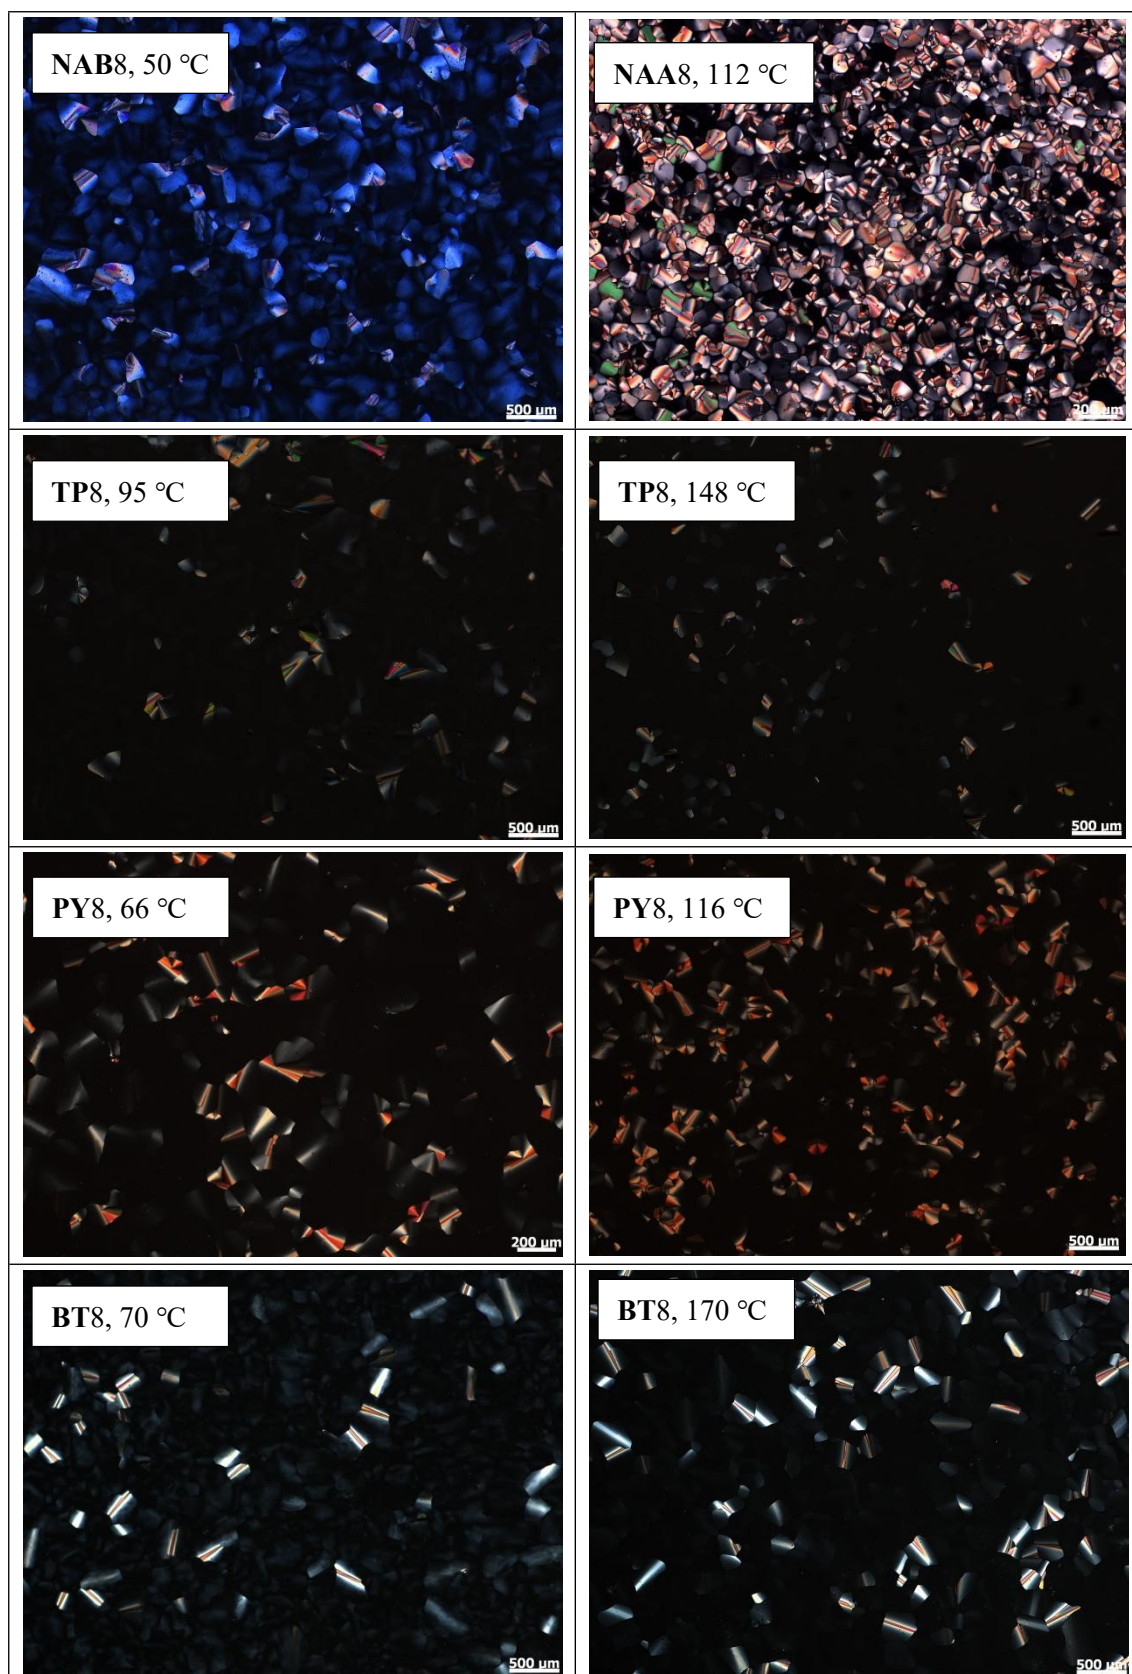

**Figure S72** POM textures of *PH<sub>n</sub>* and 2-aryl-1,3,4-trifluorotriphenylenes, taken at various temperatures on cooling from the isotropic liquid.

## 8. DSC

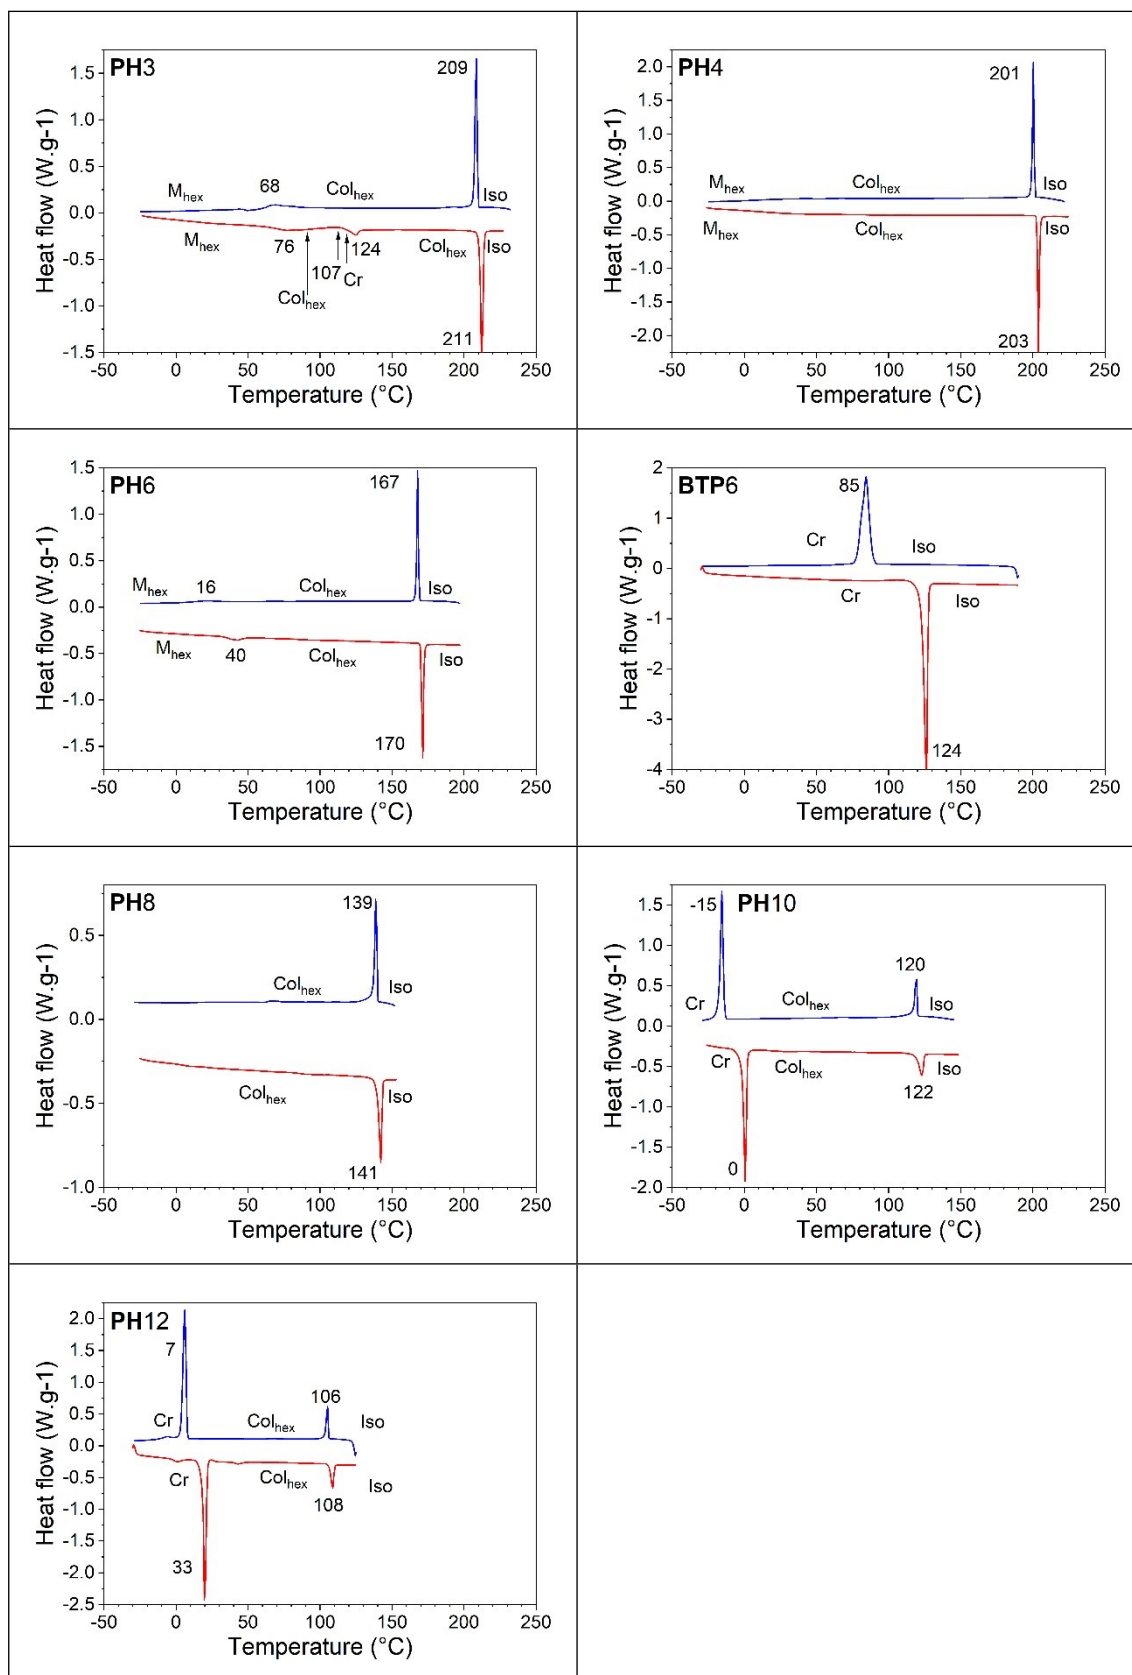

Figure S73 DSC of PH<sub>n</sub> terms and BTP6 (heating/cooling rate 10 °C/min).

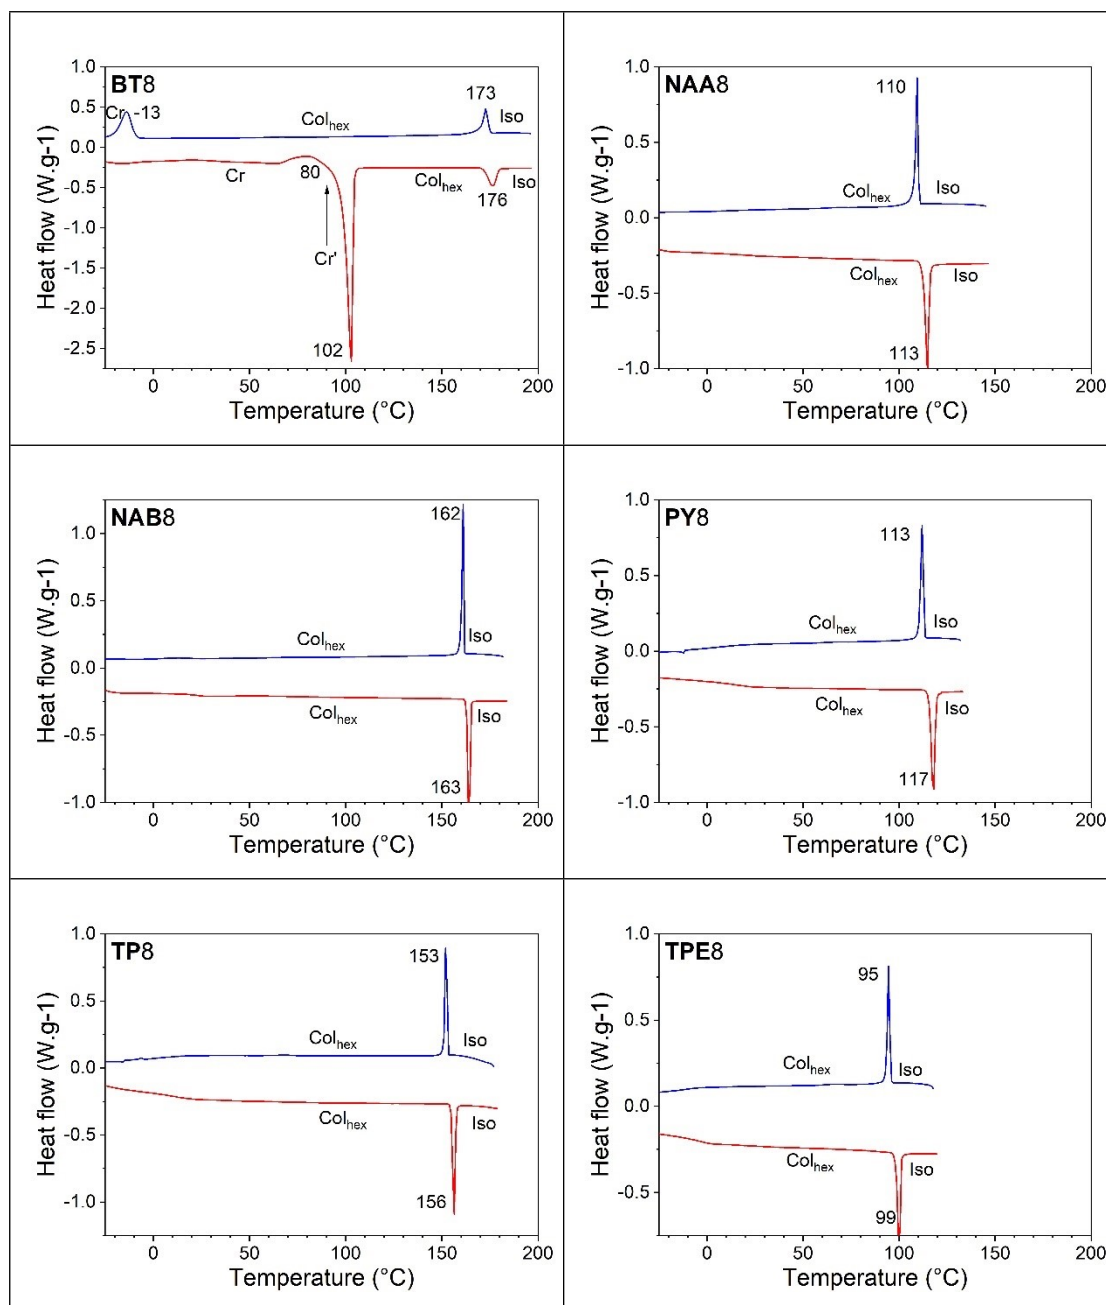

**Figure S74** DSC of the 2-aryl-1,3,4-trifluorotriphenylenes (heating/cooling rate 10 °C/min).

**Table S7.** Phase transition parameters of **PH<sub>n</sub>** and 2-aryl-1,3,4-trifluorotriphenylenes (heating and cooling rate of 10 °C/min).

| Compds      | 2 <sup>nd</sup> heating (1 <sup>st</sup> cooling)/°C (ΔH, kJ·mol <sup>-1</sup> )            |                                                          |
|-------------|---------------------------------------------------------------------------------------------|----------------------------------------------------------|
| <b>PH3</b>  | M <sub>hex</sub> 76 (-) Col <sub>hex</sub> 107 Cr 124 (3.3) Col <sub>hex</sub> 211 (11.8) I | I 209 (-11.2) Col <sub>hex</sub> 68 (-) M <sub>hex</sub> |
| <b>PH4</b>  | M <sub>hex</sub> 43 (-) Col <sub>hex</sub> 203 (9.4) I                                      | I 201 (-9.7) Col <sub>hex</sub> 29 (-) M <sub>hex</sub>  |
| <b>PH6</b>  | M <sub>hex</sub> 40 (-) Col <sub>hex</sub> 170 (8.3) I                                      | I 167 (-8.3) Col <sub>hex</sub> 16 (-) M <sub>hex</sub>  |
| <b>BTP6</b> | Cr 124 (44.4) I                                                                             | I 85 (-52.8) Cr                                          |
| <b>PH8</b>  | Col <sub>hex</sub> 141 (6.7) I                                                              | I 139 (-6.6) Col <sub>hex</sub>                          |
| <b>PH10</b> | Cr -0 (25.5) Col <sub>hex</sub> 122 (6.0) I                                                 | I 120 (-5.7) Col <sub>hex</sub> -15 (-22.3) Cr           |

|             |                                                            |                                               |
|-------------|------------------------------------------------------------|-----------------------------------------------|
| <b>PH12</b> | Cr 33 (35.8) Col <sub>hex</sub> 108 (5.9) I                | I 106 (-5.6) Col <sub>hex</sub> 7 (-34.6) Cr  |
| <b>BT8</b>  | Cr 80 (-5.0) Cr' 102 (55.1) Col <sub>hex</sub> 176 (5.9) I | I 173 (-5.2) Col <sub>hex</sub> -13 (-5.9) Cr |
| <b>NAA8</b> | Col <sub>hex</sub> 113 (8.2) I                             | I 110 (-7.6) Col <sub>hex</sub>               |
| <b>NAB8</b> | Col <sub>hex</sub> 163 (7.7) I                             | I 162 (-7.5) Col <sub>hex</sub>               |
| <b>PY8</b>  | Col <sub>hex</sub> 117 (9.7) I                             | I 113 (-8.0) Col <sub>hex</sub>               |
| <b>TP8</b>  | Col <sub>hex</sub> 156 (8.1) I                             | I 153 (-7.6) Col <sub>hex</sub>               |
| <b>TPE8</b> | Col <sub>hex</sub> 99 (7.0) I                              | I 95 (7.1) Col <sub>hex</sub>                 |

[a] Cr, Cr': crystalline phases; Col<sub>hex</sub>: columnar hexagonal phase; M<sub>hex</sub>: 3D columnar hexagonal phase; I: isotropic liquid

## 9. S/WAXS

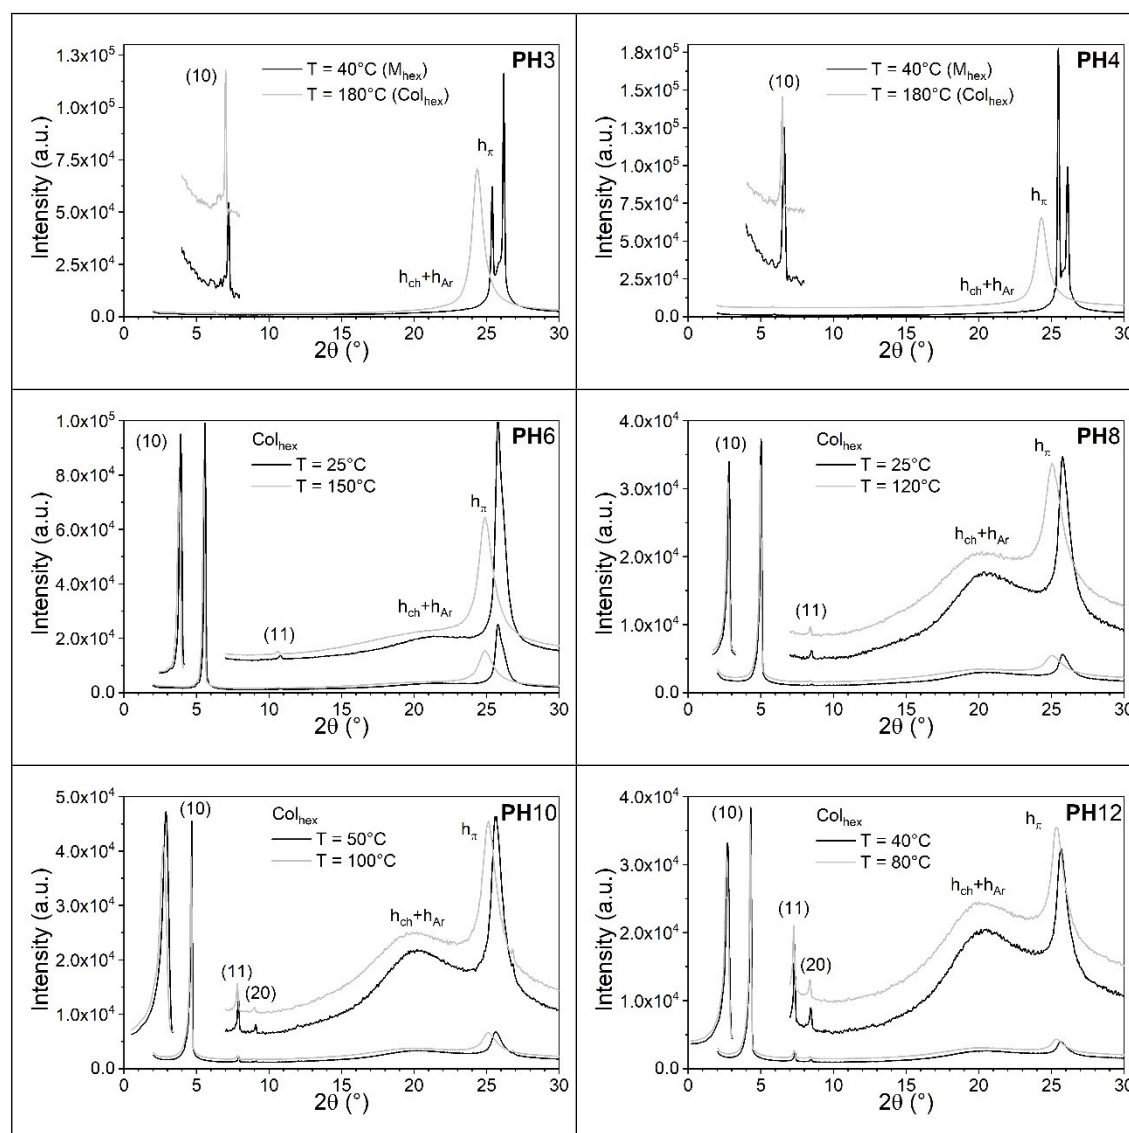

Figure S75 S/WAXS patterns of PH<sub>n</sub>.



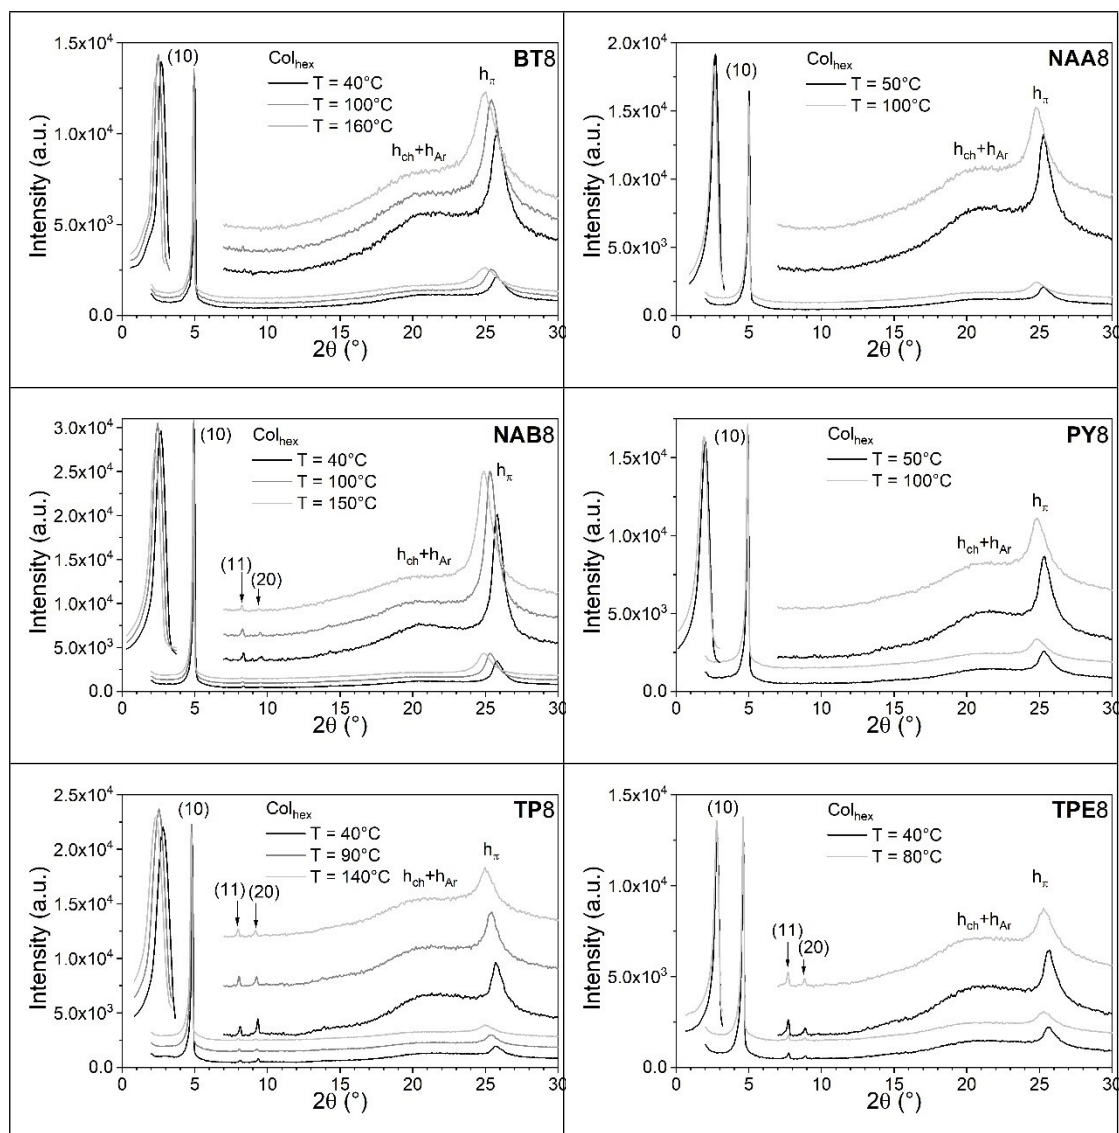

**Figure S76** S/WAXS patterns of the mesophases of the 2-aryl-1,3,4-trifluorotriphenylenes compounds.

**Table S8.** Mesophases' parameters of PH $n$  and 2-aryl-1,3,4-trifluorotriphenylenes

| Compds     | Temp. (°C) | $2\theta_{\text{exp}}$ (°) | $d_{\text{exp}}$ (Å) | $d_{\text{calc}}$ (Å) | l (shape) | $hk/h(\xi)$     | Lattice parameters                                                                |
|------------|------------|----------------------------|----------------------|-----------------------|-----------|-----------------|-----------------------------------------------------------------------------------|
| <b>PH3</b> | 180        | 6.249                      | 14.13                | 14.13                 | VW (sh)   | 10              | $\text{Col}_{\text{hex}}$<br>$a = 16.32 \text{ \AA}$<br>$A = 230.6 \text{ \AA}^2$ |
|            |            | 24.36                      | 3.65                 | -                     | VS (sh)   | $h_{\pi}$ (87)  |                                                                                   |
|            |            | 24.56                      | 3.62                 | -                     | VW (br)   | $h_{\text{ch}}$ |                                                                                   |
| <b>PH4</b> | 180        | 5.848                      | 15.10                | 15.12                 | VW (sh)   | 10              | $\text{Col}_{\text{hex}}$<br>$a = 17.43 \text{ \AA}$<br>$A = 263.3 \text{ \AA}^2$ |
|            |            | 24.31                      | 3.66                 | -                     | VS (sh)   | $h_{\pi}$ (84)  |                                                                                   |
|            |            | 24.52                      | 3.63                 | -                     | VW (br)   | $h_{\text{ch}}$ |                                                                                   |
| <b>PH6</b> | 150        | 5.531                      | 16.50                | 16.49                 | VS (sh)   | 10              | $\text{Col}_{\text{hex}}$<br>$a = 19.04 \text{ \AA}$<br>$A = 314.0 \text{ \AA}^2$ |
|            |            | 10.727                     | 8.24                 | 8.24                  | VW (sh)   | 20              |                                                                                   |
|            |            | 21.28                      | 4.17                 | -                     | VW (br)   | $h_{\text{ch}}$ |                                                                                   |
|            |            | 24.94                      | 3.57                 | -                     | VS (sh)   | $h_{\pi}$ (51)  |                                                                                   |
| ---        | 25         | 5.417                      | 16.30                | 16.31                 | VS (sh)   | 10              | $\text{Col}_{\text{hex}}$<br>$a = 18.83$<br>$A = 307.2$                           |
|            |            | 10.838                     | 8.16                 | 8.15                  | VW (sh)   | 20              |                                                                                   |
|            |            | 21.13                      | 4.20                 | -                     | VW (br)   | $h_{\text{ch}}$ |                                                                                   |
|            |            | 25.89                      | 3.44                 | -                     | VS (sh)   | $h_{\pi}$ (85)  |                                                                                   |

|             |       |       |       |       |         |                     |                                                               |
|-------------|-------|-------|-------|-------|---------|---------------------|---------------------------------------------------------------|
| <b>PH8</b>  | 120   | 4.891 | 18.05 | 18.05 | VS (sh) | 10                  | Col <sub>hex</sub><br>a = 20.84 Å<br>A = 376.2 Å <sup>2</sup> |
|             |       | 8.477 | 10.42 | 10.42 | VW (sh) | 11                  |                                                               |
|             |       | 20.01 | 4.43  | -     | S (br)  | h <sub>ch</sub>     |                                                               |
|             |       | 25.05 | 3.54  | -     | VS (sh) | h <sub>π</sub> (48) |                                                               |
|             | 25    | 4.950 | 17.84 | 17.85 | VS (sh) | 10                  | 20.61<br>367.7                                                |
|             |       | 8.565 | 10.31 | 10.30 | VW (sh) | 11                  |                                                               |
|             |       | 20.49 | 4.34  | -     | S (br)  | h <sub>ch</sub>     |                                                               |
|             |       | 25.88 | 3.44  | -     | VS (sh) | h <sub>π</sub> (59) |                                                               |
| <b>PH10</b> | 100   | 4.509 | 19.58 | 19.58 | VS (sh) | 10                  | Col <sub>hex</sub><br>a = 22.61 Å<br>A = 442.6 Å <sup>2</sup> |
|             |       | 7.83  | 11.28 | 11.30 | VW (sh) | 11                  |                                                               |
|             |       | 9.00  | 9.81  | 9.79  | VW (sh) | 20                  |                                                               |
|             |       | 19.87 | 4.46  | -     | VS (br) | h <sub>ch</sub>     |                                                               |
|             | 50    | 25.13 | 3.54  | -     | VS (sh) | h <sub>π</sub> (59) | Col <sub>hex</sub><br>a = 22.22 Å<br>A = 427.6 Å <sup>2</sup> |
|             |       | 4.589 | 19.24 | 19.24 | VS (sh) | 10                  |                                                               |
|             |       | 7.957 | 11.10 | 11.11 | VW (sh) | 11                  |                                                               |
|             |       | 9.174 | 9.63  | 9.62  | VW (sh) | 20                  |                                                               |
|             | 20.04 | 20.04 | 4.43  | -     | VS (br) | h <sub>ch</sub>     | Col <sub>hex</sub><br>a = 24.19 Å<br>A = 506.8 Å <sup>2</sup> |
|             |       | 25.67 | 3.47  | -     | VS (sh) | h <sub>π</sub> (68) |                                                               |
|             |       | 4.27  | 20.95 | 20.95 | VS (sh) | 10                  |                                                               |
|             |       | 7.307 | 12.09 | 12.09 | VW (sh) | 11                  |                                                               |
| <b>PH12</b> | 80    | 8.425 | 10.48 | 10.47 | VW (sh) | 20                  | Col <sub>hex</sub><br>a = 24.19 Å<br>A = 506.8 Å <sup>2</sup> |
|             |       | 19.92 | 4.45  | -     | VS (br) | h <sub>ch</sub>     |                                                               |
|             |       | 25.37 | 3.51  | -     | VS (sh) | h <sub>π</sub> (50) |                                                               |
|             |       | 4.220 | 20.92 | 20.92 | VS (sh) | 10                  |                                                               |
|             | 40    | 7.307 | 12.09 | 12.08 | VW (sh) | 11                  | Col <sub>hex</sub><br>a = 24.16 Å<br>A = 505.3 Å <sup>2</sup> |
|             |       | 8.456 | 10.45 | 10.46 | VW (sh) | 20                  |                                                               |
|             |       | 20.42 | 4.34  | -     | VS (br) | h <sub>ch</sub>     |                                                               |
|             |       | 25.70 | 3.46  | -     | VS (sh) | h <sub>π</sub> (66) |                                                               |
| <b>NAA8</b> | 100   | 4.908 | 17.99 | 17.99 | VS (sh) | 10                  | Col <sub>hex</sub><br>a = 20.77 Å<br>A = 373.7 Å <sup>2</sup> |
|             |       | 19.90 | 4.46  | -     | VS (br) | h <sub>ch</sub>     |                                                               |
|             |       | 24.83 | 3.58  | -     | VS (sh) | h <sub>π</sub> (55) |                                                               |
|             |       | 4.943 | 17.86 | 17.86 | VS (sh) | 10                  |                                                               |
|             | 50    | 20.16 | 4.40  | -     | VS (br) | h <sub>ch</sub>     | Col <sub>hex</sub><br>a = 20.62 Å<br>A = 368.4 Å <sup>2</sup> |
|             |       | 25.32 | 3.51  | -     | VS (sh) | h <sub>π</sub> (67) |                                                               |
|             |       | 4.854 | 18.19 | 18.19 | VS (sh) | 10                  |                                                               |
|             |       | 20.91 | 4.24  | -     | VS (br) | h <sub>ch</sub>     |                                                               |
| <b>PY8</b>  | 100   | 24.86 | 3.58  | -     | VS (sh) | h <sub>π</sub> (50) | a = 21.00 Å<br>A = 382.1 Å <sup>2</sup>                       |
|             |       | 4.917 | 17.96 | 17.96 | VS (sh) | 10                  |                                                               |
|             |       | 21.23 | 4.18  | -     | VS (br) | h <sub>ch</sub>     |                                                               |
|             |       | 25.36 | 3.51  | -     | VS (sh) | h <sub>π</sub> (68) |                                                               |
|             | 50    | 4.440 | 19.84 | 19.84 | VS (sh) | 10                  | Col <sub>hex</sub><br>a = 22.91 Å<br>A = 454.5 Å <sup>2</sup> |
|             |       | 7.718 | 11.44 | 11.45 | VW (sh) | 11                  |                                                               |
|             |       | 8.898 | 9.93  | 9.92  | VW (sh) | 20                  |                                                               |
|             |       | 20.44 | 4.34  | -     | VS (br) | h <sub>ch</sub>     |                                                               |
|             | 80    | 25.28 | 3.52  | -     | VS (sh) | h <sub>π</sub> (53) | Col <sub>hex</sub><br>a = 22.79 Å<br>A = 449.7 Å <sup>2</sup> |
|             |       | 4.474 | 19.73 | 19.73 | VS (sh) | 10                  |                                                               |
|             |       | 7.755 | 11.39 | 11.39 | VW (sh) | 11                  |                                                               |
|             |       | 8.952 | 9.87  | 9.7   | VW (sh) | 20                  |                                                               |
|             | 40    | 20.76 | 4.27  | -     | VS (br) | h <sub>ch</sub>     | Col <sub>hex</sub><br>a = 20.67 Å<br>A = 370.0 Å <sup>2</sup> |
|             |       | 25.65 | 3.47  | -     | VS (sh) | h <sub>π</sub> (63) |                                                               |
|             |       | 4.880 | 18.09 | 18.09 | VS (sh) | 10                  |                                                               |
|             |       | 19.98 | 4.44  | -     | VS (br) | h <sub>ch</sub>     |                                                               |
| <b>BT8</b>  | 160   | 24.95 | 3.56  | -     | VS (sh) | h <sub>π</sub> (40) | Col <sub>hex</sub><br>a = 20.89 Å<br>A = 377.9 Å <sup>2</sup> |
|             |       | 4.932 | 17.90 | 17.90 | VS (sh) | 10                  |                                                               |
|             |       | 20.09 | 4.42  | -     | VS (br) | h <sub>ch</sub>     |                                                               |
|             |       | 25.44 | 3.50  | -     | VS (sh) | h <sub>π</sub> (54) |                                                               |
|             | 100   | 4.932 | 17.90 | 17.90 | VS (sh) | 10                  | Col <sub>hex</sub><br>a = 20.67 Å<br>A = 370.0 Å <sup>2</sup> |
|             |       | 20.09 | 4.42  | -     | VS (br) | h <sub>ch</sub>     |                                                               |
|             |       | 25.44 | 3.50  | -     | VS (sh) | h <sub>π</sub> (54) |                                                               |



|             |     |                                           |                                        |                                  |                                                     |                                              |                                                               |
|-------------|-----|-------------------------------------------|----------------------------------------|----------------------------------|-----------------------------------------------------|----------------------------------------------|---------------------------------------------------------------|
|             | 40  | 4.984<br>20.38<br>25.84                   | 17.71<br>4.35<br>3.44                  | 17.71<br>-<br>-                  | VS (sh)<br>VS (br)<br>VS (sh)                       | 10<br>$h_{ch}$<br>$h_{\pi}$ (59)             | Col <sub>hex</sub><br>a = 20.45 Å<br>A = 362.2 Å <sup>2</sup> |
| <b>NAB8</b> | 150 | 4.811<br>8.342<br>9.60<br>20.07<br>24.91  | 18.35<br>10.59<br>9.20<br>4.42<br>3.57 | 18.36<br>10.60<br>9.18<br>-<br>- | VS (sh)<br>VW (sh)<br>VW (sh)<br>VS (br)<br>VS (sh) | 10<br>11<br>20<br>$h_{ch}$<br>$h_{\pi}$ (54) | Col <sub>hex</sub><br>a = 21.20 Å<br>A = 389.4 Å <sup>2</sup> |
|             | 100 | 4.830<br>8.373<br>9.66<br>20.29<br>25.37  | 18.28<br>10.55<br>9.15<br>4.37<br>3.51 | 18.28<br>10.56<br>9.14<br>-<br>- | VS (sh)<br>VW (sh)<br>VW (sh)<br>VS (br)<br>VS (sh) | 10<br>11<br>20<br>$h_{ch}$<br>$h_{\pi}$ (72) | Col <sub>hex</sub><br>a = 21.11 Å<br>A = 386.0 Å <sup>2</sup> |
|             | 40  | 4.843<br>8.404<br>9.66<br>20.51<br>25.84  | 18.23<br>10.51<br>9.15<br>4.33<br>3.44 | 18.24<br>10.53<br>9.12<br>-<br>- | VS (sh)<br>VW (sh)<br>VW (sh)<br>VS (br)<br>VS (sh) | 10<br>11<br>20<br>$h_{ch}$<br>$h_{\pi}$ (78) | Col <sub>hex</sub><br>a = 21.07 Å<br>A = 384.4 Å <sup>2</sup> |
| <b>TP8</b>  | 140 | 4.615<br>7.993<br>9.247<br>20.28<br>24.98 | 19.13<br>11.05<br>9.56<br>4.37<br>3.56 | 19.13<br>11.04<br>9.56<br>-<br>- | VS (sh)<br>VW (sh)<br>VW (sh)<br>VS (br)<br>VS (sh) | 10<br>11<br>20<br>$h_{ch}$<br>$h_{\pi}$ (64) | Col <sub>hex</sub><br>a = 22.09 Å<br>A = 422.6 Å <sup>2</sup> |
|             | 90  | 4.655<br>8.081<br>9.304<br>20.44<br>25.38 | 18.96<br>10.93<br>9.50<br>4.34<br>3.51 | 18.96<br>10.95<br>9.48<br>-<br>- | VS (sh)<br>VW (sh)<br>VW (sh)<br>VS (br)<br>VS (sh) | 10<br>11<br>20<br>$h_{ch}$<br>$h_{\pi}$ (73) | Col <sub>hex</sub><br>a = 21.90 Å<br>A = 415.3 Å <sup>2</sup> |
|             | 40  | 4.697<br>8.144<br>9.398<br>20.77<br>25.76 | 18.80<br>10.85<br>9.40<br>4.27<br>3.45 | 18.80<br>10.85<br>9.40<br>-<br>- | VS (sh)<br>VW (sh)<br>VW (sh)<br>VS (br)<br>VS (sh) | 10<br>11<br>20<br>$h_{ch}$<br>$h_{\pi}$ (80) | Col <sub>hex</sub><br>a = 21.70 Å<br>A = 407.9 Å <sup>2</sup> |

Annotation:  $2\theta_{exp}$ : measured diffraction angles;  $d_{exp}$  and  $d_{cal}$ : measured and calculated distances; VS, S, M, W, VW stand for very strong, strong, medium, weak, very weak; sh and br stand for sharp and broad; hk: Miller indices of columnar lattice reflection;  $h_{ch}$ : average distance between alkyl chains;  $h_{\pi}$ : average distance of  $\pi$ - $\pi$  stacking of molecules, and  $\xi$ , correlation length; a: columnar lattice parameters; A: lattice area.

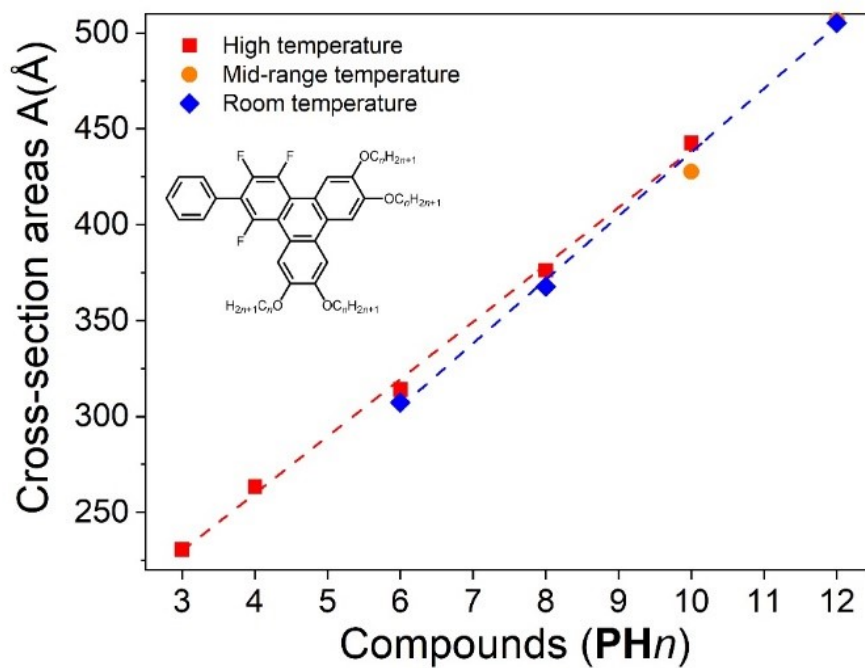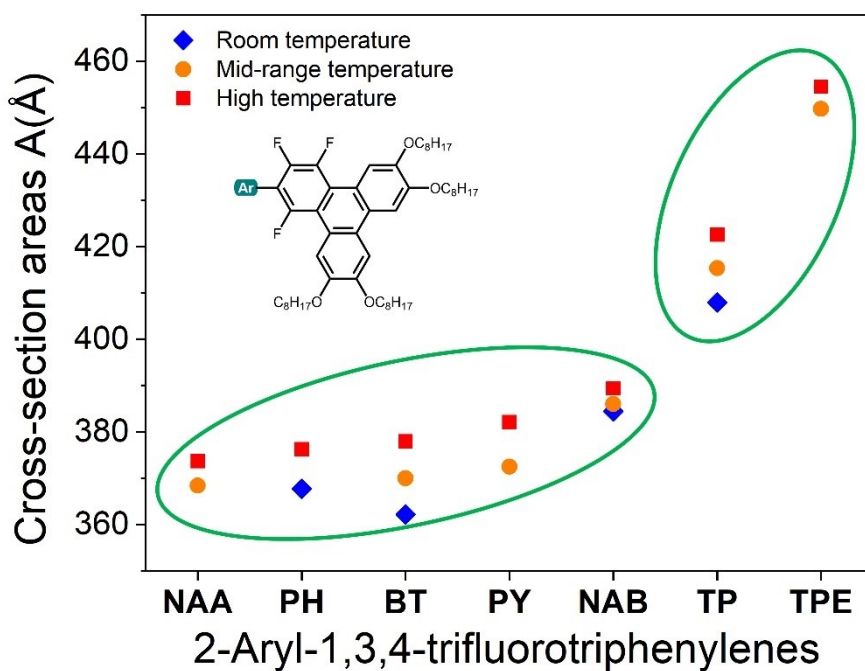

**Figure S77** Columnar cross-sections of compounds **PH<sub>n</sub>** (top) and 2-aryl-1,3,4-trifluorotriphenylenes (bottom).

## 10. DFT

**Table S9.** Molecular structures of compounds **BT1**, **PH1**, **NAA1**, **NAB1**, **PY1**, **TP1** and **TPE1**.

| Compound<br>s | Molecular structure |
|---------------|---------------------|
|               |                     |

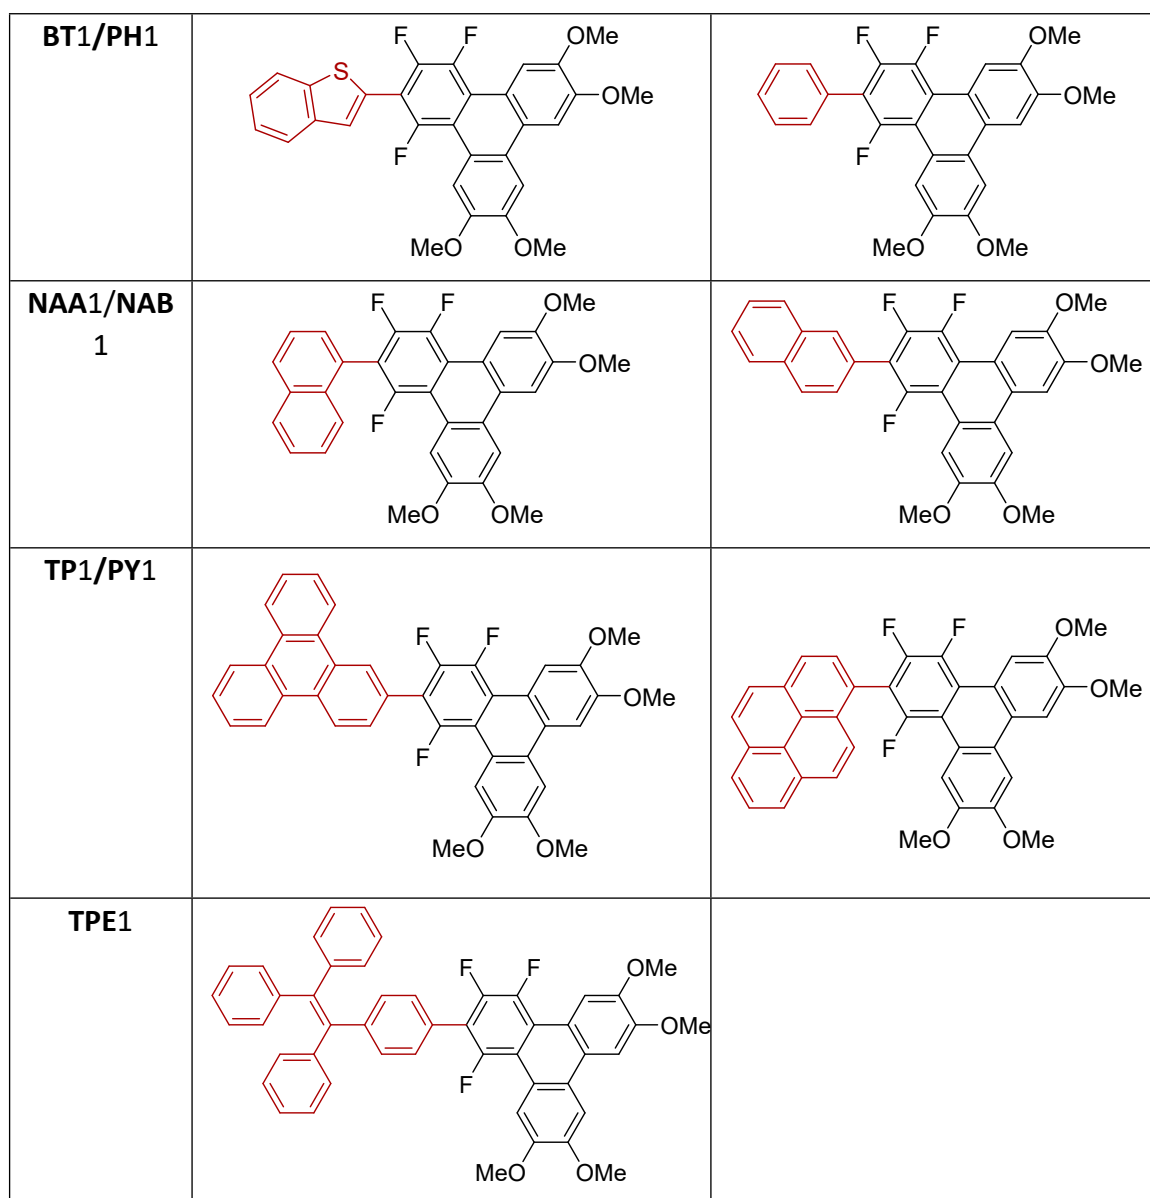

**Table S10.** DFT calculated optimized molecular structures in THF of **BT1**, **PH1**, **NAA1**, **NAB1**, **PY1**, **TP1** and **TPE1**.

| Compounds  | front views (in THF)                                                                | side views (in THF)                                                                   |
|------------|-------------------------------------------------------------------------------------|---------------------------------------------------------------------------------------|
| <b>BT1</b> |  |  |
| <b>PH1</b> |  |  |

|      |                                                                                     |                                                                                       |
|------|-------------------------------------------------------------------------------------|---------------------------------------------------------------------------------------|
| NAA1 | 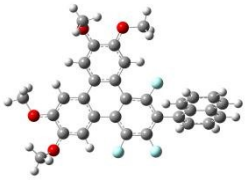   |    |
| NAB1 |    |    |
| PY1  |    |    |
| TP1  |   |   |
| TPE1 |  |  |

**Table S11.** DFT calculated optimized molecular structures in gas of **BT1**, **PH1**, **NAA1**, **NAB1**, **PY1**, **TP1** and **TPE1**.

| Compounds  | front views (in GAS)                                                                | side views (in GAS)                                                                   |
|------------|-------------------------------------------------------------------------------------|---------------------------------------------------------------------------------------|
| <b>BT1</b> | 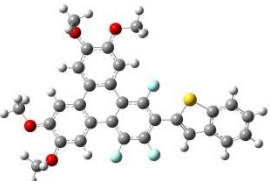 |  |

|      |                                                                                     |                                                                                       |
|------|-------------------------------------------------------------------------------------|---------------------------------------------------------------------------------------|
| PH1  | 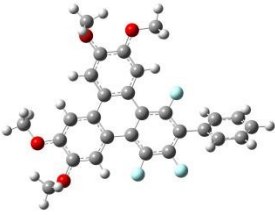   |    |
| NAA1 |    |    |
| NAB1 |    |    |
| PY1  |  |  |
| TP1  |  |  |
| TPE1 |  |  |

**Table S12.** List of selected molecular orbital energies for **BT1**, **PH1**, **NAA1**, **NAB1**, **PY1**, **TP1** and **TPE1** and the HOMO-LUMO energy gaps ( $\Delta E$ ).

|  | THF |  | GAS |
|--|-----|--|-----|
|  |     |  |     |

|      | HOMO<br>(eV) | LUMO<br>(eV) | $\Delta E$<br>(eV) |  | HOMO<br>(eV) | LUMO<br>(eV) | $\Delta E$<br>(eV) |
|------|--------------|--------------|--------------------|--|--------------|--------------|--------------------|
| BT1  | -5.88        | -2.05        | 3.83               |  | -5.77        | -1.97        | 3.80               |
| PH1  | -5.89        | -1.78        | 4.11               |  | -5.76        | -1.66        | 4.10               |
| NAA1 | -5.89        | -1.82        | 4.07               |  | -5.76        | -1.72        | 4.04               |
| NAB1 | -5.88        | -1.90        | 3.98               |  | -5.75        | -1.79        | 3.96               |
| PY1  | -5.78        | -2.14        | 3.63               |  | -5.68        | -2.06        | 3.62               |
| TP1  | -5.88        | -1.94        | 3.94               |  | -5.75        | -1.82        | 3.93               |
| TPE1 | -5.75        | -1.95        | 3.80               |  | -5.63        | -1.85        | 3.78               |

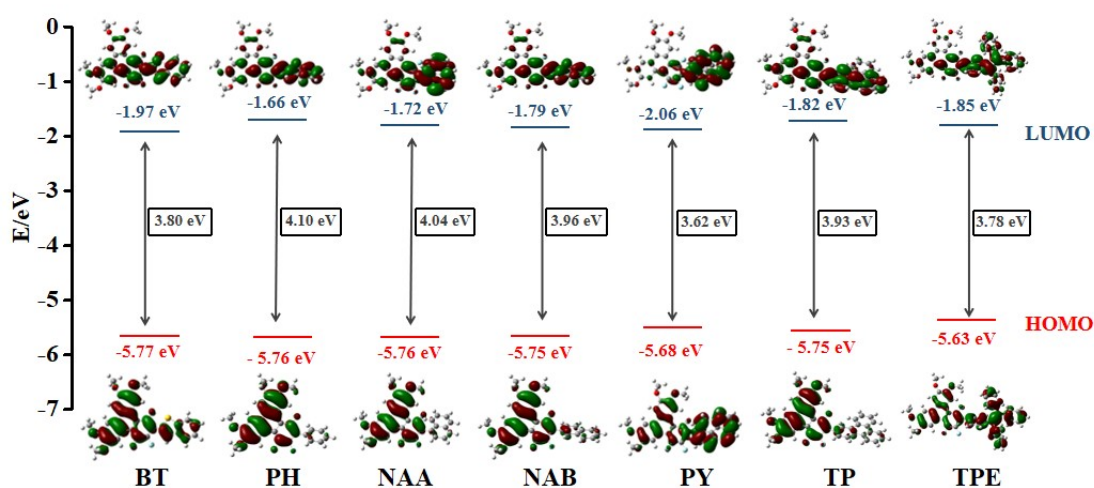

**Figure S78** HOMO-LUMO and energy gap of the 2-aryl-1,3,4-trifluorotriphenylenes in gas state.

## 11. TOF

**Table S13.** TOF photoconductivity (hole) of **PY8** recorded on heating (cell thickness 19.6  $\mu\text{m}$ ).

| $T$<br>( $^{\circ}\text{C}$ ) | $E$<br>( $\text{V cm}^{-1}$ ) | $\tau_{\text{hole}}$<br>(s) | $\mu_{\text{hole}}$<br>( $\text{cm}^2 \text{V}^{-1} \text{s}^{-1}$ ) | $\mu_{\text{average hole}}$<br>( $\text{cm}^2 \text{V}^{-1} \text{s}^{-1}$ ) |
|-------------------------------|-------------------------------|-----------------------------|----------------------------------------------------------------------|------------------------------------------------------------------------------|
| 30                            | $2 \times 10^4$               | $4.18 \times 10^{-3}$       | $2.35 \times 10^{-4}$                                                | $4.47 \times 10^{-4}$                                                        |
|                               | $3 \times 10^4$               | $4.40 \times 10^{-3}$       | $1.48 \times 10^{-4}$                                                |                                                                              |
|                               | $4 \times 10^4$               | $4.60 \times 10^{-3}$       | $1.06 \times 10^{-4}$                                                |                                                                              |
|                               | $5 \times 10^4$               | $4.69 \times 10^{-3}$       | $8.36 \times 10^{-5}$                                                |                                                                              |
| 40                            | $2 \times 10^4$               | $5.05 \times 10^{-4}$       | $1.94 \times 10^{-4}$                                                | $5.22 \times 10^{-4}$                                                        |

|     |                   |                       |                       |                       |
|-----|-------------------|-----------------------|-----------------------|-----------------------|
|     | 3×10 <sup>4</sup> | 5.11×10 <sup>-4</sup> | 1.28×10 <sup>-4</sup> |                       |
|     | 4×10 <sup>4</sup> | 5.34×10 <sup>-4</sup> | 9.18×10 <sup>-5</sup> |                       |
|     | 5×10 <sup>4</sup> | 5.39×10 <sup>-4</sup> | 7.28×10 <sup>-5</sup> |                       |
| 50  | 2×10 <sup>4</sup> | 5.76×10 <sup>-4</sup> | 1.70×10 <sup>-4</sup> | 5.74×10 <sup>-4</sup> |
|     | 3×10 <sup>4</sup> | 5.71×10 <sup>-4</sup> | 1.14×10 <sup>-4</sup> |                       |
|     | 4×10 <sup>4</sup> | 5.74×10 <sup>-4</sup> | 8.54×10 <sup>-5</sup> |                       |
|     | 5×10 <sup>4</sup> | 5.74×10 <sup>-4</sup> | 6.83×10 <sup>-5</sup> |                       |
| 60  | 2×10 <sup>4</sup> | 7.27×10 <sup>-4</sup> | 1.35×10 <sup>-4</sup> | 7.27×10 <sup>-4</sup> |
|     | 3×10 <sup>4</sup> | 7.10×10 <sup>-4</sup> | 9.20×10 <sup>-5</sup> |                       |
|     | 4×10 <sup>4</sup> | 7.25×10 <sup>-4</sup> | 6.76×10 <sup>-5</sup> |                       |
|     | 5×10 <sup>4</sup> | 7.45×10 <sup>-4</sup> | 5.26×10 <sup>-5</sup> |                       |
| 70  | 2×10 <sup>4</sup> | 7.94×10 <sup>-4</sup> | 1.23×10 <sup>-4</sup> | 8.06×10 <sup>-4</sup> |
|     | 3×10 <sup>4</sup> | 7.94×10 <sup>-4</sup> | 8.22×10 <sup>-5</sup> |                       |
|     | 4×10 <sup>4</sup> | 8.25×10 <sup>-4</sup> | 5.94×10 <sup>-5</sup> |                       |
|     | 5×10 <sup>4</sup> | 8.11×10 <sup>-4</sup> | 4.83×10 <sup>-5</sup> |                       |
| 80  | 2×10 <sup>4</sup> | 8.64×10 <sup>-4</sup> | 1.13×10 <sup>-4</sup> | 8.94×10 <sup>-4</sup> |
|     | 3×10 <sup>4</sup> | 8.84×10 <sup>-4</sup> | 7.39×10 <sup>-5</sup> |                       |
|     | 4×10 <sup>4</sup> | 8.99×10 <sup>-4</sup> | 5.45×10 <sup>-5</sup> |                       |
|     | 5×10 <sup>4</sup> | 9.31×10 <sup>-4</sup> | 4.21×10 <sup>-5</sup> |                       |
| 90  | 2×10 <sup>4</sup> | 1.04×10 <sup>-3</sup> | 9.45×10 <sup>-5</sup> | 1.01×10 <sup>-3</sup> |
|     | 3×10 <sup>4</sup> | 9.96×10 <sup>-4</sup> | 6.56×10 <sup>-5</sup> |                       |
|     | 4×10 <sup>4</sup> | 1.02×10 <sup>-3</sup> | 4.86×10 <sup>-5</sup> |                       |
|     | 5×10 <sup>4</sup> | 1.00×10 <sup>-3</sup> | 3.91×10 <sup>-5</sup> |                       |
| 100 | 2×10 <sup>4</sup> | 9.63×10 <sup>-4</sup> | 1.02×10 <sup>-4</sup> | 1.06×10 <sup>-3</sup> |
|     | 3×10 <sup>4</sup> | 1.04×10 <sup>-3</sup> | 6.31×10 <sup>-5</sup> |                       |
|     | 4×10 <sup>4</sup> | 1.11×10 <sup>-3</sup> | 4.43×10 <sup>-5</sup> |                       |
|     | 5×10 <sup>4</sup> | 1.13×10 <sup>-3</sup> | 3.46×10 <sup>-5</sup> |                       |
| 110 | 2×10 <sup>4</sup> | 9.63×10 <sup>-4</sup> | 1.02×10 <sup>-4</sup> | 1.06×10 <sup>-3</sup> |
|     | 3×10 <sup>4</sup> | 1.04×10 <sup>-3</sup> | 6.31×10 <sup>-5</sup> |                       |
|     | 4×10 <sup>4</sup> | 1.11×10 <sup>-3</sup> | 4.43×10 <sup>-5</sup> |                       |
|     | 5×10 <sup>4</sup> | 1.13×10 <sup>-3</sup> | 3.46×10 <sup>-5</sup> |                       |
| 120 | 2×10 <sup>4</sup> | 3.63×10 <sup>-5</sup> | 2.70×10 <sup>-3</sup> | 3.76×10 <sup>-5</sup> |
|     | 3×10 <sup>4</sup> | 3.76×10 <sup>-5</sup> | 1.74×10 <sup>-3</sup> |                       |
|     | 4×10 <sup>4</sup> | 3.87×10 <sup>-5</sup> | 1.27×10 <sup>-3</sup> |                       |
|     | 5×10 <sup>4</sup> | 3.78×10 <sup>-5</sup> | 1.04×10 <sup>-3</sup> |                       |

**Table S14.** TOF photoconductivity (hole) of **PY8** recorded on cooling (cell thickness 19.6 μm).

| <i>T</i><br>(°C) | <i>E</i><br>(V cm <sup>-1</sup> ) | $\tau_{\text{hole}}$<br>(s) | $\mu_{\text{hole}}$<br>(cm <sup>2</sup> V <sup>-1</sup> s <sup>-1</sup> ) | $\mu_{\text{average hole}}$<br>(cm <sup>2</sup> V <sup>-1</sup> s <sup>-1</sup> ) |
|------------------|-----------------------------------|-----------------------------|---------------------------------------------------------------------------|-----------------------------------------------------------------------------------|
| 120              | 2×10 <sup>4</sup>                 | 3.63×10 <sup>-5</sup>       | 2.70×10 <sup>-3</sup>                                                     | 3.76×10 <sup>-5</sup>                                                             |
|                  | 3×10 <sup>4</sup>                 | 3.76×10 <sup>-5</sup>       | 1.74×10 <sup>-3</sup>                                                     |                                                                                   |
|                  | 4×10 <sup>4</sup>                 | 3.87×10 <sup>-5</sup>       | 1.27×10 <sup>-3</sup>                                                     |                                                                                   |
|                  | 5×10 <sup>4</sup>                 | 3.78×10 <sup>-5</sup>       | 1.04×10 <sup>-3</sup>                                                     |                                                                                   |

|     |                   |                       |                       |                       |
|-----|-------------------|-----------------------|-----------------------|-----------------------|
| 110 | 2×10 <sup>4</sup> | 9.58×10 <sup>-4</sup> | 1.02×10 <sup>-4</sup> | 9.92×10 <sup>-5</sup> |
|     | 3×10 <sup>4</sup> | 9.92×10 <sup>-4</sup> | 6.58×10 <sup>-5</sup> |                       |
|     | 4×10 <sup>4</sup> | 1.01×10 <sup>-3</sup> | 4.88×10 <sup>-5</sup> |                       |
|     | 5×10 <sup>4</sup> | 1.01×10 <sup>-3</sup> | 3.87×10 <sup>-5</sup> |                       |
| 100 | 2×10 <sup>4</sup> | 8.27×10 <sup>-4</sup> | 1.18×10 <sup>-4</sup> | 9.66×10 <sup>-4</sup> |
|     | 3×10 <sup>4</sup> | 9.95×10 <sup>-4</sup> | 6.57×10 <sup>-5</sup> |                       |
|     | 4×10 <sup>4</sup> | 1.19×10 <sup>-3</sup> | 4.79×10 <sup>-5</sup> |                       |
|     | 5×10 <sup>4</sup> | 1.02×10 <sup>-3</sup> | 3.85×10 <sup>-5</sup> |                       |
| 90  | 2×10 <sup>4</sup> | 9.41×10 <sup>-4</sup> | 1.04×10 <sup>-4</sup> | 9.40×10 <sup>-4</sup> |
|     | 3×10 <sup>4</sup> | 9.13×10 <sup>-4</sup> | 7.15×10 <sup>-5</sup> |                       |
|     | 4×10 <sup>4</sup> | 9.52×10 <sup>-4</sup> | 5.15×10 <sup>-5</sup> |                       |
|     | 5×10 <sup>4</sup> | 9.55×10 <sup>-4</sup> | 4.11×10 <sup>-5</sup> |                       |
| 80  | 2×10 <sup>4</sup> | 8.48×10 <sup>-4</sup> | 1.16×10 <sup>-4</sup> | 8.47×10 <sup>-4</sup> |
|     | 3×10 <sup>4</sup> | 8.42×10 <sup>-4</sup> | 7.76×10 <sup>-5</sup> |                       |
|     | 4×10 <sup>4</sup> | 8.49×10 <sup>-4</sup> | 5.77×10 <sup>-5</sup> |                       |
|     | 5×10 <sup>4</sup> | 8.49×10 <sup>-4</sup> | 4.62×10 <sup>-5</sup> |                       |
| 70  | 2×10 <sup>4</sup> | 7.25×10 <sup>-4</sup> | 1.35×10 <sup>-4</sup> | 3.39×10 <sup>-4</sup> |
|     | 3×10 <sup>4</sup> | 7.22×10 <sup>-4</sup> | 9.04×10 <sup>-5</sup> |                       |
|     | 4×10 <sup>4</sup> | 7.46×10 <sup>-4</sup> | 6.57×10 <sup>-5</sup> |                       |
|     | 5×10 <sup>4</sup> | 7.62×10 <sup>-4</sup> | 5.14×10 <sup>-5</sup> |                       |
| 60  | 2×10 <sup>4</sup> | 6.20×10 <sup>-4</sup> | 1.58×10 <sup>-4</sup> | 6.45×10 <sup>-4</sup> |
|     | 3×10 <sup>4</sup> | 6.61×10 <sup>-4</sup> | 9.88×10 <sup>-5</sup> |                       |
|     | 4×10 <sup>4</sup> | 6.43×10 <sup>-4</sup> | 7.62×10 <sup>-5</sup> |                       |
|     | 5×10 <sup>4</sup> | 6.55×10 <sup>-4</sup> | 5.99×10 <sup>-5</sup> |                       |
| 50  | 2×10 <sup>4</sup> | 5.30×10 <sup>-4</sup> | 1.85×10 <sup>-4</sup> | 5.71×10 <sup>-4</sup> |
|     | 3×10 <sup>4</sup> | 5.71×10 <sup>-4</sup> | 1.14×10 <sup>-4</sup> |                       |
|     | 4×10 <sup>4</sup> | 5.81×10 <sup>-4</sup> | 8.43×10 <sup>-5</sup> |                       |
|     | 5×10 <sup>4</sup> | 6.00×10 <sup>-4</sup> | 6.53×10 <sup>-5</sup> |                       |
| 40  | 2×10 <sup>4</sup> | 4.79×10 <sup>-4</sup> | 2.05×10 <sup>-4</sup> | 4.90×10 <sup>-4</sup> |
|     | 3×10 <sup>4</sup> | 4.90×10 <sup>-4</sup> | 1.33×10 <sup>-4</sup> |                       |
|     | 4×10 <sup>4</sup> | 4.99×10 <sup>-4</sup> | 9.81×10 <sup>-5</sup> |                       |
|     | 5×10 <sup>4</sup> | 4.93×10 <sup>-4</sup> | 7.96×10 <sup>-5</sup> |                       |
| 30  | 2×10 <sup>4</sup> | 4.00×10 <sup>-4</sup> | 2.45×10 <sup>-4</sup> | 4.00×10 <sup>-4</sup> |
|     | 3×10 <sup>4</sup> | 3.84×10 <sup>-4</sup> | 1.70×10 <sup>-4</sup> |                       |
|     | 4×10 <sup>4</sup> | 3.91×10 <sup>-4</sup> | 1.25×10 <sup>-4</sup> |                       |
|     | 5×10 <sup>4</sup> | 4.26×10 <sup>-4</sup> | 9.21×10 <sup>-5</sup> |                       |

T: test temperature; E: external electric field strength;  $\tau_{\text{hole}}$ : hole drift time;  $\mu_{\text{hole}}$ : charge drift times available at various electric fields;  $\mu$ : average hole transport rate



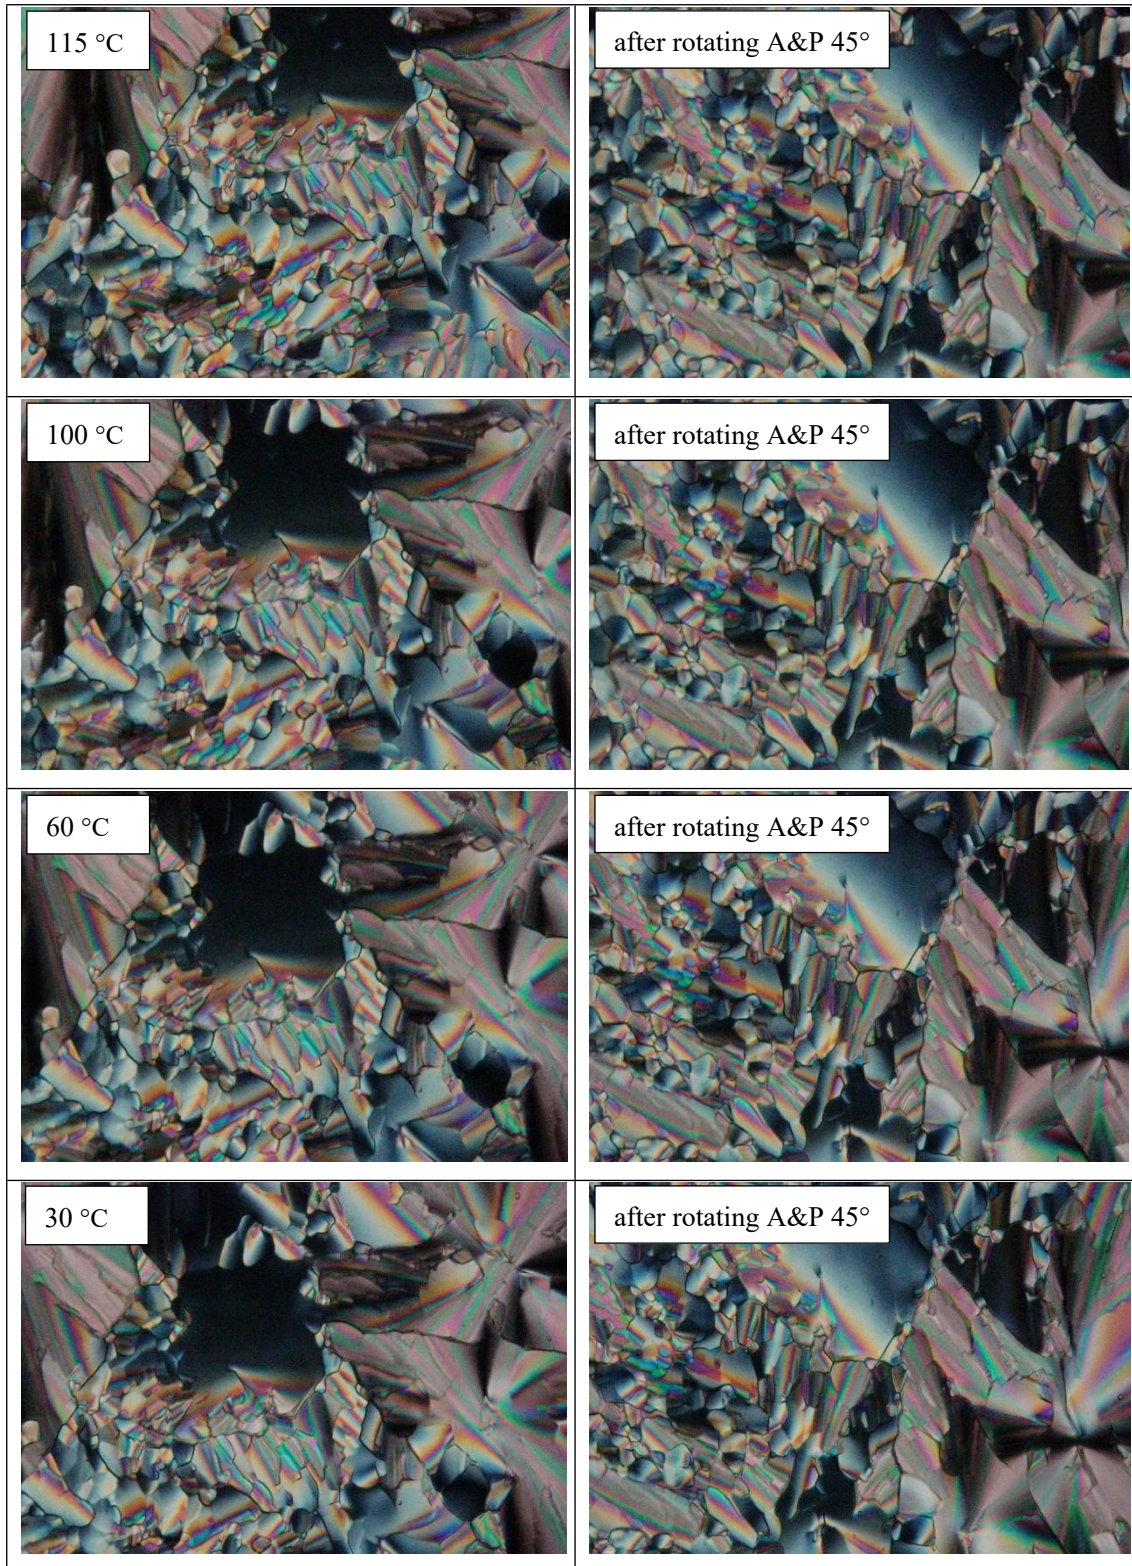

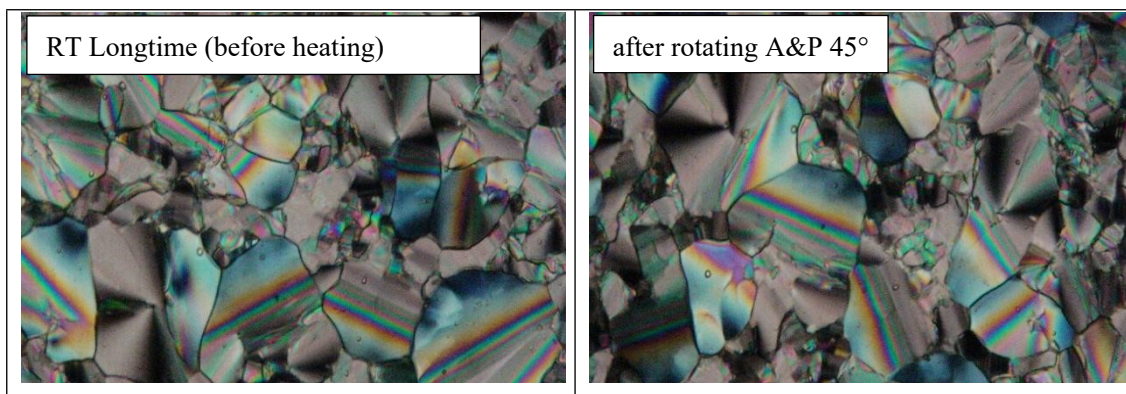

**Figure S79** POM images of sample **PY8** in ITO LC cell taken both on heating and cooling run during the TOF measurement.
